# Supplementary material for: A diastereoselective approach to axially chiral biaryls via electrochemically enabled cyclization cascade
Source: PubMed Central journal article supplement (PMC6444422; doi:10.3762/bjoc.15.76), 2019-03-28

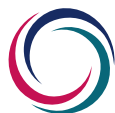

## Supporting Information

for

### **A diastereoselective approach to axially chiral biaryls via electrochemically enabled cyclization cascade**

Hong Yan, Zhong-Yi Mao, Zhong-Wei Hou, Jinshuai Song and Hai-Chao Xu

*Beilstein J. Org. Chem.* **2019**, *15*, 795–800. [doi:10.3762/bjoc.15.76](https://doi.org/10.3762/bjoc.15.76)

## Experimental part

| <b>Contents</b>                                               | <b>Page</b> |
|---------------------------------------------------------------|-------------|
| <b>1. General Information</b>                                 | <b>S2</b>   |
| <b>2. General Procedure for the Electrolysis</b>              | <b>S2</b>   |
| <b>3. Unsuccessful Substrates</b>                             | <b>S2</b>   |
| <b>4. Characterization Data for the Electrolysis Products</b> | <b>S2</b>   |
| <b>6. General Procedure for the Synthesis of Substrates</b>   | <b>S10</b>  |
| <b>6. X-ray Crystallography of 3k</b>                         | <b>S18</b>  |
| <b>7. References</b>                                          | <b>S19</b>  |
| <b>8. NMR Spectra for New Compounds</b>                       | <b>S20</b>  |

## 1. General Information

Acetonitrile were obtained by distillation under argon from calcium hydride. Flash column chromatography was performed with silica gel (230–400 mesh). NMR spectra were recorded on Bruker AV-400, Bruker AV-500 and Bruker Ascend 600 A instruments. Data were reported as chemical shifts in ppm relative to  $\text{CDCl}_3$  (7.27 ppm) for  $^1\text{H}$  and  $\text{CDCl}_3$  (77.2 ppm), respectively. The abbreviations used for explaining the multiplicities were as follows: s = singlet, d = doublet, t = triplet, q = quartet, m = multiplet, br = broad. High resolution mass spectra (ESI HRMS) were recorded on a Micromass QTOF2 Quadruple/Time-of-Flight Tandem mass spectrometer by the instrumentation center of Department of Chemistry, Xiamen University. Cyclic voltammograms were obtained on a CHI 760E potentiostat. Infrared spectra (IR) were recorded on a Nicolet AVATER FTIR330 spectrometer.

## 2. General Procedure for the Electrolysis

All the electrolysis reactions were performed according to a previously reported procedure [1]. A 25 mL three-necked round-bottomed flask was charged with **1** (0.03 mmol), the substrate (0.3 mmol),  $\text{Et}_4\text{NBF}_4$  (0.3 mmol), and  $\text{NaHCO}_3$  (0.6 mmol). The flask was equipped with a condenser, a reticulated vitreous carbon (100 PPI,  $\sim 65 \text{ cm}^2 \text{ cm}^{-3}$ , 1 cm x 1 cm x 1.2 cm) anode and a platinum plate (1 cm x 1 cm) cathode and then flushed with argon. MeCN (9 mL) and  $\text{H}_2\text{O}$  (1 mL) were added. The electrolysis was carried out at 80 °C (oil bath temperature) using a constant current of 7.5 mA for 3.75 h. The reaction mixture was cooled to RT and concentrated under reduced pressure. The residue was chromatographed through silica gel eluting with ethyl acetate/hexanes to give the desired product.

## 3. Unsuccessful Substrates

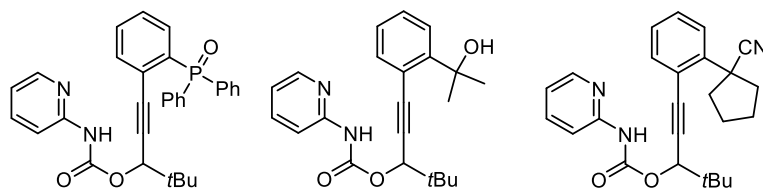

## 4. Characterization Data for the Electrolysis Products

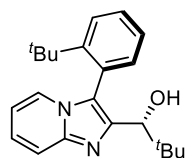

**(±)-1-(3-(2-(tert-Butyl)phenyl)imidazo[1,2-a]pyridin-2-yl)-2,2-dimethylpropan-1-ol (3a).** Yield = 68%; White solid;  $^1\text{H}$  NMR (500 MHz,  $\text{CDCl}_3$ )  $\delta$  7.69 (dd,  $J = 8.2, 1.3$  Hz, 1H), 7.66–7.60 (m, 1H), 7.51–7.44 (m, 1H), 7.41–7.36 (m, 1H), 7.31–7.26 (m, 1H), 7.21–7.12 (m, 1H), 7.06 (dd,  $J = 7.5, 1.6$  Hz, 1H), 6.74–6.67 (m, 1H), 4.18 (d,  $J = 8.4$  Hz, 1H), 2.86 (d,  $J = 8.9$  Hz, 1H), 1.10 (s, 9H), 0.97 (s, 9H);  $^{13}\text{C}$  NMR (126 MHz,  $\text{CDCl}_3$ )  $\delta$  152.4, 144.7, 143.8, 135.5, 130.0, 128.4, 126.2, 126.1, 124.3, 124.2, 123.4, 117.3, 112.1, 75.4, 37.1, 36.6, 31.6,

26.6. IR (neat,  $\text{cm}^{-1}$ ): 3294, 2957, 1633, 1504, 1477, 1373, 1261, 1067, 1016, 792, 756, 753. ESI HRMS  $m/z$  ( $\text{M}+\text{H}$ )<sup>+</sup> calcd 337.2274, obsd 337.2281.

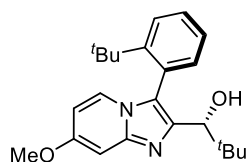

**(±)-1-(3-(2-(*tert*-Butyl)phenyl)-7-methoxyimidazo[1,2-*a*]pyridin-2-yl)-2,2-dimethylpropan-1-ol (3e).** Yield = 76%; White solid; <sup>1</sup>H NMR (500 MHz,  $\text{CDCl}_3$ )  $\delta$  7.66 (dd,  $J = 8.2, 1.3$  Hz, 1H), 7.48–7.41 (m, 1H), 7.30–7.23 (m, 1H), 7.19 (d,  $J = 7.4$  Hz, 1H), 7.06 (dd,  $J = 7.6, 1.6$  Hz, 1H), 6.91 (d,  $J = 2.4$  Hz, 1H), 6.42 (dd,  $J = 7.5, 2.4$  Hz, 1H), 4.11 (d,  $J = 8.5$  Hz, 1H), 3.86 (s, 3H), 2.81 (d,  $J = 8.9$  Hz, 1H), 1.12 (s, 9H), 0.97 (s, 9H); <sup>13</sup>C NMR (126 MHz,  $\text{CDCl}_3$ )  $\delta$  157.7, 152.5, 145.1, 143.8, 135.8, 129.9, 128.3, 126.3, 126.0, 124.8, 122.1, 107.1, 94.5, 75.4, 55.6, 37.0, 36.6, 31.6, 26.7. IR (neat,  $\text{cm}^{-1}$ ): 3354, 2953, 1648, 1476, 1364, 1220, 1172, 1085, 1026; ESI HRMS  $m/z$  ( $\text{M}+\text{Na}$ )<sup>+</sup> calcd 391.2356, obsd 391.2352.

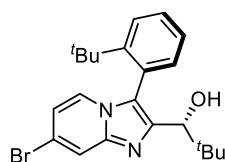

**(±)-1-(7-Bromo-3-(2-(*tert*-butyl)phenyl)imidazo[1,2-*a*]pyridin-2-yl)-2,2-dimethylpropan-1-ol (3f).** Yield = 66%; White solid; <sup>1</sup>H NMR (400 MHz,  $\text{CDCl}_3$ )  $\delta$  7.69 (dd,  $J = 8.2, 1.3$  Hz, 1H), 7.66 (dd,  $J = 2.1, 0.8$  Hz, 1H), 7.51–7.45 (m, 1H), 7.33–7.27 (m, 2H), 7.04 (dd,  $J = 7.6, 1.7$  Hz, 1H), 6.69 (dd,  $J = 7.3, 2.0$  Hz, 1H), 4.16 (d,  $J = 6.3$  Hz, 1H), 3.03 (s, 1H), 1.10 (s, 9H), 0.96 (s, 9H). <sup>13</sup>C NMR (101 MHz,  $\text{CDCl}_3$ )  $\delta$  152.4, 145.7, 143.5, 135.3, 130.6, 130.2, 128.5, 126.2, 125.6, 124.5, 123.6, 116.3, 113.8, 75.3, 37.0, 36.6, 31.6, 26.6. IR (neat,  $\text{cm}^{-1}$ ): 3350, 2958, 2905, 1629, 1508, 1480, 1392, 1370, 1340, 1062, 1001, 920, 877, 782, 755. ESI HRMS  $m/z$  ( $\text{M}+\text{Na}$ )<sup>+</sup> calcd 437.1199, obsd 437.1203.

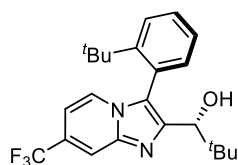

**(±)-1-(3-(2-(*tert*-Butyl)phenyl)-7-(trifluoromethyl)imidazo[1,2-*a*]pyridin-2-yl)-2,2-dimethylpropan-1-ol (3g).** Yield = 80%; White solid; <sup>1</sup>H NMR (500 MHz,  $\text{CDCl}_3$ )  $\delta$  8.01 (s, 1H), 7.71 (d,  $J = 8.2$  Hz, 1H), 7.54–7.48 (m, 2H), 7.34–7.27 (m, 1H), 7.04 (d,  $J = 7.5$  Hz, 1H), 6.88 (d,  $J = 7.2$  Hz, 1H), 4.21 (d,  $J = 7.5$  Hz, 1H), 3.17 (s, 1H), 1.10 (s, 9H), 0.96 (s, 9H); <sup>13</sup>C NMR (214 MHz,  $\text{CDCl}_3$ )  $\delta$  152.3, 147.3, 141.9, 135.0, 130.4, 128.6, 126.3, 125.9 (q,  $J = 33.7$  Hz), 125.2, 125.0, 124.9, 123.7 (q,  $J = 271.9$  Hz), 115.6 (q,  $J = 4.9$  Hz), 108.1 (q,  $J = 3.0$  Hz), 75.3, 37.1, 36.6, 31.6, 26.5; <sup>19</sup>F NMR (471 MHz,  $\text{CDCl}_3$ )  $\delta$  -63.3. IR (neat,  $\text{cm}^{-1}$ ): 3386, 2955, 1506, 1480, 1349, 1340, 1236, 1171, 1130, 1052, 1002, 921, 763; ESI HRMS  $m/z$  ( $\text{M}+\text{Na}$ )<sup>+</sup> calcd 427.1968, obsd 429.1967.

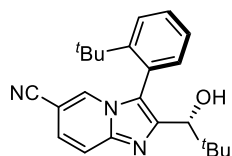

**(±)-3-(2-(*tert*-Butyl)phenyl)-2-(1-hydroxy-2,2-dimethylpropyl)imidazo[1,2-*a*]pyridine-6-carbonitrile (3h).** Yield = 62%; White solid;  $^1\text{H}$  NMR (400 MHz,  $\text{CDCl}_3$ )  $\delta$  7.80 (dd,  $J = 1.8, 1.0$  Hz, 1H), 7.77–7.68 (m, 2H), 7.56–7.51 (m, 1H), 7.37–7.29 (m, 1H), 7.27 (dd,  $J = 9.4, 1.7$  Hz, 1H), 7.03 (dd,  $J = 7.6, 1.6$  Hz, 1H), 4.21 (d,  $J = 8.9$  Hz, 1H), 2.90 (s, 1H), 1.09 (s, 9H), 0.96 (s, 9H).  $^{13}\text{C}$  NMR (101 MHz,  $\text{CDCl}_3$ )  $\delta$  152.4, 147.4, 143.0, 135.0, 130.8, 130.5, 128.8, 126.5, 124.8, 124.3, 123.9, 118.5, 116.8, 98.5, 75.2, 37.1, 36.6, 31.6, 26.5. IR (neat,  $\text{cm}^{-1}$ ): 3401, 2955, 2230, 1713, 1631, 1481, 1380, 1321, 1272, 1062, 1002, 763. ESI HRMS  $m/z$  ( $\text{M}+\text{Na}$ ) $^+$  calcd 384.2046, obsd 384.2047.

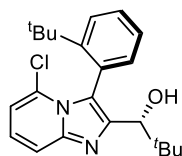

**(±)-1-(3-(2-(*tert*-Butyl)phenyl)-5-chloroimidazo[1,2-*a*]pyridin-2-yl)-2,2-dimethylpropan-1-ol (3i).** Yield = 82%; White solid;  $^1\text{H}$  NMR (600 MHz,  $\text{CDCl}_3$ )  $\delta$  7.60 (dd,  $J = 15.9, 8.6$  Hz, 2H), 7.45–7.39 (m, 1H), 7.17 (dd,  $J = 18.8, 7.4$  Hz, 2H), 7.09 (d,  $J = 8.0$  Hz, 1H), 6.74 (d,  $J = 7.1$  Hz, 1H), 4.04 (d,  $J = 8.3$  Hz, 1H), 2.76 (d,  $J = 9.2$  Hz, 1H), 1.10 (s, 9H), 0.97 (s, 9H);  $^{13}\text{C}$  NMR (151 MHz,  $\text{CDCl}_3$ )  $\delta$  151.5, 146.0, 145.6, 136.3, 129.4, 127.8, 127.2, 126.7, 124.8, 123.8, 123.7, 116.3, 113.9, 74.4, 36.8, 36.8, 31.8, 26.5. IR (neat,  $\text{cm}^{-1}$ ): 3351, 2955, 1624, 1488, 1393, 1363, 1275, 1152, 1064, 1015, 775, 761; ESI HRMS  $m/z$  ( $\text{M}+\text{Na}$ ) $^+$  calcd 393.1704, obsd 393.1709.

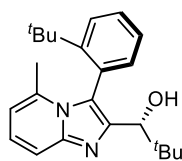

**(±)-1-(3-(2-(*tert*-Butyl)phenyl)-5-methylimidazo[1,2-*a*]pyridin-2-yl)-2,2-dimethylpropan-1-ol (3j).** Yield = 78%; White solid;  $^1\text{H}$  NMR (500 MHz,  $\text{CDCl}_3$ )  $\delta$  7.59 (d,  $J = 8.1$  Hz, 1H), 7.52 (d,  $J = 9.0$  Hz, 1H), 7.47–7.40 (m, 1H), 7.29–7.23 (m, 1H), 7.19–7.12 (m, 1H), 7.05 (dd,  $J = 9.0, 6.8$  Hz, 1H), 6.43 (d,  $J = 6.7$  Hz, 1H), 4.01 (d,  $J = 9.1$  Hz, 1H), 2.70 (d,  $J = 9.0$  Hz, 1H), 2.00 (s, 3H), 1.07 (s, 9H), 0.97 (s, 9H);  $^{13}\text{C}$  NMR (126 MHz,  $\text{CDCl}_3$ )  $\delta$  152.1, 145.4, 145.4, 136.6, 136.4, 129.7, 128.5, 128.3, 124.2, 124.1, 123.9, 116.0, 113.5, 74.8, 37.1, 37.0, 32.1, 26.7, 21.2; IR (neat,  $\text{cm}^{-1}$ ): 3195, 2964, 1736, 1582, 1532, 1460, 1395, 1262, 1211, 1076, 985, 757; ESI HRMS  $m/z$  ( $\text{M}+\text{Na}$ ) $^+$  calcd 375.2407, obsd 375.2371.

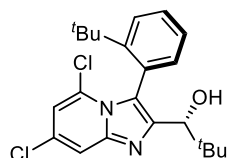

**(±)-1-(3-(2-(*tert*-Butyl)phenyl)-5,7-dichloroimidazo[1,2-*a*]pyridin-2-yl)-2,2-dimethylpropan-1-ol (3k).** Yield = 48%; White solid;  $^1\text{H}$  NMR (400 MHz,  $\text{CDCl}_3$ )  $\delta$  7.62 (d,  $J = 2.0$  Hz, 1H), 7.61–7.57 (m, 1H), 7.47–7.40 (m, 1H), 7.19–7.13 (m, 2H), 6.77 (d,  $J = 2.0$  Hz, 1H), 4.02 (d,  $J = 9.3$  Hz, 1H), 2.61 (d,  $J = 9.3$  Hz, 1H), 1.10 (s, 9H), 0.96 (s, 9H);  $^{13}\text{C}$  NMR (101 MHz,  $\text{CDCl}_3$ )  $\delta$  151.8, 147.1, 145.2, 136.5, 130.1, 129.9, 128.2, 127.5, 126.8, 125.4, 124.1, 115.5, 115.1, 74.6, 37.0, 37.0, 32.1, 26.6; IR (neat,  $\text{cm}^{-1}$ ): 3362, 2955, 1618, 1491, 1365, 1274, 1148, 1061, 1011, 828, 762; ESI HRMS  $m/z$  ( $\text{M}+\text{Na}$ ) $^+$  calcd 427.1314, obsd 427.1318.

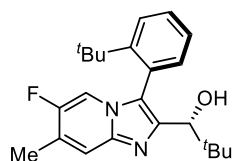

**(±)-1-(3-(2-(*tert*-Butyl)phenyl)-6-fluoro-7-methylimidazo[1,2-*a*]pyridin-2-yl)-2,2-dimethylpropan-1-ol (3l).** Yield = 65%; White solid;  $^1\text{H}$  NMR (400 MHz,  $\text{CDCl}_3$ )  $\delta$  7.69 (dd,  $J = 8.2, 1.1$  Hz, 1H), 7.52–7.44 (m, 1H), 7.42 (d,  $J = 7.1$  Hz, 1H), 7.29–7.24 (m, 1H), 7.24 (d,  $J = 4.7$  Hz, 1H), 7.03 (dd,  $J = 7.6, 1.6$  Hz, 1H), 4.15 (d,  $J = 8.9$  Hz, 1H), 2.89 (s, 1H), 2.36 (s, 3H), 1.11 (s, 9H), 0.95 (s, 9H).  $^{13}\text{C}$  NMR (126 MHz,  $\text{CDCl}_3$ )  $\delta$  153.0 (d,  $J = 243.2$  Hz), 152.2, 145.3 (d,  $J = 2.1$  Hz), 141.6, 135.2, 129.9, 128.3, 126.4 (d,  $J = 21.2$  Hz), 126.0, 125.8, 123.7 (d,  $J = 1.9$  Hz), 116.7 (d,  $J = 5.6$  Hz), 109.9 (d,  $J = 42.3$  Hz), 75.2, 36.9, 36.5, 31.4, 26.4, 15.2 (d,  $J = 3.1$  Hz).  $^{19}\text{F}$  NMR (471 MHz,  $\text{CDCl}_3$ )  $\delta$  -144.1; IR (neat,  $\text{cm}^{-1}$ ): 3359, 2921, 1632, 1513, 1382, 1123, 1063; ESI HRMS  $m/z$  ( $\text{M}+\text{Na}$ ) $^+$  calcd 391.2156, obsd 391.2158.

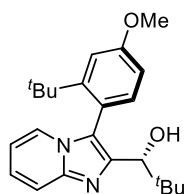

**(±)-1-(3-(2-(*tert*-Butyl)-4-methoxyphenyl)imidazo[1,2-*a*]pyridin-2-yl)-2,2-dimethylpropan-1-ol (3m).** Major isomer: Yield = 75%; White solid;  $^1\text{H}$  NMR (400 MHz,  $\text{CDCl}_3$ )  $\delta$  7.60 (d,  $J = 9.1$  Hz, 1H), 7.39 (d,  $J = 6.8$  Hz, 1H), 7.21 (d,  $J = 2.5$  Hz, 1H), 7.16–7.10 (m, 1H), 6.98 (d,  $J = 8.4$  Hz, 1H), 6.82 (dd,  $J = 8.4, 2.6$  Hz, 1H), 6.70–6.65 (m, 1H), 4.19 (d,  $J = 8.3$  Hz, 1H), 3.88 (s, 3H), 2.89 (s, 1H), 1.08 (s, 9H), 0.97 (s, 9H);  $^{13}\text{C}$  NMR (101 MHz,  $\text{CDCl}_3$ )  $\delta$  160.5, 154.1, 145.0, 143.8, 136.8, 124.3, 124.0, 123.1, 118.2, 117.3, 115.0, 112.0, 110.5, 75.4, 55.3, 37.0, 36.6, 31.4, 26.6; IR (neat,  $\text{cm}^{-1}$ ): 3317, 2953, 1605, 1561, 1505, 1480, 1372, 1268, 1230, 1060, 1015, 761; ESI HRMS  $m/z$  ( $\text{M}+\text{Na}$ ) $^+$  calcd 389.2199, obsd 389.2201.

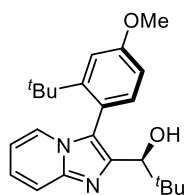

**(±)-1-(3-(2-(*tert*-Butyl)-4-methoxyphenyl)imidazo[1,2-*a*]pyridin-2-yl)-2,2-dimethylpropan-1-ol (3m')**. Minor isomer: Yield = 16%; White solid;  $^1\text{H}$  NMR (400 MHz,  $\text{CDCl}_3$ )  $\delta$  7.61–7.58 (m, 1H), 7.46–7.44 (m, 1H), 7.22 (d,  $J = 2.6$  Hz, 1H), 7.17–7.11 (m, 1H), 7.07 (d,  $J = 8.5$  Hz, 1H), 6.84 (dd,  $J = 8.5, 2.7$  Hz, 1H), 6.72–6.69 (m, 1H), 4.46 (s, 1H), 3.88 (s, 3H), 1.13 (s, 9H), 1.09 (s, 9H).  $^{13}\text{C}$  NMR (151 MHz,  $\text{CDCl}_3$ )  $\delta$  160.5, 153.2, 145.1, 143.5, 136.2, 124.6, 124.2, 124.0, 117.9, 117.5, 116.3, 112.0, 111.3, 76.3, 55.4, 37.2, 36.9, 31.8, 26.9. IR (neat,  $\text{cm}^{-1}$ ): 3431, 2955, 1604, 1480, 1342, 1289, 1230, 1048, 1012, 753; ESI HRMS  $m/z$  ( $\text{M}+\text{Na}$ ) $^+$  calcd 389.2199, obsd 389.2203.

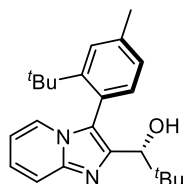

**(±)-1-(3-(2-(*tert*-Butyl)-4-methylphenyl)imidazo[1,2-*a*]pyridin-2-yl)-2,2-dimethylpropan-1-ol (3e)**. Major isomer. Yield = 71%; White solid;  $^1\text{H}$  NMR (400 MHz,  $\text{CDCl}_3$ )  $\delta$  7.61 (d,  $J = 9.0$  Hz, 1H), 7.47 (s, 1H), 7.38 (d,  $J = 6.9$  Hz, 1H), 7.17–7.05 (m, 2H), 6.94 (d,  $J = 7.7$  Hz, 1H), 6.70–6.65 (m, 1H), 4.19 (d,  $J = 8.5$  Hz, 1H), 2.90 (d,  $J = 8.8$  Hz, 1H), 2.44 (s, 3H), 1.08 (s, 9H), 0.97 (s, 9H).  $^{13}\text{C}$  NMR (101 MHz,  $\text{CDCl}_3$ )  $\delta$  152.0, 144.8, 143.8, 139.6, 135.4, 129.1, 126.9, 124.3, 123.9, 123.4, 123.1, 117.3, 111.9, 75.4, 37.0, 36.4, 31.6, 26.6, 21.8. IR (neat,  $\text{cm}^{-1}$ ): 3320, 2950, 1504, 1476, 1387, 1371, 1353, 1275, 1058, 1014, 760; ESI HRMS  $m/z$  ( $\text{M}+\text{Na}$ ) $^+$  calcd 373.2250, obsd 373.2247.

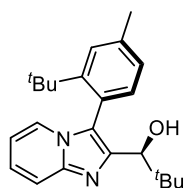

**(±)-1-(3-(2-(*tert*-Butyl)-4-methylphenyl)imidazo[1,2-*a*]pyridin-2-yl)-2,2-dimethylpropan-1-ol (3e')**. Minor isomer. Yield = 11%; White solid;  $^1\text{H}$  NMR (400 MHz,  $\text{CDCl}_3$ )  $\delta$  7.62–7.59 (m, 1H), 7.48 (d,  $J = 1.8$  Hz, 1H), 7.46–7.43 (m, 1H), 7.17–7.12 (m, 1H), 7.10 (dd,  $J = 7.7, 1.1$  Hz, 1H), 7.01 (d,  $J = 7.7$  Hz, 1H), 6.70–6.67 (m, 1H), 4.47 (s, 1H), 2.44 (s, 3H), 1.14 (s, 9H), 1.09 (s, 9H);  $^{13}\text{C}$  NMR (126 MHz,  $\text{CDCl}_3$ )  $\delta$  151.0, 144.8, 143.3, 139.3, 134.6, 130.5, 127.4, 124.7, 124.0, 123.7, 122.5, 117.3, 111.8, 76.2, 36.8, 36.8, 31.7, 26.7, 21.6; IR (neat,  $\text{cm}^{-1}$ ): 3412, 2954, 1607, 1504, 1478, 1362, 1342, 1267, 1014, 753; ESI HRMS  $m/z$  ( $\text{M}+\text{Na}$ ) $^+$

calcd 373.2250, obsd 373.2250.

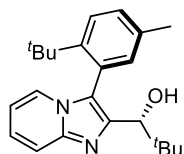

**(±)-1-(3-(2-(*tert*-Butyl)-5-methylphenyl)imidazo[1,2-*a*]pyridin-2-yl)-2,2-dimethylpropan-1-ol (3o).** Yield = 75%; White solid;  $^1\text{H}$  NMR (400 MHz,  $\text{CDCl}_3$ )  $\delta$  7.66–7.58 (m, 1H), 7.56 (d,  $J = 8.3$  Hz, 1H), 7.44–7.36 (m, 1H), 7.27 (dd,  $J = 8.3, 2.1$  Hz, 1H), 7.19–7.10 (m, 1H), 6.87 (d,  $J = 2.1$  Hz, 1H), 6.73–6.65 (m, 1H), 4.19 (d,  $J = 8.5$  Hz, 1H), 2.86 (s, 1H), 2.30 (s, 3H), 1.07 (s, 9H), 0.98 (s, 9H);  $^{13}\text{C}$  NMR (101 MHz,  $\text{CDCl}_3$ )  $\delta$  149.2, 144.7, 143.8, 136.0, 135.5, 130.6, 128.3, 126.0, 124.4, 124.0, 123.5, 117.3, 112.0, 75.4, 37.1, 36.3, 31.7, 26.6, 20.5; IR (neat,  $\text{cm}^{-1}$ ): 3294, 2951, 1506, 1496, 1384, 1345, 1289, 1275, 1054, 1015, 826, 744; ESI HRMS  $m/z$  ( $\text{M}+\text{Na}$ ) $^+$  calcd 373.2250, obsd 373.2248.

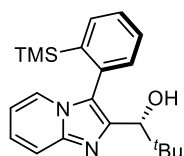

**(±)-2,2-Dimethyl-1-(3-(2-(trimethylsilyl)phenyl)imidazo[1,2-*a*]pyridin-2-yl)propan-1-ol (3p).** Yield = 83%; White solid;  $^1\text{H}$  NMR (500 MHz,  $\text{CDCl}_3$ )  $\delta$  7.80–7.72 (m, 1H), 7.63 (d,  $J = 9.0$  Hz, 1H), 7.54–7.46 (m, 2H), 7.44 (d,  $J = 6.8$  Hz, 1H), 7.29–7.23 (m, 1H), 7.21–7.13 (m, 1H), 6.73–6.65 (m, 1H), 4.16 (d,  $J = 8.7$  Hz, 1H), 3.01 (d,  $J = 8.7$  Hz, 1H), 0.94 (s, 9H), -0.14 (s, 9H);  $^{13}\text{C}$  NMR (126 MHz,  $\text{CDCl}_3$ )  $\delta$  144.8, 143.7, 143.7, 136.0, 133.8, 133.3, 129.3, 128.9, 124.3, 124.1, 123.2, 117.4, 112.1, 75.0, 37.0, 26.5, -0.6; IR (neat,  $\text{cm}^{-1}$ ): 3369, 2951, 1505, 1362, 1342, 1250, 1121, 1082, 1014, 839, 752; ESI HRMS  $m/z$  ( $\text{M}+\text{Na}$ ) $^+$  calcd 377.2020, obsd 377.2012.

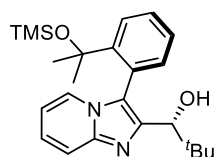

**(±)-2,2-Dimethyl-1-(3-(2-(2-((trimethylsilyl)oxy)propan-2-yl)phenyl)imidazo[1,2-*a*]pyridin-2-yl)propan-1-ol (3q).** Yield = 88%; White solid;  $^1\text{H}$  NMR (500 MHz,  $\text{CDCl}_3$ )  $\delta$  7.90 (d,  $J = 8.1$  Hz, 1H), 7.62 (d,  $J = 9.1$  Hz, 1H), 7.54–7.46 (m, 1H), 7.39 (d,  $J = 6.9$  Hz, 1H), 7.34–7.27 (m, 1H), 7.18–7.11 (m, 1H), 7.05 (dd,  $J = 7.5$  Hz, 1.0 Hz, 1H), 6.72–6.63 (m, 1H), 4.12 (d,  $J = 8.8$  Hz, 1H), 2.92 (s, 1H), 1.56 (s, 3H), 1.11 (s, 3H), 0.96 (s, 9H), -0.07 (s, 9H);  $^{13}\text{C}$  NMR (126 MHz,  $\text{CDCl}_3$ )  $\delta$  152.0, 144.3, 143.9, 134.9, 129.9, 127.9, 126.8, 124.5, 124.5, 124.1, 123.0, 117.4, 112.0, 76.7, 75.2, 36.9, 32.7, 30.7, 26.6, 2.5; IR (neat,  $\text{cm}^{-1}$ ): 3367, 2953, 1506, 1477, 1362, 1250, 1163, 1016, 908, 840, 753; ESI HRMS  $m/z$  ( $\text{M}+\text{Na}$ ) $^+$  calcd 433.2282,



obsd 433.2282.

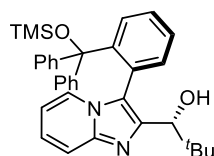

**(±)-1-(3-(2-(Diphenyl((trimethylsilyl)oxy)methyl)phenyl)imidazo[1,2-*a*]pyridin-2-yl)-2,2-dimethylpropan-1-ol (3r).** Yield = 43%; White solid; <sup>1</sup>H NMR (400 MHz, CDCl<sub>3</sub>) δ 8.27 (d, *J* = 9.1 Hz, 1H), 8.20–8.11 (m, 2H), 8.08–8.03 (m, 1H), 8.02–7.94 (m, 4H), 7.94–7.85 (m, 5H), 7.83–7.74 (m, 4H), 7.30–7.22 (m, 1H), 3.83 (d, *J* = 5.8 Hz, 1H), 2.33 (d, *J* = 5.9 Hz, 1H), 1.46 (s, 9H), 0.15 (s, 9H); <sup>13</sup>C NMR (101 MHz, CDCl<sub>3</sub>) δ 150.3, 144.4, 144.0, 143.6, 136.0, 131.0, 130.2, 128.6, 128.2, 128.1, 127.9, 127.8, 127.7, 127.2, 127.0, 124.6, 123.4, 123.0, 117.3, 111.4, 86.6, 74.5, 36.6, 26.6, 1.7; IR (neat, cm<sup>-1</sup>): 3590, 3508, 2951, 1505, 1492, 1361, 1251, 1165, 1071, 1009, 904, 840, 880, 703; ESI HRMS *m/z* (M+Na)<sup>+</sup> calcd 557.2595, obsd 557.2601.

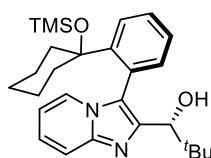

**(±)-2,2-Dimethyl-1-(3-(2-(1-((trimethylsilyl)oxy)cyclohexyl)phenyl)imidazo[1,2-*a*]pyridin-2-yl)propan-1-ol (3s).** Yield = 55%; White solid; <sup>1</sup>H NMR (400 MHz, CDCl<sub>3</sub>) δ 7.99 (dd, *J* = 8.3, 1.4 Hz, 1H), 7.64 (d, *J* = 9.1 Hz, 1H), 7.57–7.48 (m, 1H), 7.45 (d, *J* = 6.9 Hz, 1H), 7.37–7.29 (m, 1H), 7.23–7.13 (m, 1H), 7.08 (dd, *J* = 7.5, 1.5 Hz, 1H), 6.76–6.68 (m, 1H), 4.14 (d, *J* = 8.7 Hz, 1H), 2.68 (d, *J* = 8.7 Hz, 1H), 1.85–1.74 (m, 1H), 1.70–1.45 (m, 2H), 1.45–1.23 (m, 4H), 1.16–1.03 (m, 2H), 0.97 (s, 9H), 0.93–0.83 (m, 1H), -0.02 (s, 9H); <sup>13</sup>C NMR (151 MHz, CDCl<sub>3</sub>) δ 152.0, 144.6, 143.8, 134.5, 130.6, 129.8, 127.0, 124.2, 124.0, 123.2, 117.5, 112.2, 79.0, 75.1, 41.1, 36.9, 35.9, 26.6, 25.3, 22.8, 22.6, 2.6; IR (neat, cm<sup>-1</sup>): 3340, 2948, 1500, 1474, 1345, 1248, 1143, 1017, 839, 753; ESI HRMS *m/z* (M+Na)<sup>+</sup> calcd 473.2595, obsd 473.2604.

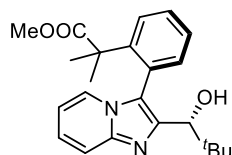

**(±)-Methyl 2-(2-(2-(1-hydroxy-2,2-dimethylpropyl)imidazo[1,2-*a*]pyridin-3-yl)phenyl)-2-methylpropanoate (3t).** Yield = 96%; White solid; <sup>1</sup>H NMR (600 MHz, CDCl<sub>3</sub>) δ 7.66–7.58 (m, 2H), 7.56–7.48 (m, 1H), 7.40 (d, *J* = 6.7 Hz, 1H), 7.38–7.31 (m, 1H), 7.21–7.13 (m, 1H), 7.08 (d, *J* = 7.3 Hz, 1H), 6.73–6.65 (m, 1H), 4.14 (d, *J* = 5.0 Hz, 1H), 3.17 (s, 1H), 2.92 (s, 3H), 1.51 (s, 3H), 1.44 (s, 3H), 0.94 (s, 9H); <sup>13</sup>C NMR (151 MHz, CDCl<sub>3</sub>) δ 177.2, 147.1,

146.2, 144.5, 134.8, 130.2, 127.7, 127.1, 126.4, 124.8, 124.5, 121.0, 117.2, 111.7, 74.6, 51.9, 47.4, 36.7, 28.6, 28.4, 26.6; IR (neat,  $\text{cm}^{-1}$ ): 3364, 2956, 1723, 1505, 1478, 1353, 1250, 1145, 1064, 1105, 990, 753; ESI HRMS  $m/z$  ( $\text{M}+\text{Na}$ )<sup>+</sup> calcd 403.1992, obsd 403.1995.

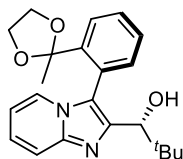

**(±)-2,2-Dimethyl-1-(3-(2-(2-methyl-1,3-dioxolan-2-yl)phenyl)imidazo[1,2-a]pyridin-2-yl)propan-1-ol (3u).** Yield = 72%; White solid; <sup>1</sup>H NMR (400 MHz,  $\text{CDCl}_3$ )  $\delta$  7.83 (dd,  $J = 7.9, 1.4$  Hz, 1H), 7.61 (d,  $J = 9.1$  Hz, 1H), 7.55–7.47 (m, 1H), 7.46–7.38 (m, 1H), 7.37 (d,  $J = 6.9$  Hz, 1H), 7.20 (dd,  $J = 7.5, 1.2$  Hz, 1H), 7.17–7.10 (m, 1H), 6.69–6.61 (m, 1H), 4.13 (d,  $J = 6.6$  Hz, 1H), 3.88 (q,  $J = 6.9$  Hz, 1H), 3.78 (q,  $J = 6.9$  Hz, 1H), 3.67 (q,  $J = 6.9$  Hz, 1H), 3.59 (q,  $J = 6.9$  Hz, 1H), 2.95 (d,  $J = 6.8$  Hz, 1H), 1.36 (s, 3H), 0.99 (s, 9H); <sup>13</sup>C NMR (126 MHz,  $\text{CDCl}_3$ )  $\delta$  145.1, 144.9, 144.1, 134.9, 129.8, 128.5, 127.1, 126.6, 124.4, 123.9, 121.7, 117.4, 111.5, 109.1, 75.1, 65.3, 64.4, 36.4, 26.7, 26.2; IR (neat,  $\text{cm}^{-1}$ ): 3453, 2951, 1681, 1653, 1505, 1478, 1361, 1263, 1043, 949, 904, 854, 801, 753; ESI HRMS  $m/z$  ( $\text{M}+\text{Na}$ )<sup>+</sup> calcd 389.1836, obsd 389.1843.

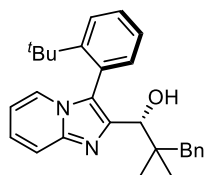

**(±)-1-(3-(2-(tert-Butyl)phenyl)imidazo[1,2-a]pyridin-2-yl)-2,2-dimethyl-3-phenylpropan-1-ol (3v).** Yield = 70%; White solid; <sup>1</sup>H NMR (400 MHz,  $\text{CDCl}_3$ )  $\delta$  7.67 (dd,  $J = 8.2, 1.3$  Hz, 2H), 7.49–7.37 (m, 2H), 7.28–7.21 (m, 1H), 7.21–7.12 (m, 4H), 7.12–7.07 (m, 2H), 7.03 (dd,  $J = 7.6, 1.6$  Hz, 1H), 6.76–6.68 (m, 1H), 4.30 (d,  $J = 7.4$  Hz, 1H), 3.08 (s, 1H), 2.72 (s, 2H), 1.11 (s, 9H), 1.02 (s, 3H), 0.76 (s, 3H); <sup>13</sup>C NMR (101 MHz,  $\text{CDCl}_3$ )  $\delta$  152.3, 144.5, 143.9, 139.3, 135.4, 131.0, 129.9, 128.4, 127.6, 126.1, 126.0, 125.7, 124.3, 124.2, 123.6, 117.4, 112.2, 74.5, 45.0, 40.8, 36.7, 31.6, 23.5, 22.7; IR (neat,  $\text{cm}^{-1}$ ): 337, 2960, 1504, 1494, 1363, 1343, 1275, 1055, 1015, 755, 739, 702; ESI HRMS  $m/z$  ( $\text{M}+\text{Na}$ )<sup>+</sup> calcd 435.2407, obsd 435.2408.

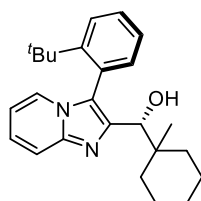

**(±)-(3-(2-(tert-Butyl)phenyl)imidazo[1,2-a]pyridin-2-yl)(1-methylcyclohexyl)methanol (3w).** Yield = 64%; White solid; <sup>1</sup>H NMR (600 MHz,  $\text{CDCl}_3$ )  $\delta$  7.68 (d,  $J = 8.2$  Hz, 1H), 7.62

(d,  $J = 9.1$  Hz, 1H), 7.49–7.42 (m, 1H), 7.38 (d,  $J = 6.8$  Hz, 1H), 7.31–7.25 (m, 1H), 7.19–7.11 (m, 1H), 7.07 (d,  $J = 7.5$  Hz, 1H), 6.72–6.66 (m, 1H), 4.21 (d,  $J = 8.9$  Hz, 1H), 2.90 (d,  $J = 19.8$  Hz, 1H), 1.62–1.54 (m, 1H), 1.53–1.44 (m, 2H), 1.44–1.33 (m, 3H), 1.34–1.23 (m, 2H), 1.16–1.05 (m, 11H), 1.01 (s, 3H);  $^{13}\text{C}$  NMR (151 MHz,  $\text{CDCl}_3$ )  $\delta$  152.3, 144.5, 143.7, 135.5, 129.9, 128.4, 126.2, 126.1, 124.2, 124.0, 123.5, 117.3, 112.0, 75.7, 39.6, 36.6, 34.3, 34.0, 31.6, 26.5, 21.9, 21.8, 19.4; IR (neat,  $\text{cm}^{-1}$ ): 3356, 2293, 1504, 1481, 1465, 1364, 1344, 1274, 1053, 1013, 738; ESI HRMS  $m/z$  ( $\text{M}+\text{Na}$ ) $^+$  calcd 427.2356, obsd 427.2369.

## 5. General Procedure for the Synthesis of Substrates

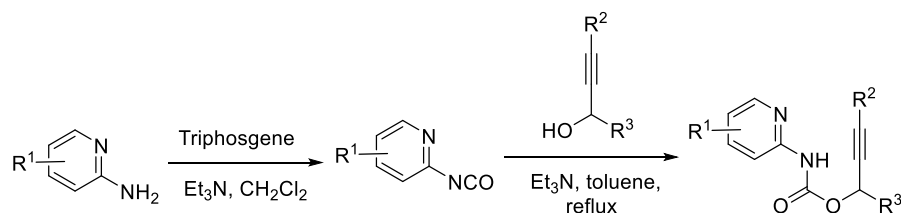

All the substrates were prepared according to the method reported previously [1]. To a solution of triphosgene (2.0 mmol, 1.0 equiv) in anhydrous  $\text{CH}_2\text{Cl}_2$  (8 mL) was added dropwise the aminoarene (4.0 mmol, 2.0 equiv) at 0 °C followed by  $\text{Et}_3\text{N}$  (4.0 mmol, 2.0 equiv). The reaction mixture was stirred at r.t. for 6 h. The solvent was then removed under reduced pressure. The residue was dissolved in toluene (6.0 mL). The propargyl alcohol (2.0 mmol, 1.0 equiv) and  $\text{Et}_3\text{N}$  (4.0 mmol, 2.0 equiv) were added. The resulting mixture was heated to reflux and maintained at this temperature for 36 h. The solvent was evaporated under reduced pressure and the residue was chromatographed through silica gel eluting with ethyl acetate/hexanes to give the product.

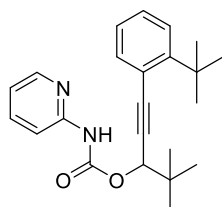

**1-(2-(*tert*-Butyl)phenyl)-4,4-dimethylpent-1-yn-3-yl pyridin-2-ylcarbamate (2a).** White solid;  $^1\text{H}$  NMR (500 MHz,  $\text{CDCl}_3$ )  $\delta$  9.39 (s, 1H), 8.42 (d,  $J = 5.0$  Hz, 1H), 8.07 (d,  $J = 8.5$  Hz, 1H), 7.75–7.68 (m, 1H), 7.50 (dd,  $J = 7.6, 1.6$  Hz, 1H), 7.36 (dd,  $J = 8.0, 1.2$  Hz, 1H), 7.27–7.23 (m, 1H), 7.17–7.09 (m, 1H), 6.99 (ddd,  $J = 7.3, 5.0, 1.1$  Hz, 1H), 5.53 (s, 1H), 1.49 (s, 9H), 1.15 (s, 9H);  $^{13}\text{C}$  NMR (126 MHz,  $\text{CDCl}_3$ )  $\delta$  153.1, 152.3, 151.7, 148.0, 138.7, 135.9, 128.7, 125.6, 121.0, 118.9, 112.8, 91.6, 87.8, 74.1, 36.1, 35.9, 30.2, 26.0; IR (neat,  $\text{cm}^{-1}$ ): 2964, 1734, 1587, 1537, 1439, 1307, 1217, 1059, 778, 757; ESI HRMS  $m/z$  ( $\text{M}+\text{Na}$ ) $^+$  calcd 387.2043, obsd 387.2056.

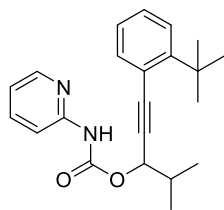

**1-(2-(*tert*-Butyl)phenyl)-4-methylpent-1-yn-3-yl pyridin-2-ylcarbamate (2b).** White solid;  $^1\text{H}$  NMR (500 MHz,  $\text{CDCl}_3$ )  $\delta$  10.36 (s, 1H), 8.51 (d,  $J = 5.0$  Hz, 1H), 8.11 (d,  $J = 8.5$  Hz, 1H), 7.76–7.67 (m, 1H), 7.56–7.48 (m, 1H), 7.37 (d,  $J = 8.0$  Hz, 1H), 7.30–7.22 (m, 1H), 7.18–7.11 (m, 1H), 6.96 (dd,  $J = 7.3, 5.0$  Hz, 1H), 5.66 (d,  $J = 5.6$  Hz, 1H), 2.32–2.19 (m, 1H), 1.51 (s, 9H), 1.16 (dd,  $J = 16.3, 6.8$  Hz, 6H);  $^{13}\text{C}$  NMR (126 MHz,  $\text{CDCl}_3$ )  $\delta$  153.1, 152.6, 151.8, 147.9, 138.7, 135.9, 128.7, 125.6, 120.9, 118.7, 112.9, 91.3, 87.9, 71.1, 35.9, 33.1, 30.2, 18.6, 18.0; ESI HRMS  $m/z$  ( $\text{M}+\text{Na}$ ) $^+$  calcd 373.1886, obsd 373.1891.

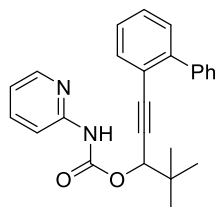

**1-([1,1'-Biphenyl]-2-yl)-4,4-dimethylpent-1-yn-3-yl pyridin-2-ylcarbamate (2c).** White solid;  $^1\text{H}$  NMR (500 MHz,  $\text{CDCl}_3$ )  $\delta$  9.28 (s, 1H), 8.43–8.29 (m, 1H), 8.09–8.00 (m, 1H), 7.75–7.67 (m, 1H), 7.58 (d,  $J = 7.7$  Hz, 1H), 7.53 (d,  $J = 7.2$  Hz, 2H), 7.41–7.32 (m, 4H), 7.33–7.22 (m, 2H), 7.00–6.93 (m, 1H), 5.38–5.28 (m, 1H), 0.94 (s, 9H);  $^{13}\text{C}$  NMR (126 MHz,  $\text{CDCl}_3$ )  $\delta$  153.0, 152.2, 148.0, 144.4, 140.6, 138.6, 133.5, 129.6, 129.4, 128.8, 128.1, 127.5, 127.1, 121.2, 118.8, 112.8, 88.6, 85.9, 73.8, 35.8, 25.8;

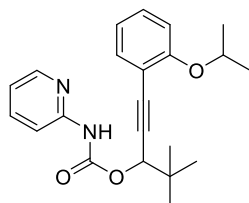

**1-(2-(*tert*-Butyl)phenyl)-4,4-dimethylpent-1-yn-3-yl pyridin-2-ylcarbamate (2d).** White solid;  $^1\text{H}$  NMR (500 MHz,  $\text{CDCl}_3$ )  $\delta$  9.91 (s, 1H), 8.51–8.44 (m, 1H), 8.10 (d,  $J = 8.4$  Hz, 1H), 7.74–7.66 (m, 1H), 7.41 (dd,  $J = 7.5, 1.5$  Hz, 1H), 7.28–7.21 (m, 1H), 6.96 (dd,  $J = 7.3, 5.1$  Hz, 1H), 6.90–6.83 (m, 2H), 5.53 (s, 1H), 4.59 (hept,  $J = 6.0$  Hz, 1H), 1.34 (t,  $J = 5.7$  Hz, 6H), 1.16 (s, 9H);  $^{13}\text{C}$  NMR (126 MHz,  $\text{CDCl}_3$ )  $\delta$  159.2, 153.2, 152.5, 148.0, 138.6, 133.8, 129.8, 120.4, 118.7, 114.2, 113.5, 112.8, 89.5, 83.1, 73.9, 71.2, 36.1, 25.9, 22.3, 22.3.

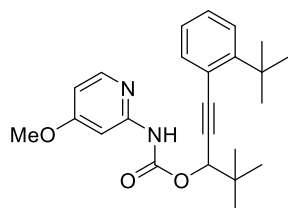

**1-(2-(*tert*-Butyl)phenyl)-4,4-dimethylpent-1-yn-3-yl (4-methoxypyridin-2-yl)carbamate (2e).** White solid; <sup>1</sup>H NMR (500 MHz, CDCl<sub>3</sub>) δ 10.33 (s, 1H), 8.28 (d, *J* = 6.0 Hz, 1H), 7.71 (s, 1H), 7.50 (dd, *J* = 7.6, 1.6 Hz, 1H), 7.39–7.32 (m, 1H), 7.27–7.23 (m, 1H), 7.17–7.09 (m, 1H), 6.53 (dd, *J* = 5.9, 2.4 Hz, 1H), 5.56 (s, 1H), 3.89 (s, 3H), 1.50 (s, 9H), 1.15 (s, 9H); <sup>13</sup>C NMR (126 MHz, CDCl<sub>3</sub>) δ 167.8, 154.4, 153.4, 151.7, 148.7, 135.9, 128.7, 125.6, 121.0, 106.9, 97.3, 91.6, 87.8, 74.0, 55.4, 36.1, 35.9, 30.2, 26.1; IR (neat, cm<sup>-1</sup>): 2965, 1731, 1601, 1585, 1538, 1481, 1223, 1046, 996, 954, 758; ESI HRMS *m/z* (M+Na)<sup>+</sup> calcd 391.2356, obsd 391.2352.

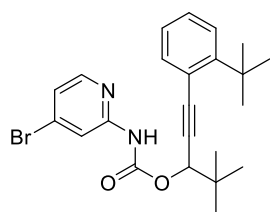

**1-(2-(*tert*-Butyl)phenyl)-4,4-dimethylpent-1-yn-3-yl (4-bromopyridin-2-yl)carbamate (2f).** White solid; <sup>1</sup>H NMR (600 MHz, CDCl<sub>3</sub>) δ 10.14 (s, 1H), 8.39 (d, *J* = 5.5 Hz, 1H), 8.21 (s, 1H), 7.51 (d, *J* = 7.6 Hz, 1H), 7.39 (d, *J* = 8.0 Hz, 1H), 7.32–7.24 (m, 1H), 7.20–7.12 (m, 1H), 7.00 (d, *J* = 4.3 Hz, 1H), 5.60 (s, 1H), 1.52 (s, 9H), 1.17 (s, 9H); <sup>13</sup>C NMR (151 MHz, CDCl<sub>3</sub>) δ 153.5, 153.0, 151.7, 148.6, 146.4, 135.9, 128.8, 125.7, 120.8, 119.3, 113.2, 91.2, 88.1, 74.4, 36.2, 35.9, 30.2, 26.0; IR (neat, cm<sup>-1</sup>): 2965, 1738, 1578, 1530, 1414, 1252, 1212, 1108, 1048, 921, 757, 719; ESI HRMS *m/z* (M+Na)<sup>+</sup> calcd 465.1148, obsd 465.1174.

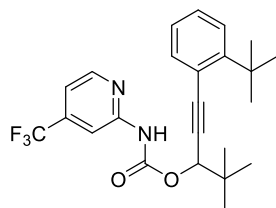

**1-(2-(*tert*-Butyl)phenyl)-4,4-dimethylpent-1-yn-3-yl(4-(trifluoromethyl)pyridin-2-yl)-carbamate (2g).** White solid; <sup>1</sup>H NMR (500 MHz, CDCl<sub>3</sub>) δ 9.21 (s, 1H), 8.54 (d, *J* = 5.2 Hz, 1H), 8.34 (s, 1H), 7.46 (d, *J* = 7.6 Hz, 1H), 7.34 (d, *J* = 8.0 Hz, 1H), 7.28–7.20 (m, 1H), 7.17 (d, *J* = 5.1 Hz, 1H), 7.15–7.07 (m, 1H), 5.52 (s, 1H), 1.46 (s, 9H), 1.13 (s, 9H); <sup>13</sup>C NMR (151 MHz, CDCl<sub>3</sub>) δ 153.0, 152.7, 151.6, 148.9, 140.8 (q, *J* = 34.0 Hz), 135.8, 128.7, 125.53 (d, *J* = 2.1 Hz), 122.7 (q, *J* = 273.5 Hz), 120.5, 114.4 (d, *J* = 3.9 Hz), 108.9, 90.9, 88.0, 74.6, 36.0, 35.8, 30.0, 25.8; <sup>19</sup>F NMR (471 MHz, CDCl<sub>3</sub>) δ -65.0; IR (neat, cm<sup>-1</sup>): 2966, 1736, 1543, 1480, 1405, 1272, 1221, 1049, 950, 757; ESI HRMS *m/z* (M+Na)<sup>+</sup> calcd 455.1917, obsd 455.1924.

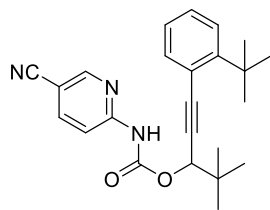

**1-(2-(*tert*-Butyl)phenyl)-4,4-dimethylpent-1-yn-3-yl (5-cyanopyridin-2-yl)carbamate (2h).**

White solid;  $^1\text{H}$  NMR (500 MHz,  $\text{CDCl}_3$ )  $\delta$  8.78 (s, 1H), 8.64 (d,  $J = 2.2$  Hz, 1H), 8.20 (d,  $J = 8.8$  Hz, 1H), 7.94 (dd,  $J = 8.8, 2.2$  Hz, 1H), 7.49 (d,  $J = 7.6$  Hz, 1H), 7.35 (d,  $J = 8.0$  Hz, 1H), 7.28–7.23 (m, 1H), 7.17–7.09 (m, 1H), 5.48 (s, 1H), 1.47 (s, 9H), 1.15 (s, 9H);  $^{13}\text{C}$  NMR (126 MHz,  $\text{CDCl}_3$ )  $\delta$  154.6, 152.3, 151.9, 151.8, 141.8, 136.0, 128.9, 125.7, 120.6, 116.9, 112.5, 104.5, 90.7, 88.5, 75.3, 36.0, 35.9, 30.2, 26.0; IR (neat,  $\text{cm}^{-1}$ ): 2967, 2230, 1742, 1600, 1530, 1481, 1387, 1225, 1200, 1051, 956, 844, 753; ESI HRMS  $m/z$  ( $\text{M}+\text{Na}$ ) $^+$  calcd 412.1995, obsd 412.2003.

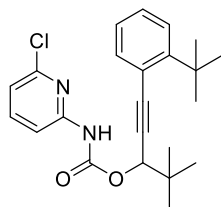

**1-(2-(*tert*-Butyl)phenyl)-4,4-dimethylpent-1-yn-3-yl (6-chloropyridin-2-yl)carbamate (2i).**

White solid;  $^1\text{H}$  NMR (600 MHz,  $\text{CDCl}_3$ )  $\delta$  7.95 (d,  $J = 8.2$  Hz, 1H), 7.71–7.63 (m, 1H), 7.62–7.54 (m, 1H), 7.50 (dd,  $J = 7.6, 1.6$  Hz, 1H), 7.37 (dd,  $J = 8.0, 1.3$  Hz, 1H), 7.31–7.23 (m, 1H), 7.19–7.11 (m, 1H), 7.04 (d,  $J = 7.7$  Hz, 1H), 5.42 (s, 1H), 1.50 (s, 9H), 1.14 (s, 9H);  $^{13}\text{C}$  NMR (151 MHz,  $\text{CDCl}_3$ )  $\delta$  152.3, 151.8, 151.5, 149.2, 141.0, 135.8, 128.7, 125.6, 125.6, 120.8, 119.0, 110.5, 91.1, 88.1, 74.7, 36.0, 35.9, 30.1, 25.9; IR (neat,  $\text{cm}^{-1}$ ): 2964, 1741, 1574, 1520, 1440, 1394, 1208, 1163, 1063, 960, 915, 790, 757; ESI HRMS  $m/z$  ( $\text{M}+\text{Na}$ ) $^+$  calcd 421.1653, obsd 421.1635.

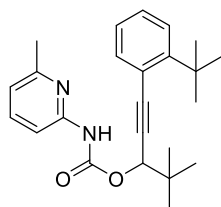

**1-(2-(*tert*-Butyl)phenyl)-4,4-dimethylpent-1-yn-3-yl (6-methylpyridin-2-yl)carbamate (2j).**

White solid;  $^1\text{H}$  NMR (500 MHz,  $\text{CDCl}_3$ )  $\delta$  8.05 (s, 1H), 7.82 (d,  $J = 8.3$  Hz, 1H), 7.63–7.56 (m, 1H), 7.49 (dd,  $J = 7.6, 1.6$  Hz, 1H), 7.38–7.33 (m, 1H), 7.29–7.21 (m, 1H), 7.17–7.09 (m, 1H), 6.86 (d,  $J = 7.5$  Hz, 1H), 5.42 (s, 1H), 2.47 (s, 3H), 1.49 (s, 9H), 1.10 (s, 9H);  $^{13}\text{C}$  NMR (126 MHz,  $\text{CDCl}_3$ )  $\delta$  157.0, 152.8, 151.7, 151.1, 138.8, 135.8, 128.6, 125.6, 121.0,

118.5, 109.5, 91.5, 87.8, 74.1, 36.0, 35.9, 30.1, 25.9, 24.1; IR (neat,  $\text{cm}^{-1}$ ): 2964, 1736, 1582, 1537, 1460, 1395, 1262, 1211, 1076, 985, 757; ESI HRMS  $m/z$  ( $\text{M}+\text{Na}$ )<sup>+</sup> calcd 401.2199, obsd 401.2209.

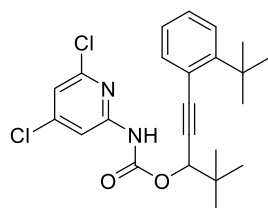

**1-(2-(*tert*-Butyl)phenyl)-4,4-dimethylpent-1-yn-3-yl (4,6-dichloropyridin-2-yl)carbamate (2k).** Pale yellow oil; <sup>1</sup>H NMR (500 MHz,  $\text{CDCl}_3$ )  $\delta$  8.02 (d,  $J = 1.5$  Hz, 1H), 7.56 (s, 1H), 7.49 (dd,  $J = 7.6, 1.6$  Hz, 1H), 7.37 (dd,  $J = 8.1, 1.3$  Hz, 1H), 7.29–7.24 (m, 1H), 7.18–7.10 (m, 1H), 7.06 (d,  $J = 1.5$  Hz, 1H), 5.41 (s, 1H), 1.49 (s, 9H), 1.13 (s, 9H); <sup>13</sup>C NMR (126 MHz,  $\text{CDCl}_3$ )  $\delta$  152.1, 151.9, 151.8, 149.9, 147.7, 135.9, 128.8, 125.7, 125.7, 120.7, 119.1, 111.0, 90.8, 88.3, 75.0, 36.0, 35.9, 30.2, 25.9; IR (neat,  $\text{cm}^{-1}$ ): 2964, 1474, 1562, 1515, 1417, 1386, 1207, 1161, 1066, 932, 825, 796, 757; ESI HRMS  $m/z$  ( $\text{M}+\text{Na}$ )<sup>+</sup> calcd 455.1264, obsd 455.1269.

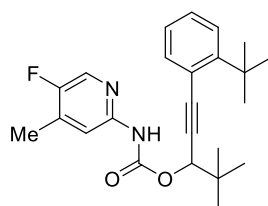

**1-(2-(*tert*-Butyl)phenyl)-4,4-dimethylpent-1-yn-3-yl(5-fluoro-4-methylpyridin-2-yl)carbamate (2l).** White solid; <sup>1</sup>H NMR (850 MHz,  $\text{CDCl}_3$ )  $\delta$  9.34 (d,  $J = 14.4$  Hz, 1H), 8.18 (s, 1H), 7.96 (s, 1H), 7.50 (dd,  $J = 7.7, 1.5$  Hz, 1H), 7.36 (d,  $J = 8.0$  Hz, 1H), 7.30–7.22 (m, 1H), 7.18–7.11 (m, 1H), 5.53 (s, 1H), 2.34 (s, 3H), 1.49 (s, 9H), 1.15 (s, 9H); <sup>13</sup>C NMR (214 MHz,  $\text{CDCl}_3$ )  $\delta$  155.6 (d,  $J = 247.6$  Hz), 153.1, 151.7, 148.2, 137.1 (d,  $J = 15.7$  Hz), 135.9, 134.5 (d,  $J = 27.3$  Hz), 128.7, 125.6 (d,  $J = 3.1$  Hz), 120.9, 114.8, 91.4, 87.9, 74.2, 36.1, 35.9, 30.2, 26.0, 15.0 (d,  $J = 2.9$  Hz); IR (neat,  $\text{cm}^{-1}$ ): 2966, 1736, 1543, 1480, 1405, 1272, 1221, 1151, 1049, 952, 757; ESI HRMS  $m/z$  ( $\text{M}+\text{H}$ )<sup>+</sup> calcd 397.2286, obsd 397.2292.

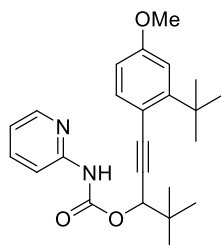

**1-(2-(*tert*-Butyl)-4-methoxyphenyl)-4,4-dimethylpent-1-yn-3-yl pyridin-2-ylcarbamate (2m).** White solid; <sup>1</sup>H NMR (400 MHz,  $\text{CDCl}_3$ )  $\delta$  9.82 (s, 1H), 8.51–8.43 (m, 1H), 8.10 (d,  $J = 8.5$  Hz, 1H), 7.76–7.69 (m, 1H), 7.46 (d,  $J = 8.5$  Hz, 1H), 7.02–6.96 (m, 1H), 6.93 (d,  $J = 2.6$  Hz, 1H), 6.68 (dd,  $J = 8.5, 2.6$  Hz, 1H), 5.56 (s, 1H), 3.82 (s, 3H), 1.50 (s, 9H), 1.15 (s,

9H);  $^{13}\text{C}$  NMR (101 MHz,  $\text{CDCl}_3$ )  $\delta$  159.7, 153.7, 153.2, 152.5, 148.0, 138.7, 137.3, 118.7, 113.2, 112.9, 112.9, 109.8, 89.9, 87.8, 74.2, 55.4, 36.1, 36.0, 30.0, 26.1; IR (neat,  $\text{cm}^{-1}$ ): 2960, 1735, 1589, 1537, 1439, 1307, 1217, 1050; ESI HRMS  $m/z$  ( $\text{M}+\text{Na}$ ) $^+$  calcd 417.2149, obsd 417.2158.

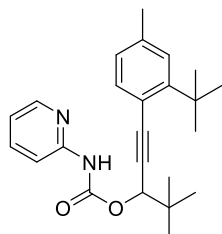

**1-(2-(*tert*-Butyl)-4-methylphenyl)-4,4-dimethylpent-1-yn-3-yl pyridin-2-ylcarbamate (2n).**

White solid;  $^1\text{H}$  NMR (500 MHz,  $\text{CDCl}_3$ )  $\delta$  9.44 (s, 1H), 8.43 (d,  $J = 4.9$  Hz, 1H), 8.07 (d,  $J = 8.4$  Hz, 1H), 7.74–7.67 (m, 1H), 7.39 (d,  $J = 7.7$  Hz, 1H), 7.16 (s, 1H), 7.01–6.92 (m, 2H), 5.53 (s, 1H), 2.34 (s, 3H), 1.48 (s, 9H), 1.14 (s, 9H);  $^{13}\text{C}$  NMR (126 MHz,  $\text{CDCl}_3$ )  $\delta$  153.1, 152.3, 151.5, 148.0, 138.7, 138.6, 135.9, 126.6, 126.3, 118.8, 117.9, 112.8, 90.8, 88.0, 74.2, 36.1, 35.8, 30.2, 26.0, 21.9; IR (neat,  $\text{cm}^{-1}$ ): 2963, 1735, 1587, 1537, 1439, 1307, 1216, 1059, 1045, 985, 962, 777; ESI HRMS  $m/z$  ( $\text{M}+\text{Na}$ ) $^+$  calcd 401.2199, obsd 401.2204.

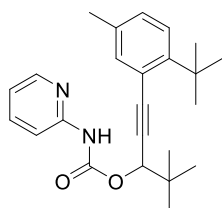

**1-(2-(*tert*-Butyl)-5-methylphenyl)-4,4-dimethylpent-1-yn-3-yl pyridin-2-ylcarbamate (2o).**

White solid;  $^1\text{H}$  NMR (400 MHz,  $\text{CDCl}_3$ )  $\delta$  9.72 (s, 1H), 8.52–8.42 (m, 1H), 8.10 (d,  $J = 8.4$  Hz, 1H), 7.77–7.70 (m, 1H), 7.34 (d,  $J = 2.0$  Hz, 1H), 7.26 (d,  $J = 8.1$  Hz, 1H), 7.08 (dd,  $J = 8.2, 2.1$  Hz, 1H), 7.02–6.98 (m, 1H), 5.56 (s, 1H), 2.29 (s, 3H), 1.49 (s, 9H), 1.17 (s, 9H);  $^{13}\text{C}$  NMR (101 MHz,  $\text{CDCl}_3$ )  $\delta$  153.2, 152.4, 148.8, 148.0, 138.7, 136.4, 135.1, 129.5, 125.6, 120.7, 118.8, 112.9, 91.1, 88.0, 74.1, 36.1, 35.6, 30.3, 26.1, 20.5; IR (neat,  $\text{cm}^{-1}$ ): 2963, 1734, 1587, 1537, 1439, 1307, 1255, 1217, 1059, 1047, 777; ESI HRMS  $m/z$  ( $\text{M}+\text{Na}$ ) $^+$  calcd 401.2199, obsd 401.2212.

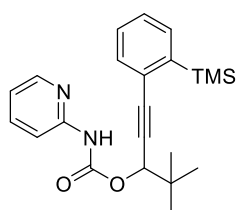



**4,4-Dimethyl-1-(2-(trimethylsilyl)phenyl)pent-1-yn-3-yl pyridin-2-ylcarbamate (2p).** White solid;  $^1\text{H}$  NMR (500 MHz,  $\text{CDCl}_3$ )  $\delta$  9.26 (s, 1H), 8.41 (dd,  $J = 5.1, 1.8$  Hz, 1H), 8.06 (d,  $J = 8.5$  Hz, 1H), 7.77–7.67 (m, 1H), 7.54–7.44 (m, 2H), 7.33 – 7.28 (m, 2H), 7.00 (dd,  $J = 7.3, 5.0$  Hz, 1H), 5.50 (s, 1H), 1.14 (s, 9H), 0.34 (s, 9H);  $^{13}\text{C}$  NMR (126 MHz,  $\text{CDCl}_3$ )  $\delta$  153.0, 152.2, 148.0, 142.6, 138.7, 134.0, 133.2, 128.8, 127.8, 127.8, 118.9, 112.9, 88.5, 87.9, 73.9, 35.9, 26.0, –0.9; IR (neat,  $\text{cm}^{-1}$ ): 2959, 1734, 1588, 1537, 1439, 1307, 1255, 1217, 1059, 1035, 840, 778, 759; ESI HRMS  $m/z$  ( $\text{M}+\text{Na}$ ) $^+$  calcd 403.1812, obsd 403.1827.

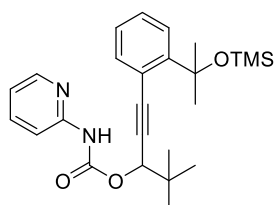

**4,4-Dimethyl-1-(2-(2-((trimethylsilyloxy)propan-2-yl)phenyl)phenyl)pent-1-yn-3-yl pyridin-2-ylcarbamate (2q).** White solid;  $^1\text{H}$  NMR (600 MHz,  $\text{CDCl}_3$ )  $\delta$  9.74 (s, 1H), 8.46 (s, 1H), 8.09 (d,  $J = 6.7$  Hz, 1H), 7.75–7.68 (m, 2H), 7.48 (d,  $J = 7.6$  Hz, 1H), 7.34–7.27 (m, 1H), 7.21–7.13 (m, 1H), 7.02–6.96 (m, 1H), 5.53 (s, 1H), 1.79 (s, 3H), 1.78 (s, 3H), 1.14 (s, 9H), 0.15 (s, 9H);  $^{13}\text{C}$  NMR (151 MHz,  $\text{CDCl}_3$ )  $\delta$  153.1, 152.4, 151.3, 148.0, 138.7, 135.2, 128.7, 126.3, 125.5, 118.8, 118.7, 112.9, 91.0, 87.1, 76.2, 74.0, 36.1, 30.6, 30.6, 26.0, 2.7; IR (neat,  $\text{cm}^{-1}$ ): 2957, 1735, 1588, 1537, 1439, 1308, 1252, 1217, 1177, 1040, 995, 840, 777, 759; ESI HRMS  $m/z$  ( $\text{M}+\text{Na}$ ) $^+$  calcd 461.2231, obsd 461.2235.

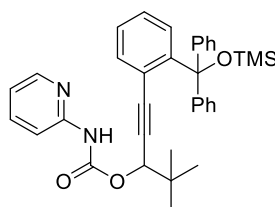

**1-(2-(Diphenyl((trimethylsilyloxy)methyl)phenyl)-4,4-dimethylpent-1-yn-3-yl pyridin-2-ylcarbamate (2r).** White solid;  $^1\text{H}$  NMR (600 MHz,  $\text{CDCl}_3$ )  $\delta$  8.48 (s, 1H), 8.36–8.32 (m, 1H), 8.04 (d,  $J = 8.5$  Hz, 1H), 7.88 (dd,  $J = 8.1, 1.3$  Hz, 1H), 7.75–7.69 (m, 1H), 7.56–7.49 (m, 4H), 7.41 (dd,  $J = 7.6, 1.5$  Hz, 1H), 7.36–7.28 (m, 1H), 7.25–7.15 (m, 5H), 7.16–7.09 (m, 2H), 7.01–6.96 (m, 1H), 5.08 (s, 1H), 0.89 (s, 9H), –0.20 (s, 9H);  $^{13}\text{C}$  NMR (151 MHz,  $\text{CDCl}_3$ )  $\delta$  152.5, 152.1, 148.8, 148.1, 145.4, 145.4, 138.6, 135.6, 128.7, 128.7, 128.3, 128.2, 127.7, 127.1, 127.0, 126.9, 121.8, 118.9, 112.6, 92.7, 87.0, 84.4, 73.4, 35.9, 25.9, 1.8; IR (neat,  $\text{cm}^{-1}$ ): 2959, 1732, 1587, 1439, 1307, 1251, 1215, 1060, 885, 839, 758, 700; ESI HRMS  $m/z$  ( $\text{M}+\text{Na}$ ) $^+$  calcd 585.2544, obsd 585.2543.

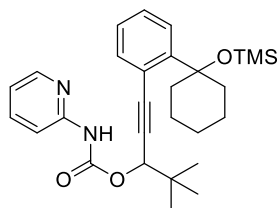

**4,4-Dimethyl-1-(2-(1-((trimethylsilyl)oxy)cyclohexyl)phenyl)pent-1-yn-3-ylpyridin-2-ylcarbamate (2s).** White solid;  $^1\text{H NMR}$  (600 MHz,  $\text{CDCl}_3$ )  $\delta$  10.11–9.94 (m, 1H), 8.52–8.47 (m, 1H), 8.11 (d,  $J = 8.4$  Hz, 1H), 7.74–7.68 (m, 1H), 7.50 (dd,  $J = 7.6, 1.5$  Hz, 1H), 7.42 (d,  $J = 7.9$  Hz, 1H), 7.30–7.22 (m, 1H), 7.21–7.13 (m, 1H), 7.00–6.95 (m, 1H), 5.56 (s, 1H), 2.40 (d,  $J = 12.0$  Hz, 1H), 2.33 (d,  $J = 13.0$  Hz, 1H), 1.93–1.73 (m, 4H), 1.67–1.60 (m, 1H), 1.58–1.50 (m, 2H), 1.30–1.21 (m, 1H), 1.15 (s, 9H), -0.08 (s, 9H);  $^{13}\text{C NMR}$  (151 MHz,  $\text{CDCl}_3$ )  $\delta$  153.2, 152.6, 149.9, 147.9, 138.6, 136.0, 128.2, 126.6, 125.5, 121.4, 118.7, 112.9, 91.2, 87.4, 76.3, 74.1, 37.9, 37.7, 36.1, 26.1, 25.9, 22.5, 2.3; IR (neat,  $\text{cm}^{-1}$ ): 2928, 1735, 1588, 1537, 1439, 1307, 1216, 1049, 1024, 838, 777, 755; ESI HRMS  $m/z$  ( $\text{M}+\text{Na}$ ) $^+$  calcd 501.2544, obsd 501.2525.

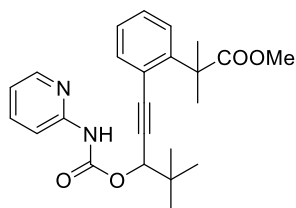

**Methyl 2-(2-(4,4-dimethyl-3-((pyridin-2-ylcarbamoyl)oxy)pent-1-yn-1-yl)phenyl)-2-methylpropanoate (2t).** White solid;  $^1\text{H NMR}$  (600 MHz,  $\text{CDCl}_3$ )  $\delta$  9.46 (s, 1H), 8.49–8.45 (m, 1H), 8.08 (d,  $J = 8.4$  Hz, 1H), 7.74–7.70 (m, 1H), 7.50 (dd,  $J = 7.7, 1.4$  Hz, 1H), 7.39–7.32 (m, 2H), 7.27–7.19 (m, 1H), 7.03–6.99 (m, 1H), 5.51 (s, 1H), 3.65 (s, 3H), 1.65 (s, 3H), 1.63 (s, 3H), 1.13 (s, 9H);  $^{13}\text{C NMR}$  (151 MHz,  $\text{CDCl}_3$ )  $\delta$  177.3, 153.0, 152.4, 148.1, 146.5, 138.6, 134.4, 128.8, 126.6, 125.1, 121.8, 118.8, 112.8, 91.3, 85.0, 73.6, 52.4, 47.2, 36.0, 26.7, 26.6, 26.0; IR (neat,  $\text{cm}^{-1}$ ): 2970, 1736, 1587, 1537, 1439, 1307, 1254, 1217, 1145, 1059, 995, 778, 758; ESI HRMS  $m/z$  ( $\text{M}+\text{Na}$ ) $^+$  calcd 431.1941, obsd 431.1923.

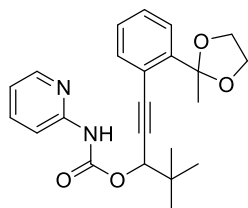

**4,4-Dimethyl-1-(2-(2-methyl-1,3-dioxolan-2-yl)phenyl)pent-1-yn-3-ylpyridin-2-ylcarbamate (2u).** White solid;  $^1\text{H NMR}$  (500 MHz,  $\text{CDCl}_3$ )  $\delta$  9.34 (s, 1H), 8.47–8.41 (m, 1H), 8.08 (d,

$J = 8.6$  Hz, 1H), 7.73–7.68 (m, 1H), 7.57 (dd,  $J = 7.8, 1.4$  Hz, 1H), 7.50 (dd,  $J = 7.6, 1.5$  Hz, 1H), 7.29–7.26 (m, 1H), 7.26–7.20 (m, 1H), 7.00–6.96 (m, 1H), 5.52 (s, 1H), 4.00–3.97 (m, 2H), 3.77–3.71 (m, 2H), 1.79 (s, 3H), 1.15 (s, 9H);  $^{13}\text{C}$  NMR (126 MHz,  $\text{CDCl}_3$ )  $\delta$  153.1, 152.3, 148.1, 144.7, 138.6, 134.9, 128.3, 127.8, 125.9, 120.2, 118.8, 112.8, 108.8, 90.3, 85.5, 74.0, 64.4, 64.4, 36.2, 26.1, 25.9; IR (neat,  $\text{cm}^{-1}$ ): 2966, 1731, 1588, 1537, 1439, 1308, 1218, 1036, 995; ESI HRMS  $m/z$  ( $\text{M}+\text{Na}$ ) $^+$  calcd 417.1785, obsd 417.1766.

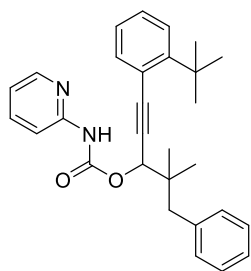

**1-(2-(*tert*-Butyl)phenyl)-4,4-dimethyl-5-phenylpent-1-yn-3-yl pyridin-2-ylcarbamate (2v).**

White solid;  $^1\text{H}$  NMR (400 MHz,  $\text{CDCl}_3$ )  $\delta$  9.67 (s, 1H), 8.50 (d,  $J = 5.0$  Hz, 1H), 8.13 (d,  $J = 8.5$  Hz, 1H), 7.80–7.70 (m, 1H), 7.57 (dd,  $J = 7.5, 1.6$  Hz, 1H), 7.41 (dd,  $J = 8.0, 1.3$  Hz, 1H), 7.38–7.20 (m, 6H), 7.22–7.14 (m, 1H), 7.07–6.98 (m, 1H), 5.62 (s, 1H), 2.99–2.79 (m, 2H), 1.56 (s, 9H), 1.16 (s, 3H), 1.14 (s, 3H);  $^{13}\text{C}$  NMR (101 MHz,  $\text{CDCl}_3$ )  $\delta$  152.8, 152.2, 151.6, 147.8, 138.6, 137.7, 135.8, 130.7, 128.6, 128.0, 126.3, 125.5, 120.7, 118.7, 112.8, 91.3, 88.6, 73.3, 44.4, 39.7, 35.8, 30.1, 23.3, 23.0; IR (neat,  $\text{cm}^{-1}$ ): 2964, 2922, 1735, 1586, 1536, 1438, 1307, 1217, 1058, 1034, 995, 778, 757, 702; ESI HRMS  $m/z$  ( $\text{M}+\text{Na}$ ) $^+$  calcd 463.2356, obsd 463.2365.

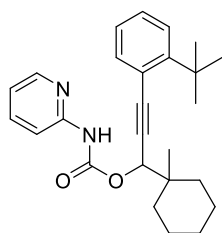

**3-(2-(*tert*-Butyl)phenyl)-1-(1-methylcyclohexyl)prop-2-yn-1-yl pyridin-2-ylcarbamate**

**(2w).** White solid;  $^1\text{H}$  NMR (400 MHz,  $\text{CDCl}_3$ )  $\delta$  9.36 (s, 1H), 8.48–8.38 (m, 1H), 8.07 (d,  $J = 8.4$  Hz, 1H), 7.74–7.68 (m, 1H), 7.50 (dd,  $J = 7.6, 1.6$  Hz, 1H), 7.36 (dd,  $J = 8.1, 1.3$  Hz, 1H), 7.27–7.22 (m, 1H), 7.17–7.09 (m, 1H), 7.01–6.95 (m, 1H), 5.66 (s, 1H), 1.70–1.44 (m, 18H), 1.34–1.26 (m, 1H), 1.15 (s, 3H);  $^{13}\text{C}$  NMR (151 MHz,  $\text{CDCl}_3$ )  $\delta$  153.2, 152.3, 151.7, 148.0, 138.7, 135.9, 128.6, 125.6, 121.0, 118.8, 112.8, 91.4, 88.3, 73.7, 38.6, 35.9, 34.3, 33.7, 30.2, 26.3, 21.8, 21.8, 20.4; IR (neat,  $\text{cm}^{-1}$ ): 2929, 2862, 1734, 1587, 1537, 1438, 1307, 1254, 1216, 1058, 1034, 994, 777, 757; ESI HRMS  $m/z$  ( $\text{M}+\text{Na}$ ) $^+$  calcd 427.2356, obsd 427.2369.

**6. X-ray Crystallography of 3k**

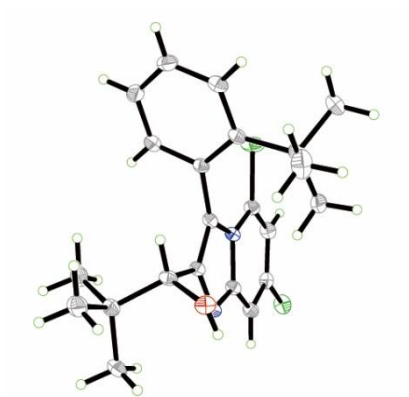

**Table 1 Crystal data and structure refinement for 3k.**

|                                             |                                                                  |
|---------------------------------------------|------------------------------------------------------------------|
| Identification code                         | 3k                                                               |
| Empirical formula                           | C <sub>22</sub> H <sub>26</sub> Cl <sub>2</sub> N <sub>2</sub> O |
| Formula weight                              | 405.35                                                           |
| Temperature/K                               | 273.15                                                           |
| Crystal system                              | monoclinic                                                       |
| Space group                                 | P2 <sub>1</sub> /n                                               |
| a/Å                                         | 12.703(3)                                                        |
| b/Å                                         | 9.799(2)                                                         |
| c/Å                                         | 16.767(4)                                                        |
| α/°                                         | 90                                                               |
| β/°                                         | 97.536(4)                                                        |
| γ/°                                         | 90                                                               |
| Volume/Å <sup>3</sup>                       | 2069.0(9)                                                        |
| Z                                           | 4                                                                |
| ρ <sub>calc</sub> /cm <sup>3</sup>          | 1.301                                                            |
| μ/mm <sup>-1</sup>                          | 0.328                                                            |
| F(000)                                      | 856.0                                                            |
| Crystal size/mm <sup>3</sup>                | 0.5 × 0.3 × 0.3                                                  |
| Radiation                                   | MoKα (λ = 0.71073)                                               |
| 2θ range for data collection/°              | 3.792 to 57.078                                                  |
| Index ranges                                | -16 ≤ h ≤ 17, -13 ≤ k ≤ 13, -21 ≤ l ≤ 22                         |
| Reflections collected                       | 15889                                                            |
| Independent reflections                     | 4747 [R <sub>int</sub> = 0.0310, R <sub>sigma</sub> = 0.0295]    |
| Data/restraints/parameters                  | 4747/0/251                                                       |
| Goodness-of-fit on F <sup>2</sup>           | 1.149                                                            |
| Final R indexes [I ≥ 2σ (I)]                | R <sub>1</sub> = 0.0518, wR <sub>2</sub> = 0.1341                |
| Final R indexes [all data]                  | R <sub>1</sub> = 0.0551, wR <sub>2</sub> = 0.1385                |
| Largest diff. peak/hole / e Å <sup>-3</sup> | 0.35/-0.24                                                       |

## 7. References

[1] Hou, Z.-W.; Mao, Z.-Y.; Melcamu, Y. Y.; Lu, X.; Xu, H.-C. *Angew. Chem. Int. Ed.* **2018**, *57*, 1636-1639.

## 8. NMR Spectra for New Compounds

### Compound 3a

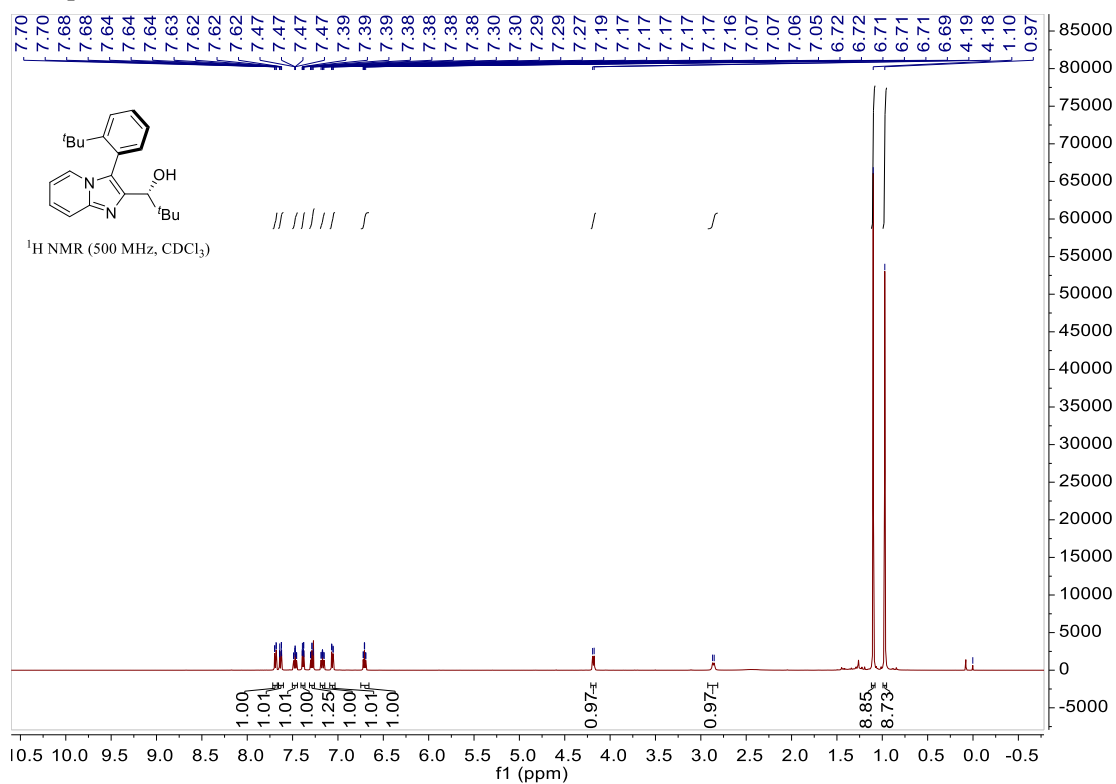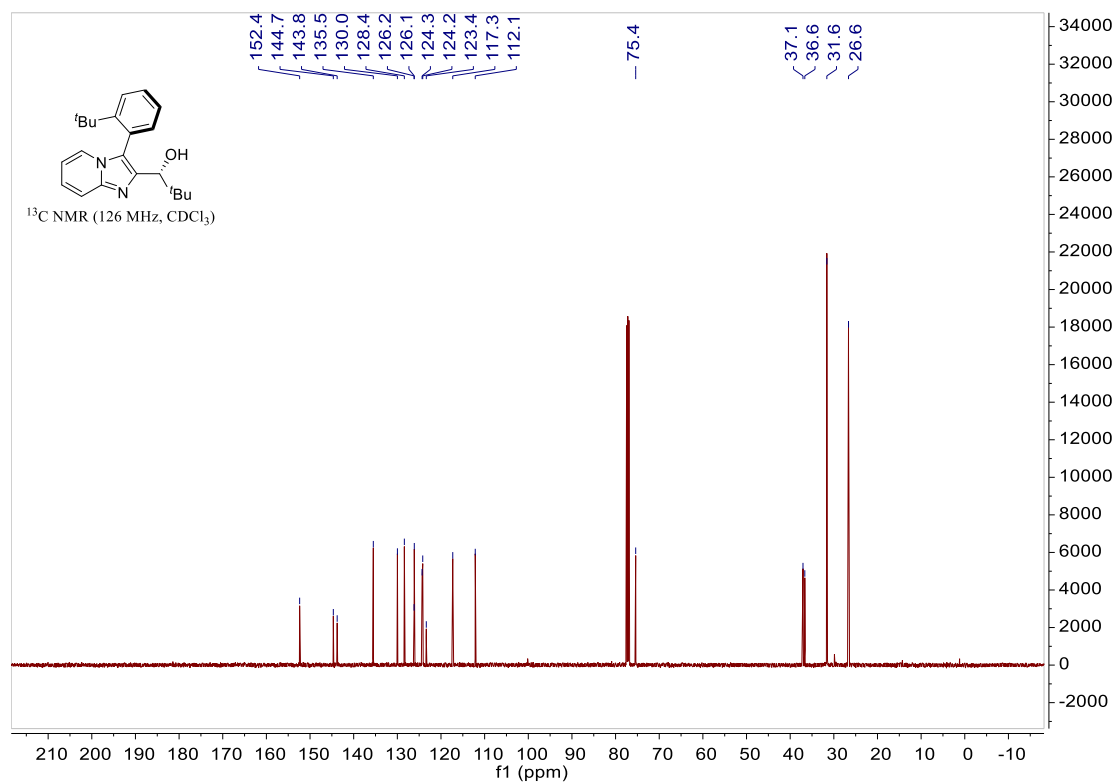

### Compound 3e

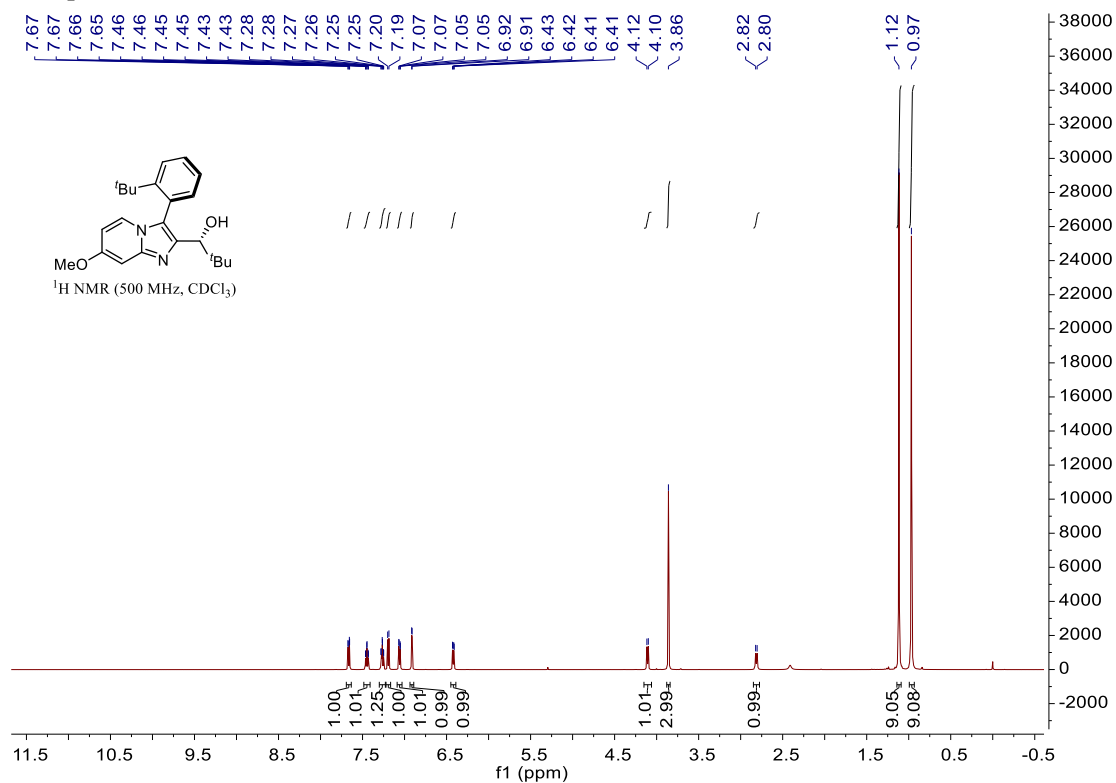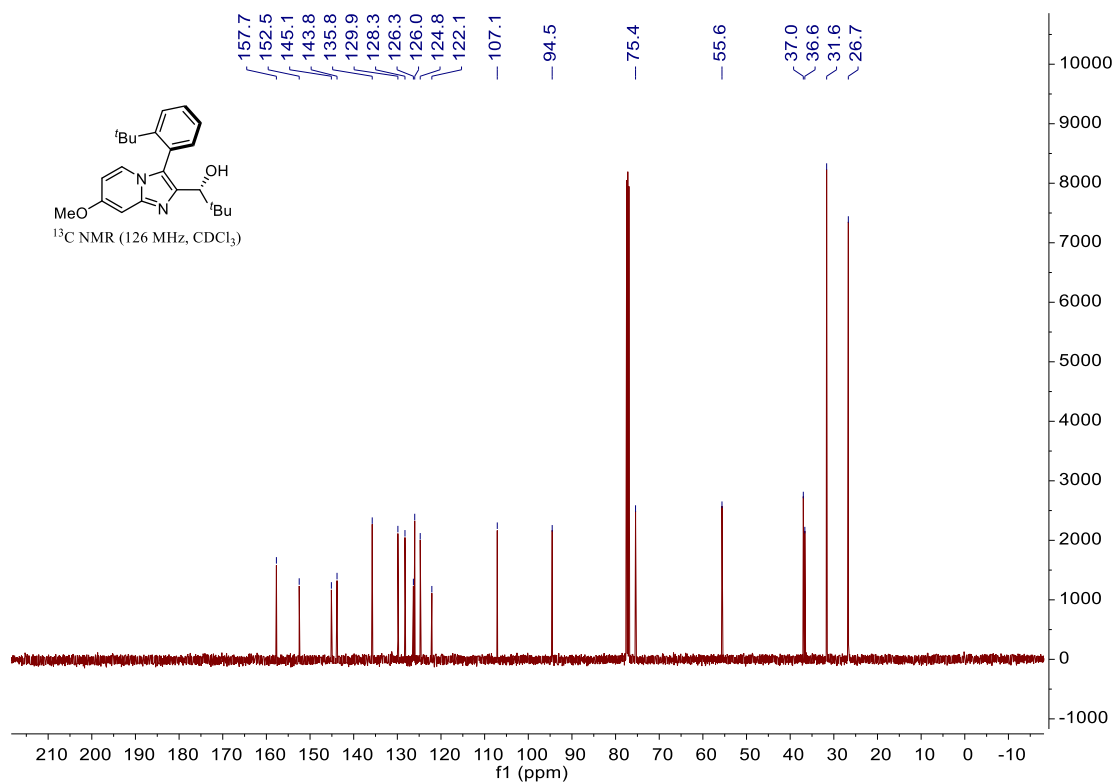

Compound 3f

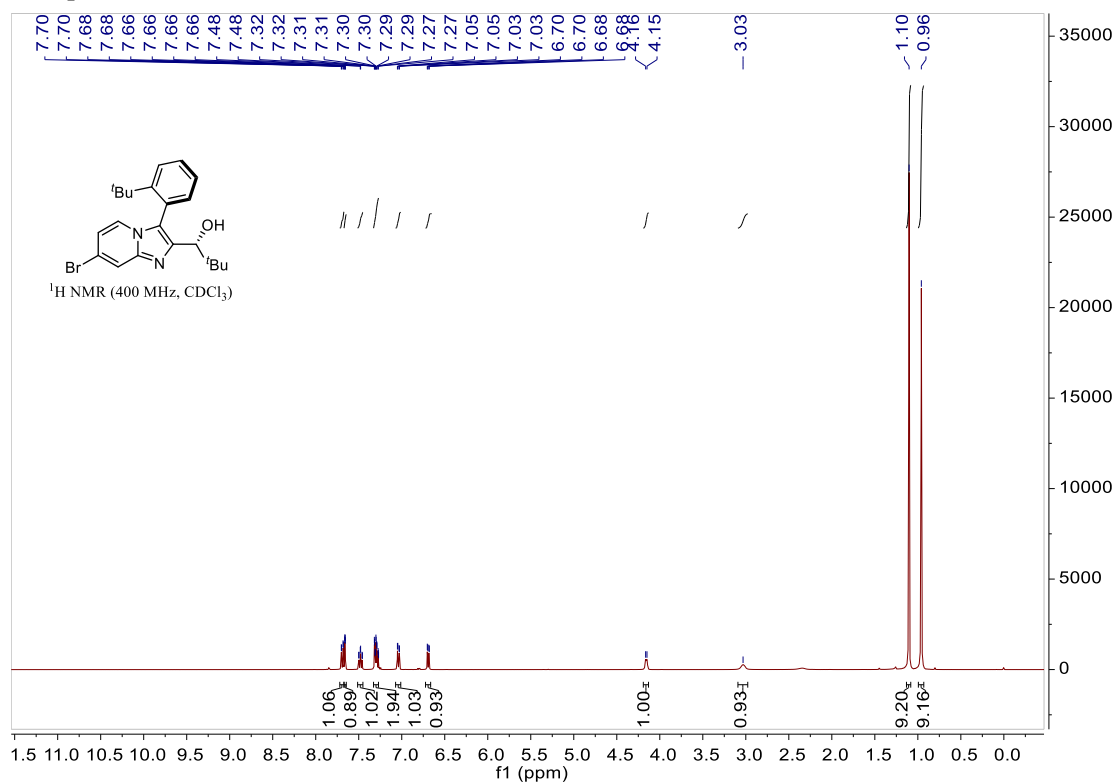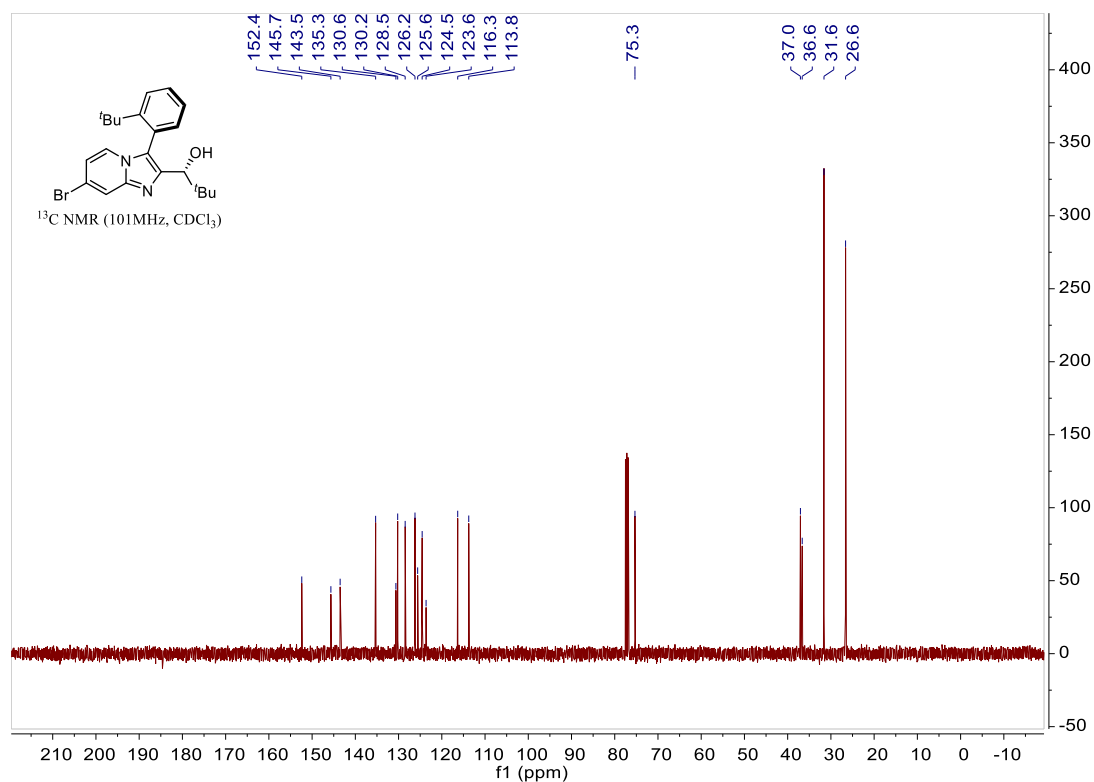



Compound **3g**

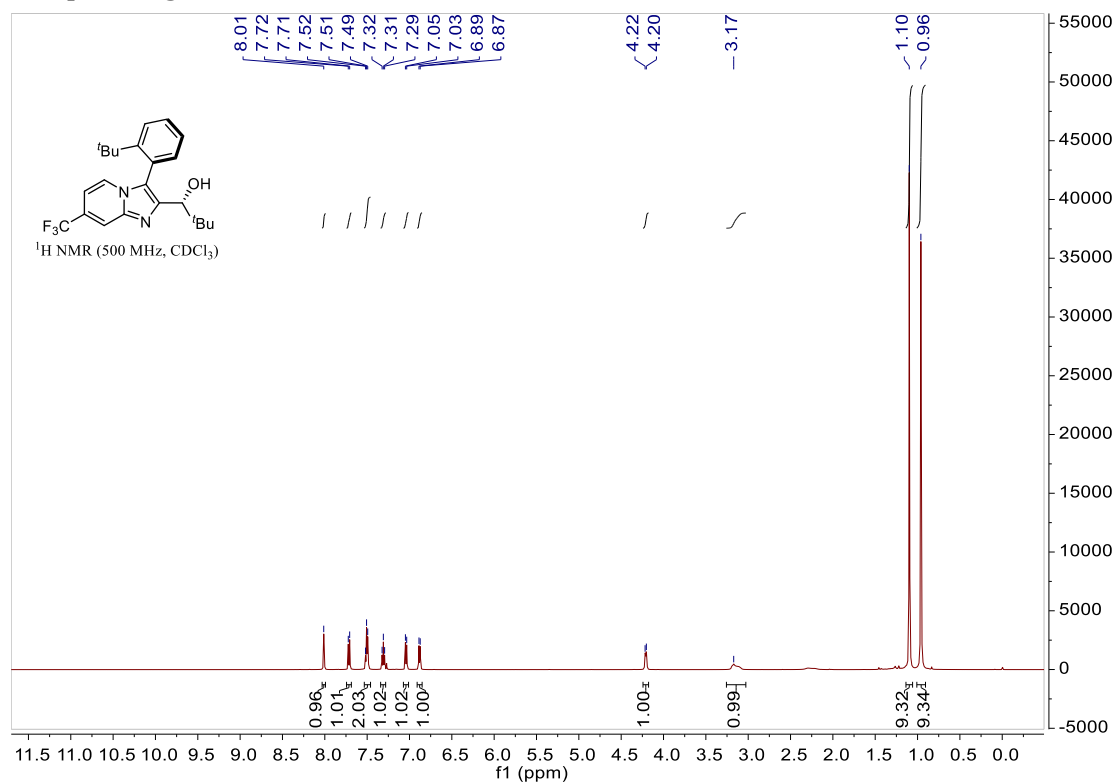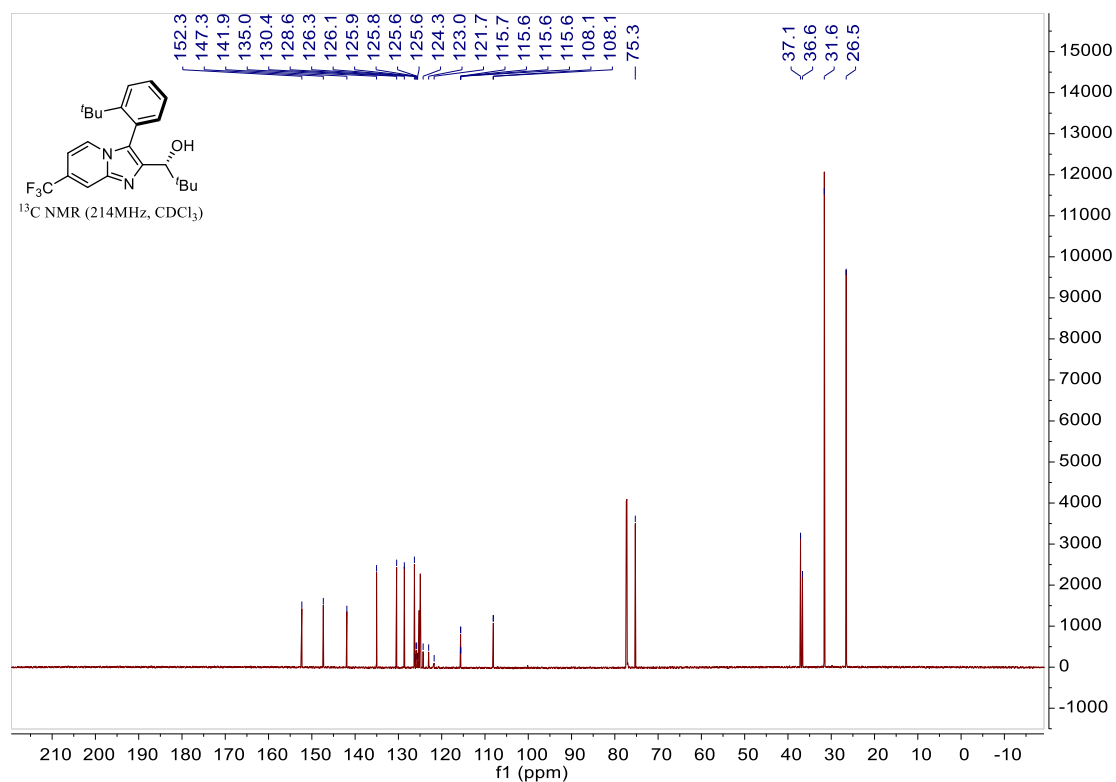

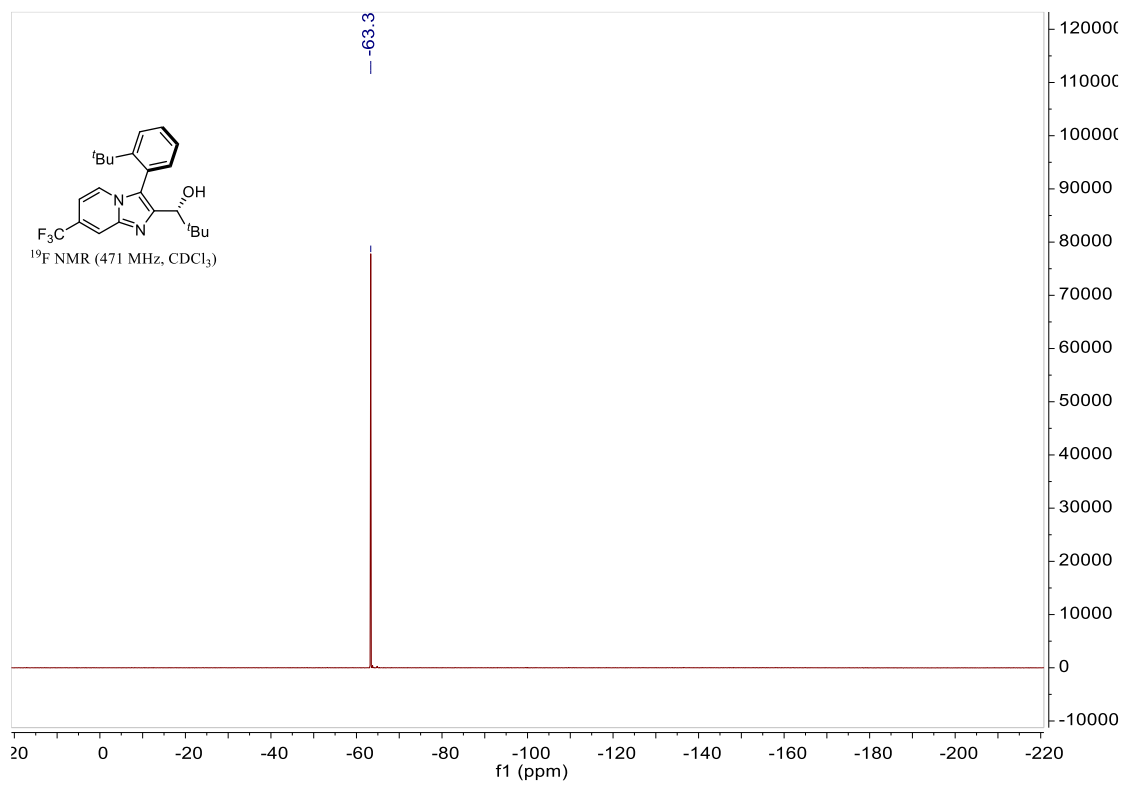

### Compound 3h

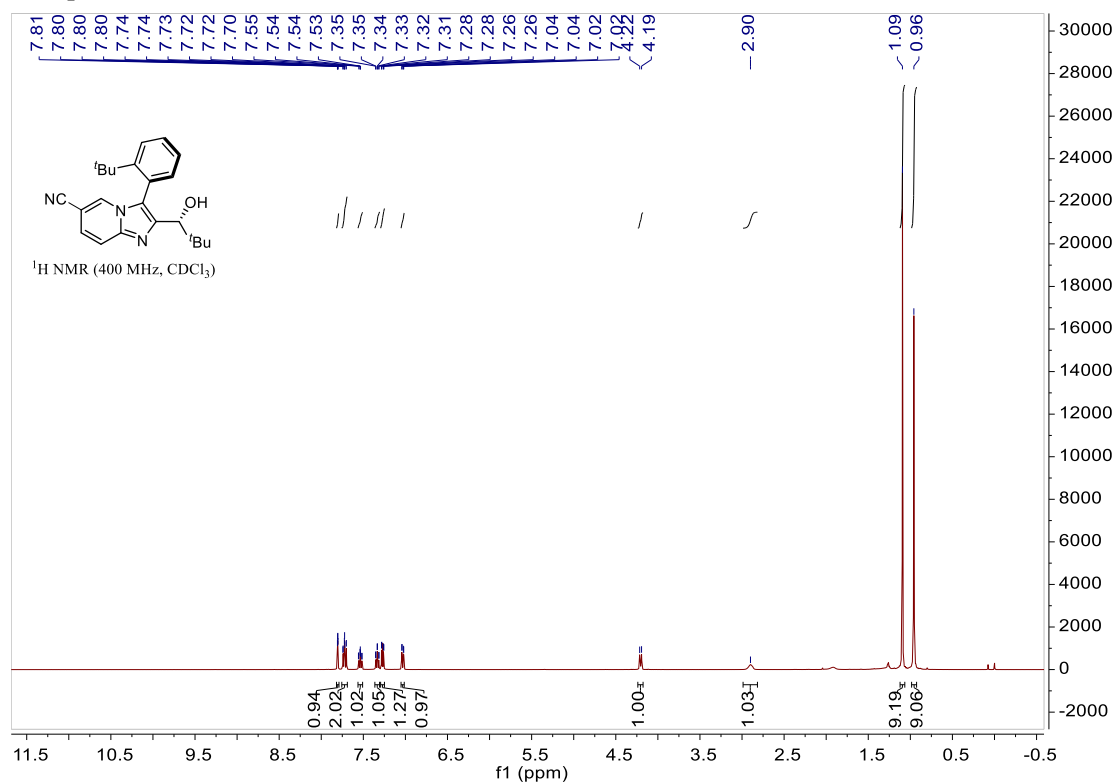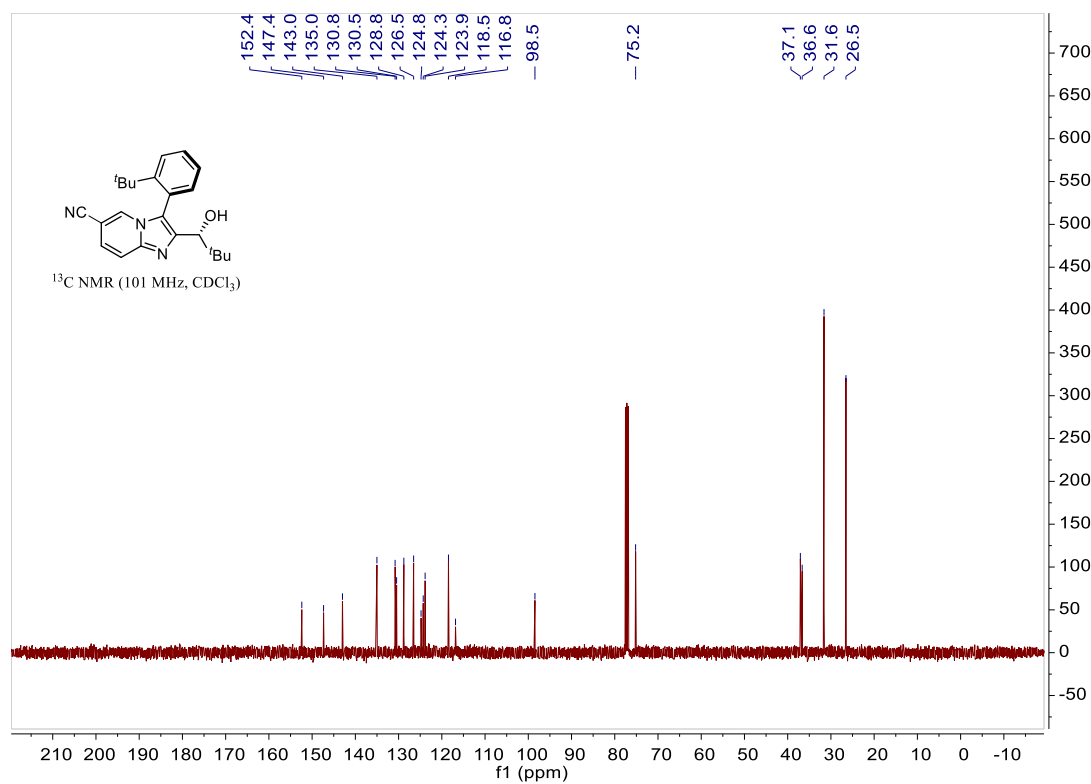

Compound 3i

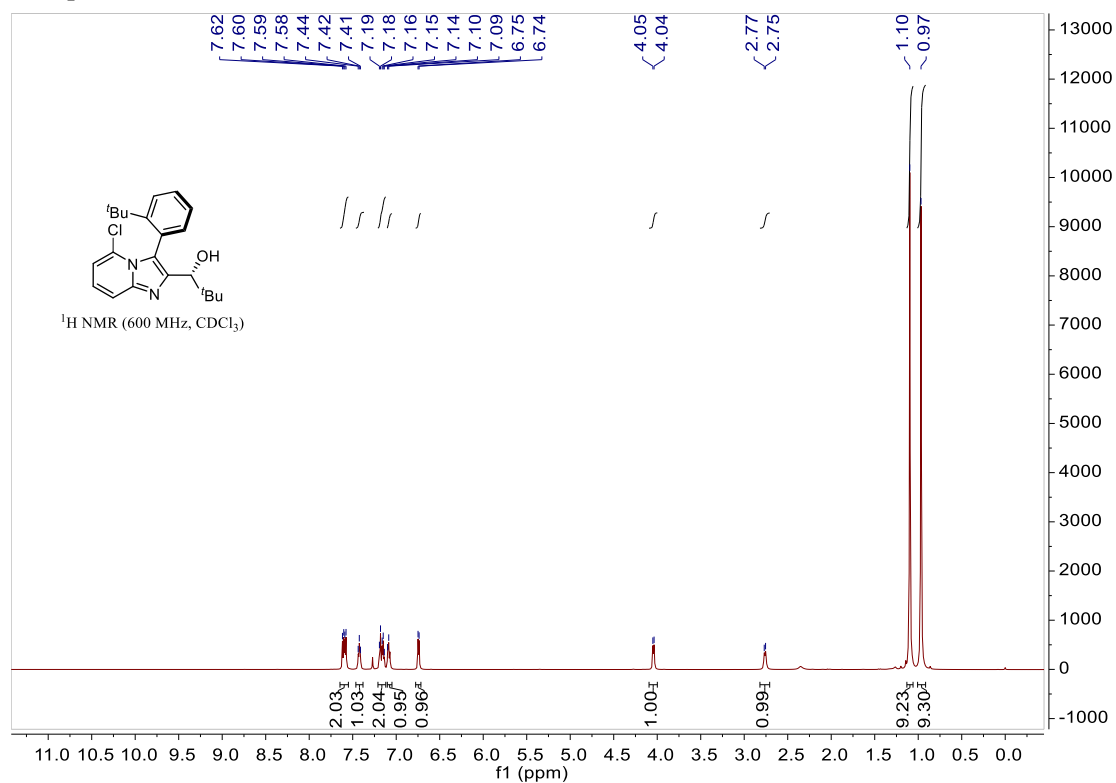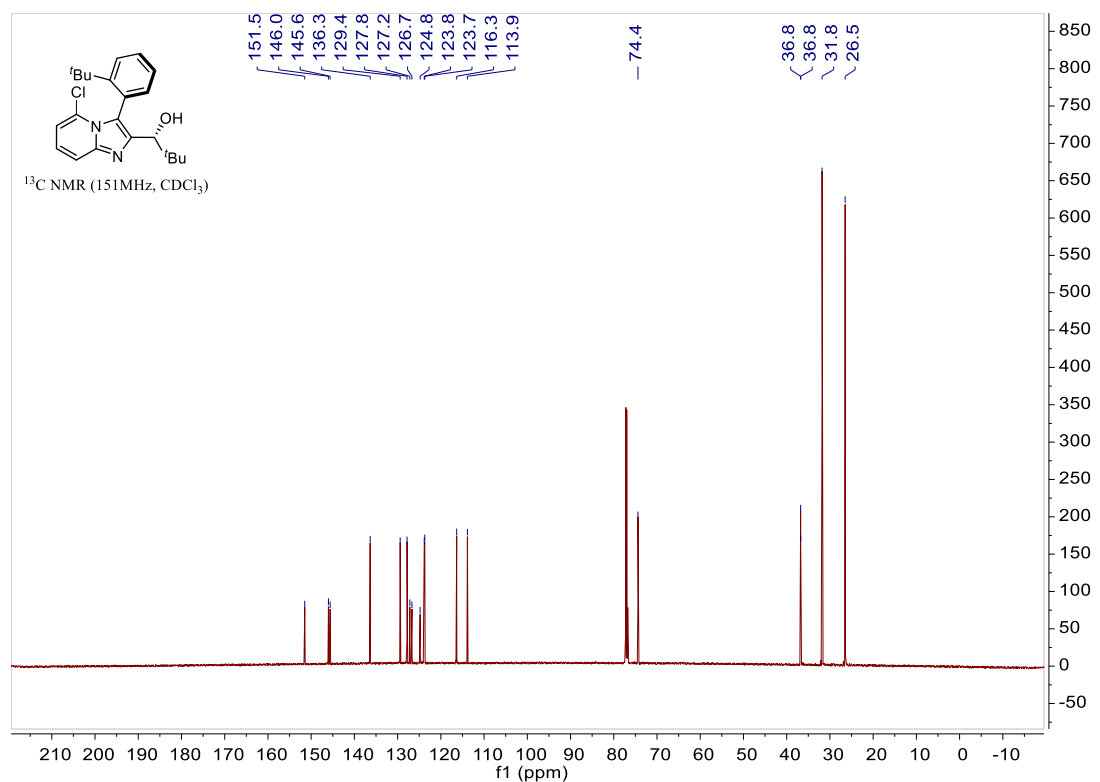

### Compound 3j

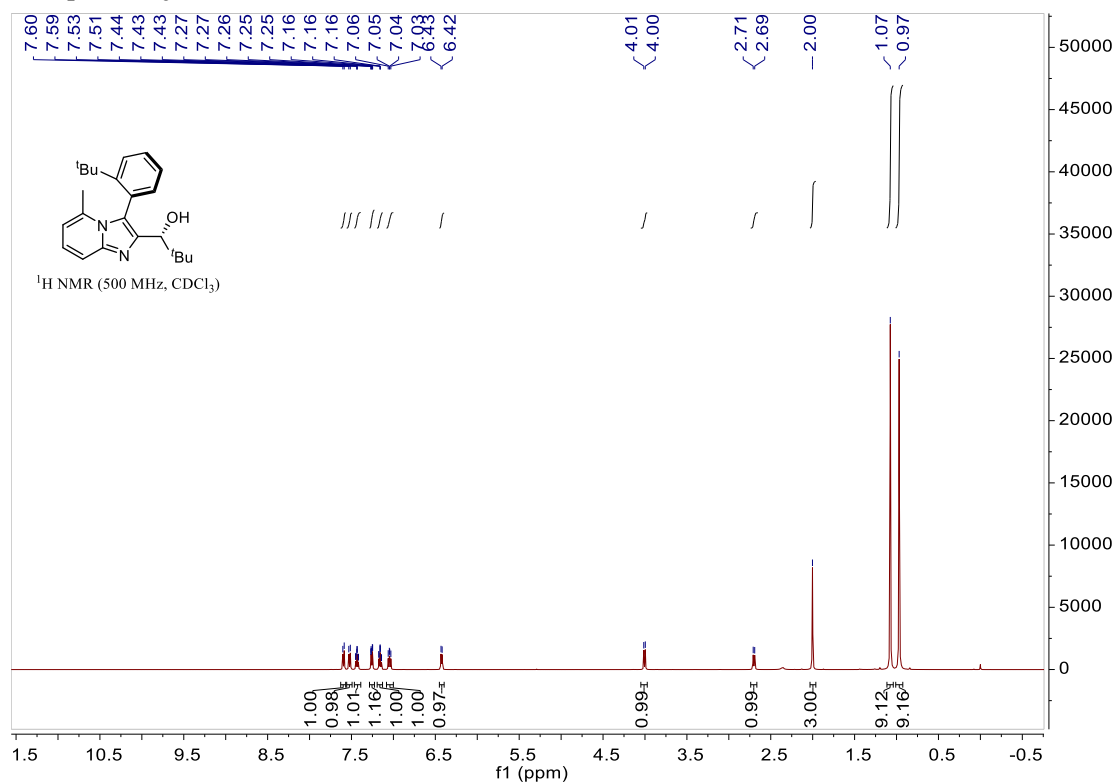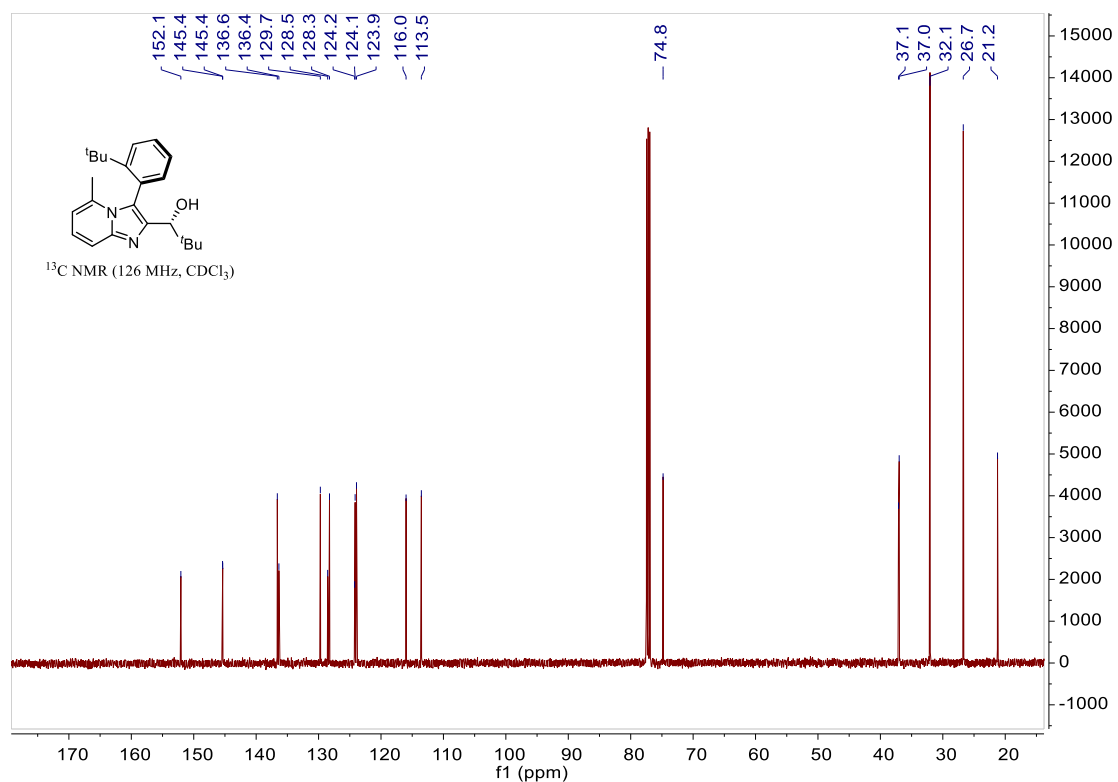

### Compound 3k

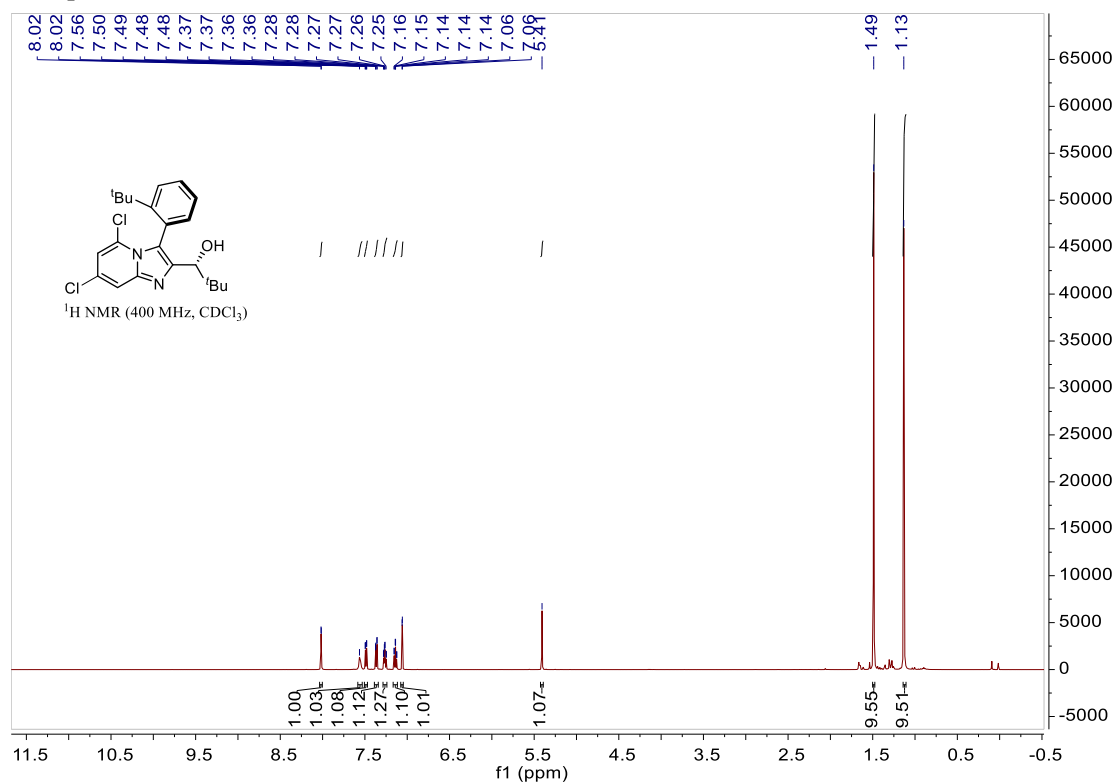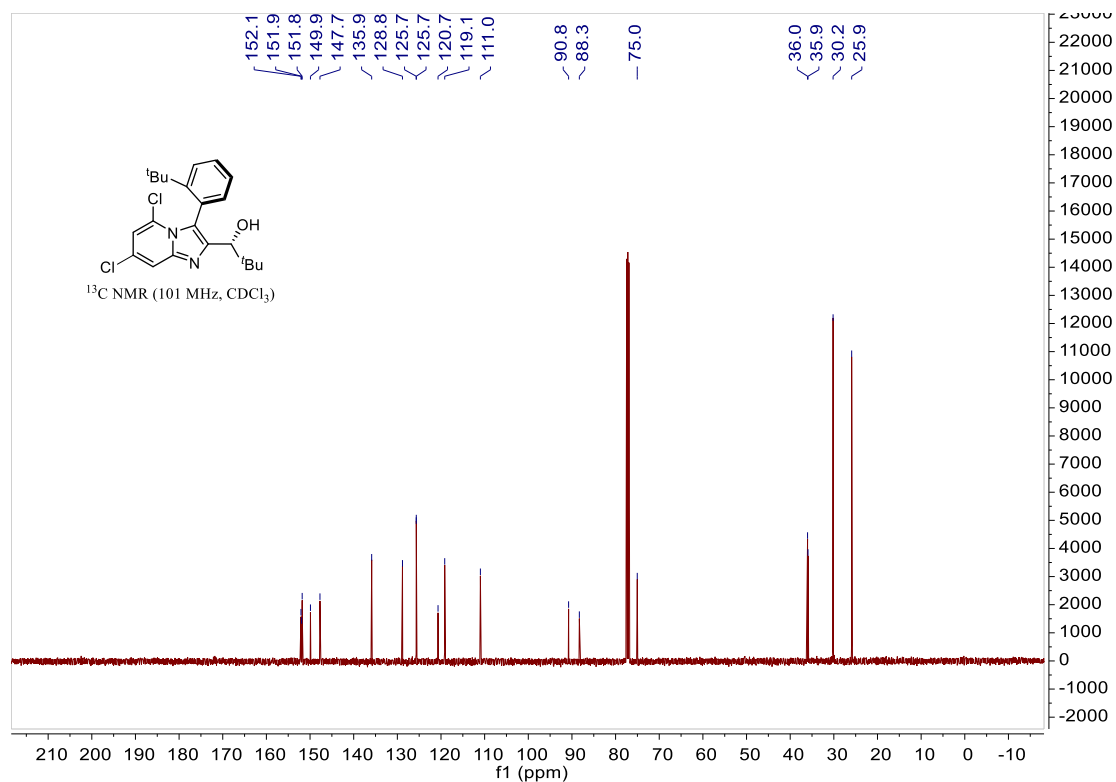

Compound 31

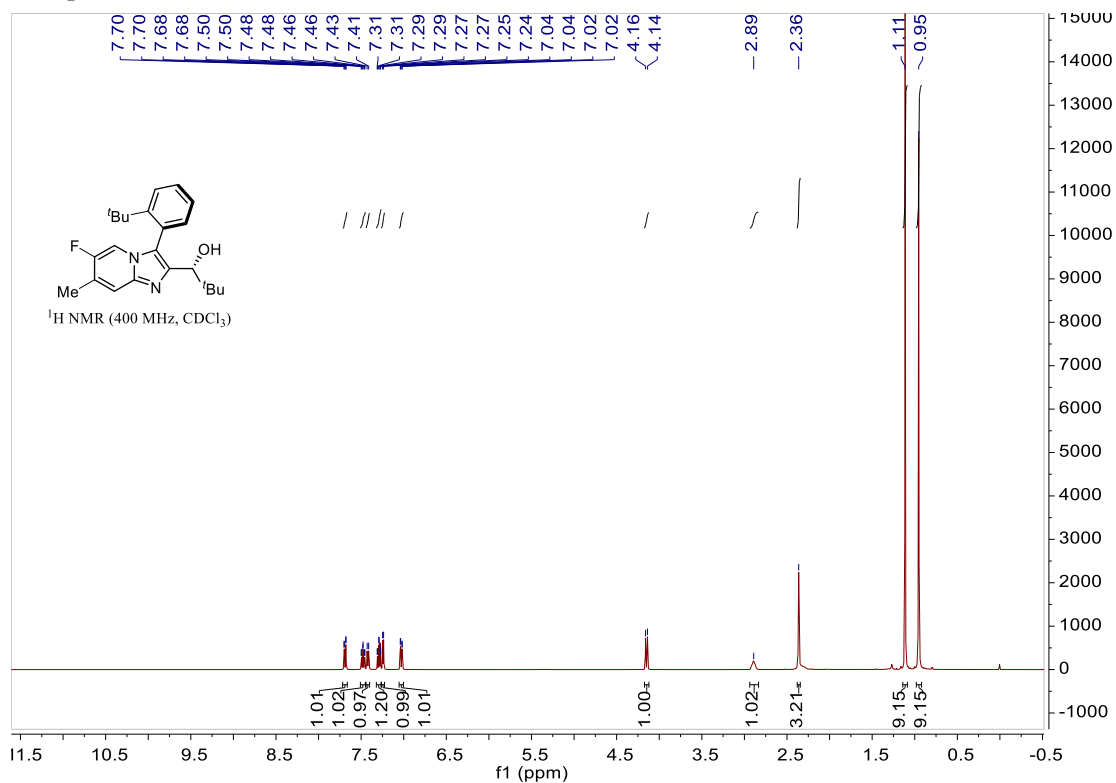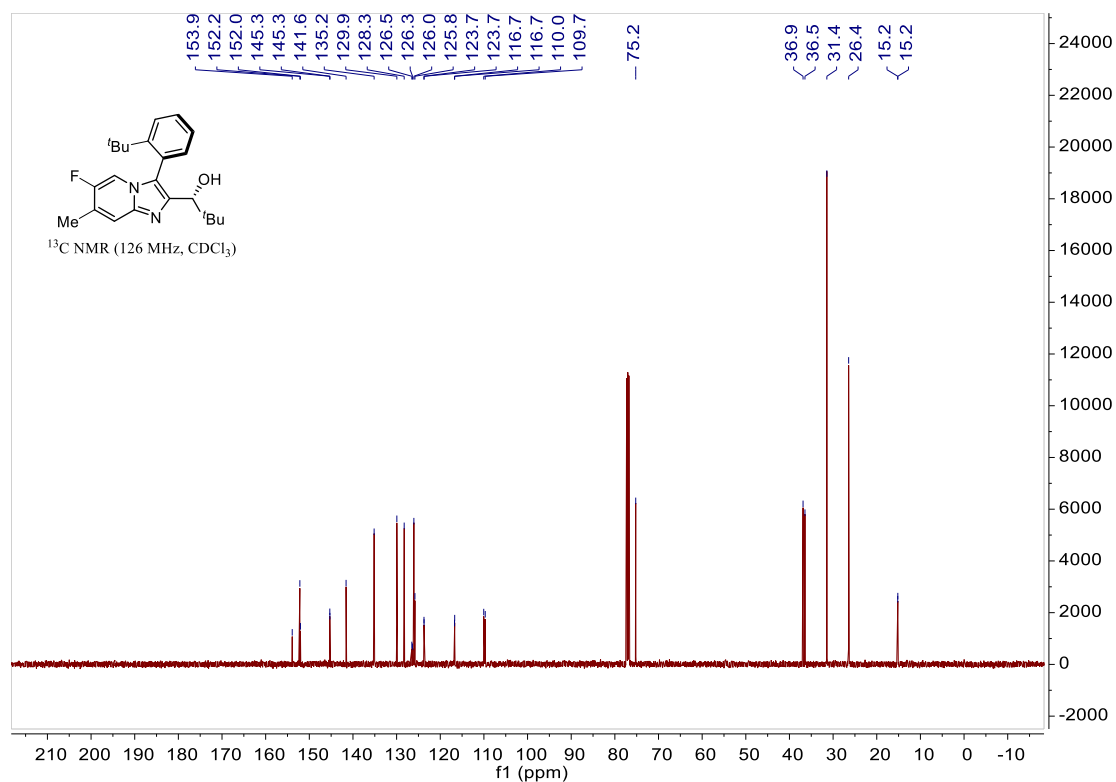

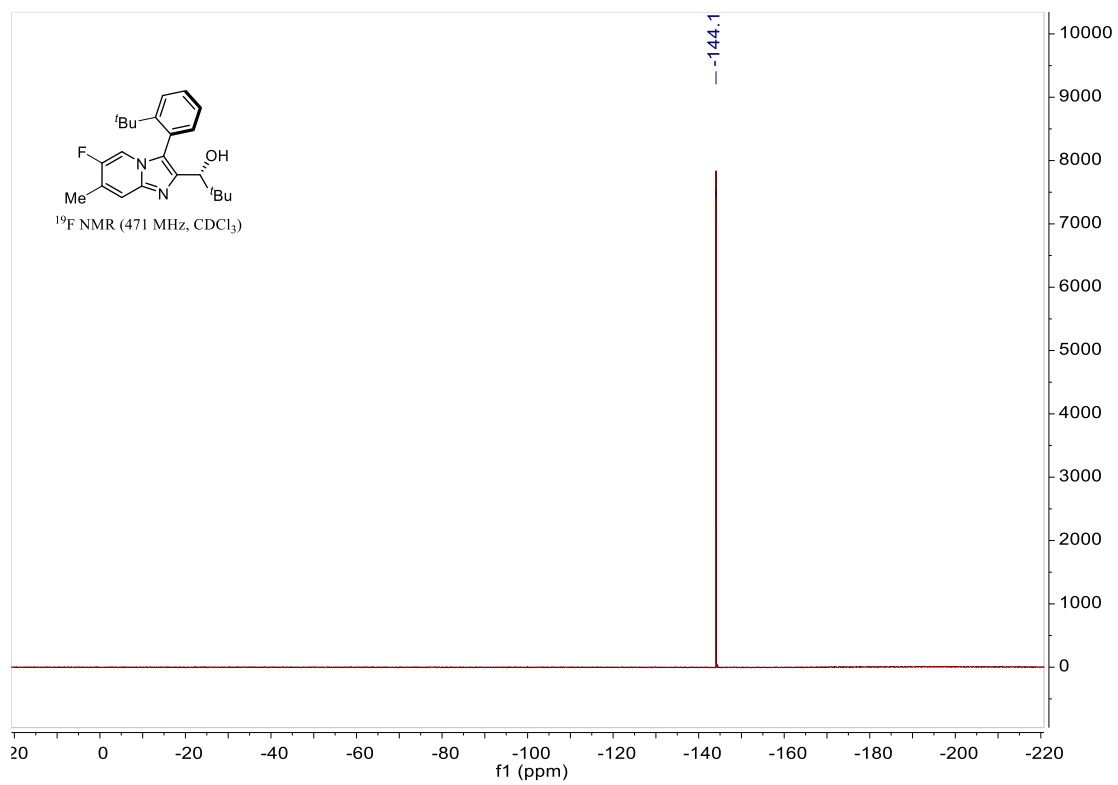



Compound **3m**

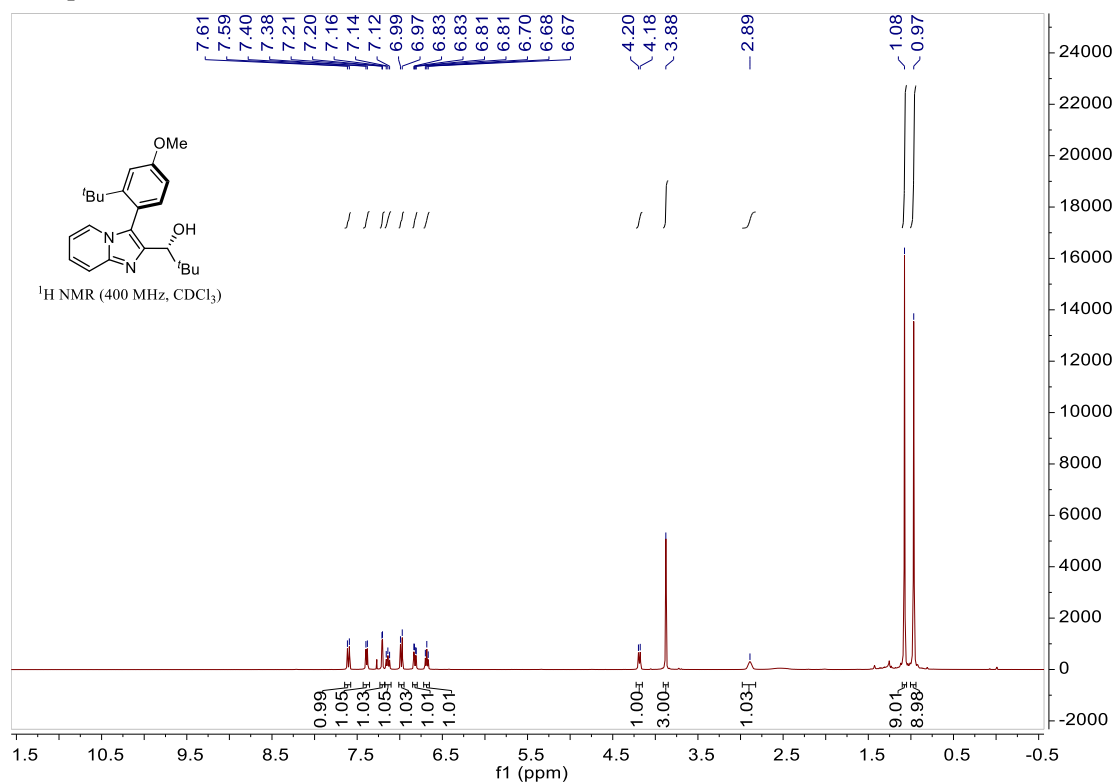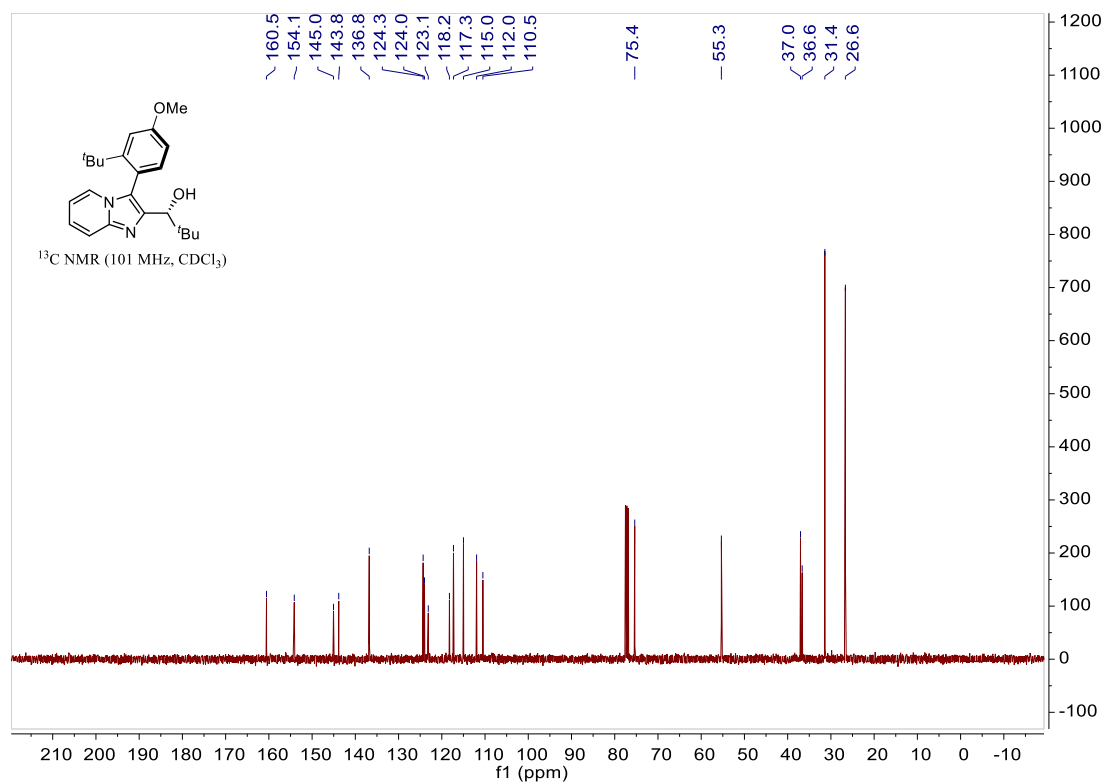

Compound **3m'**

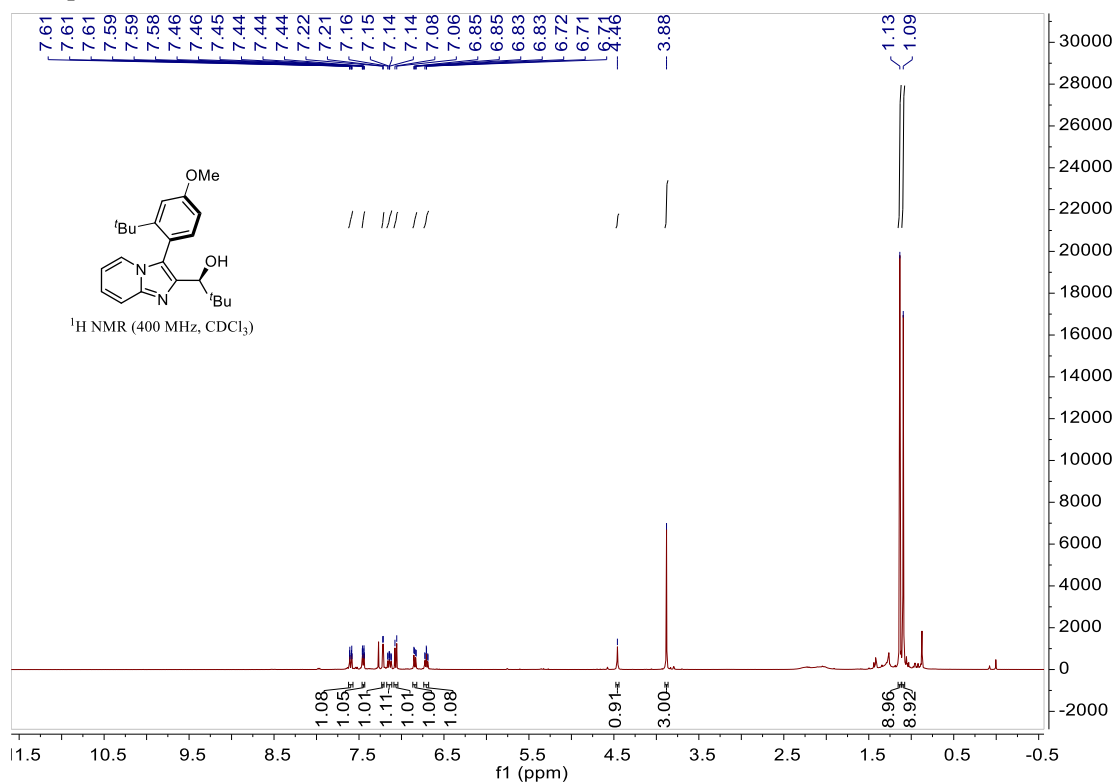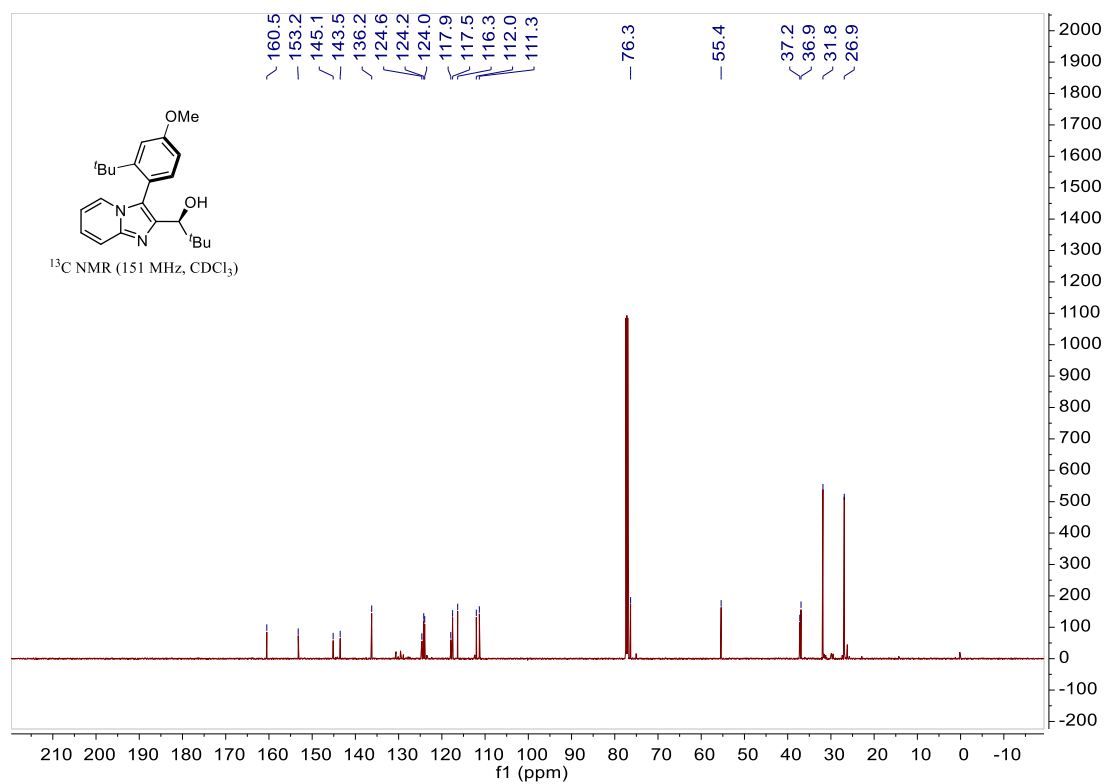

Compound **3n**

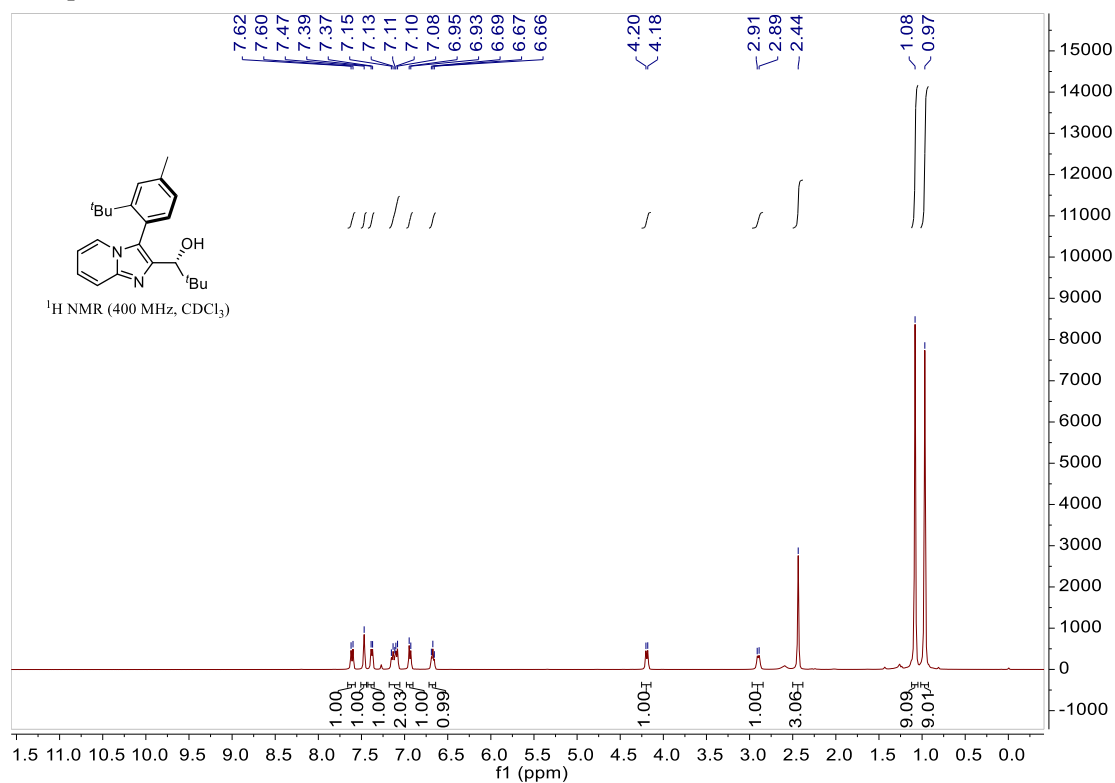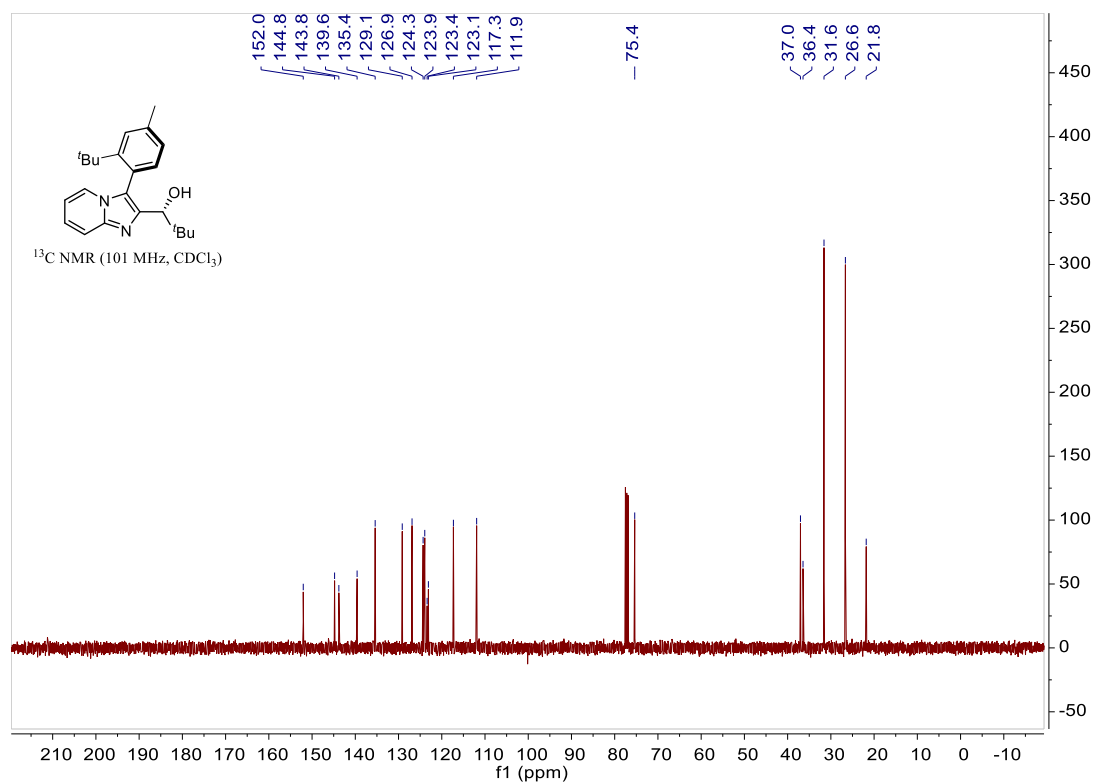

Compound **3n'**

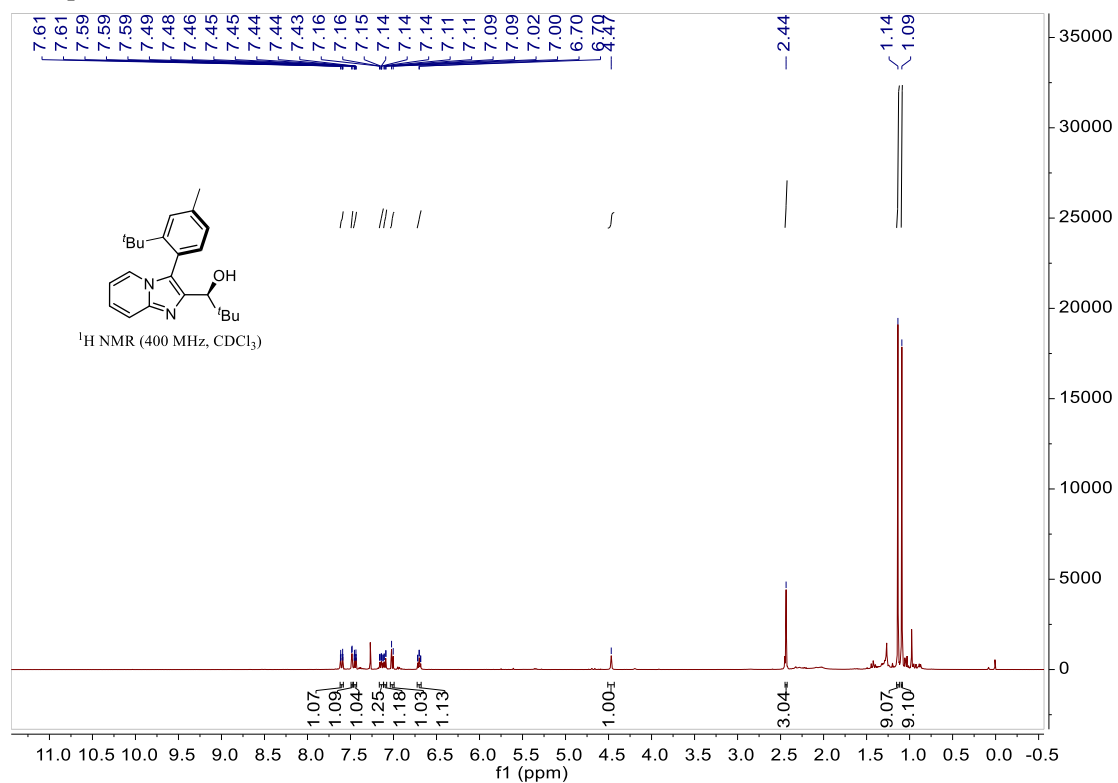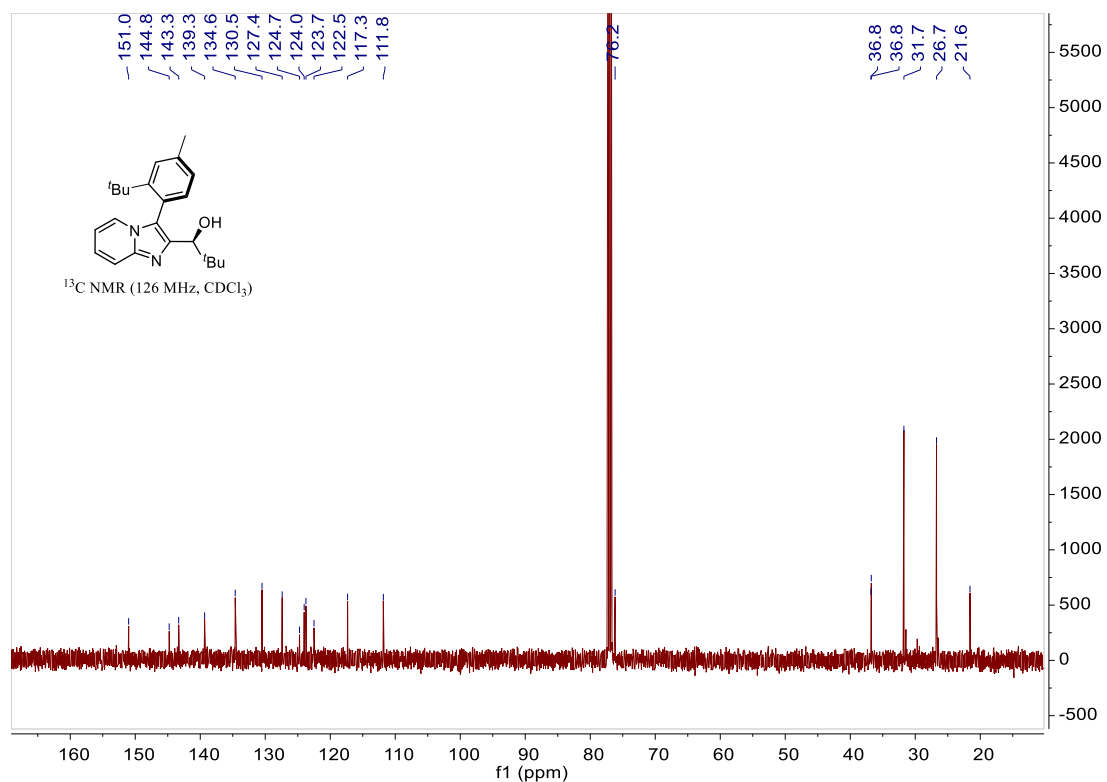

Compound **30**

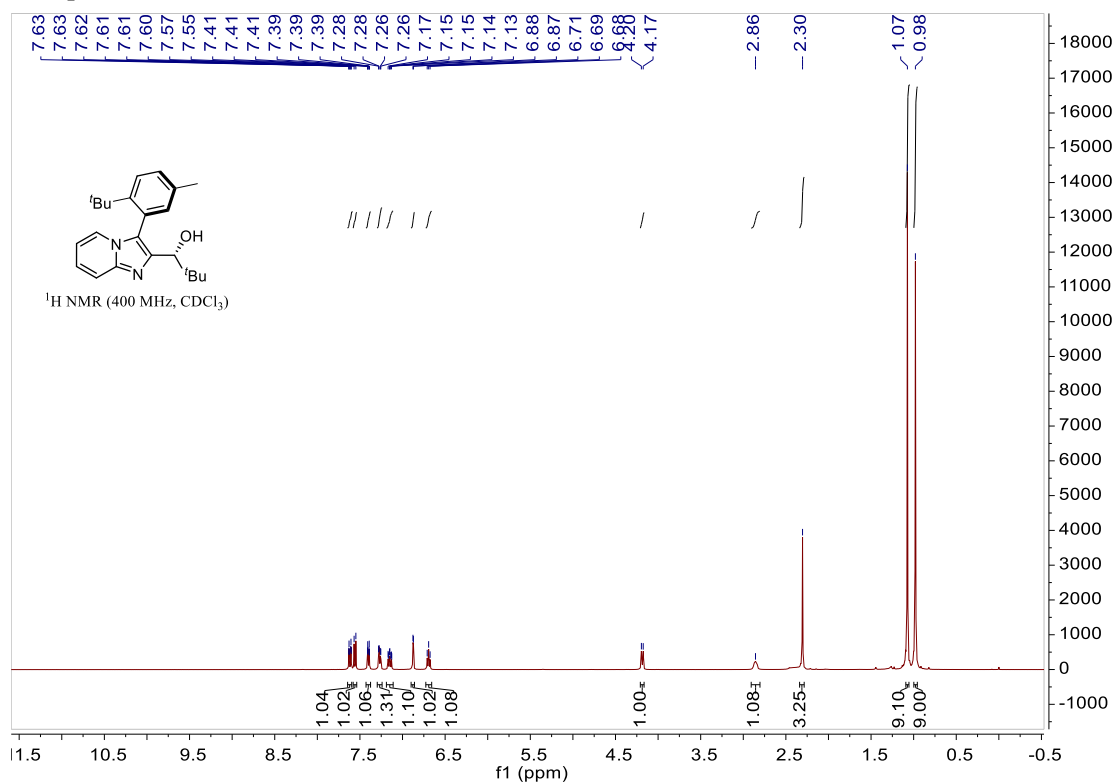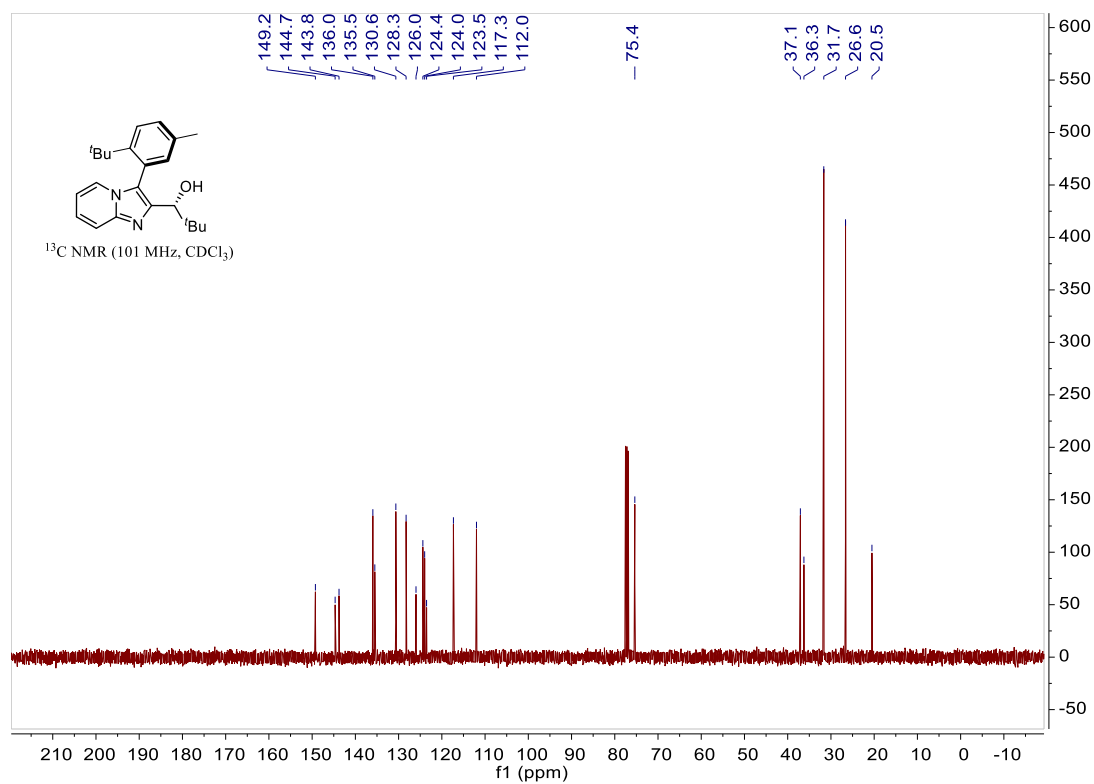

Compound 3p

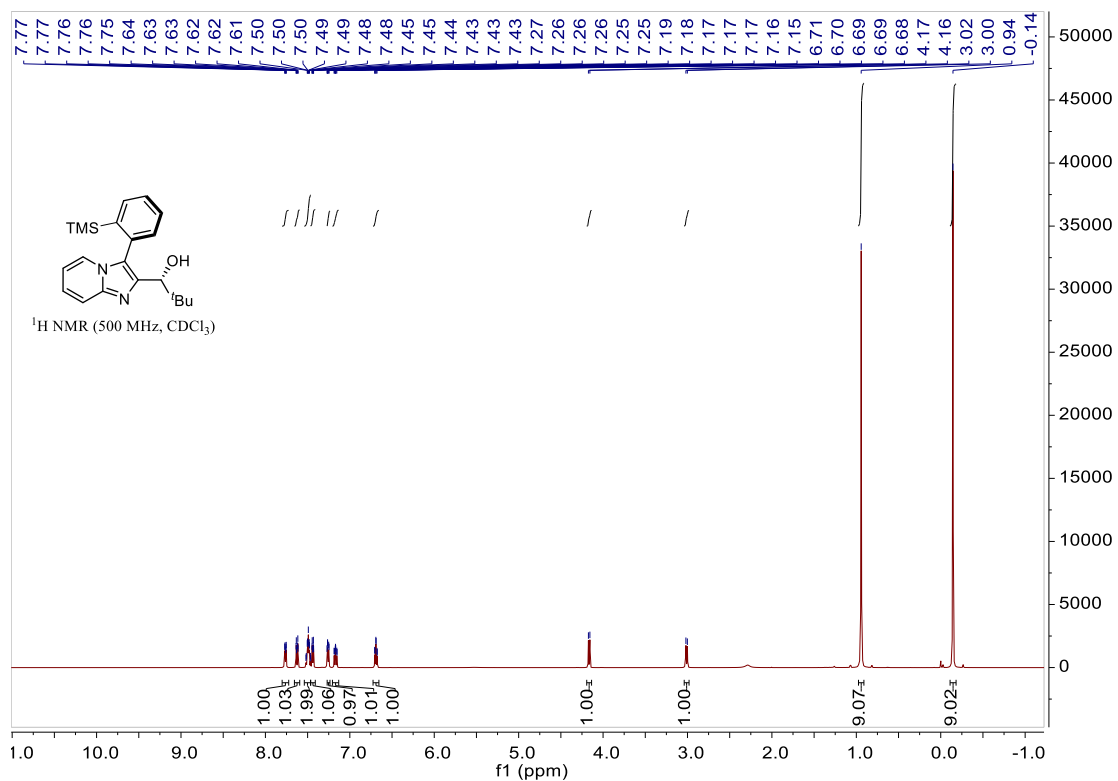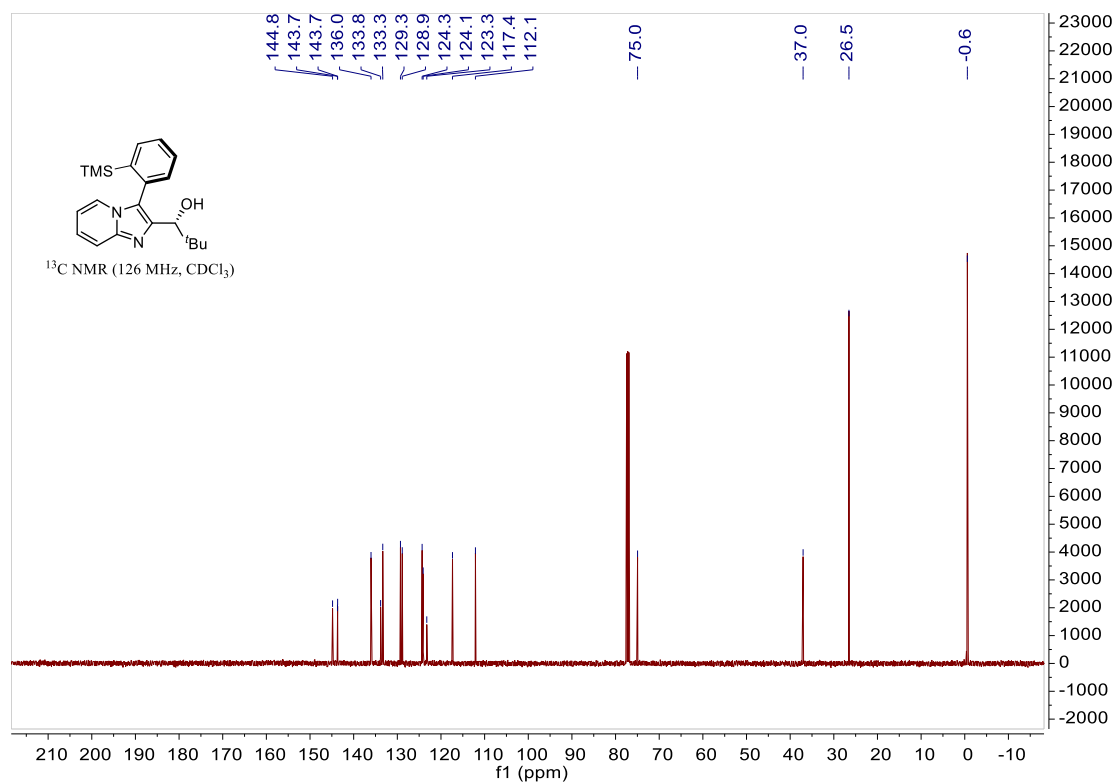

Compound 3q

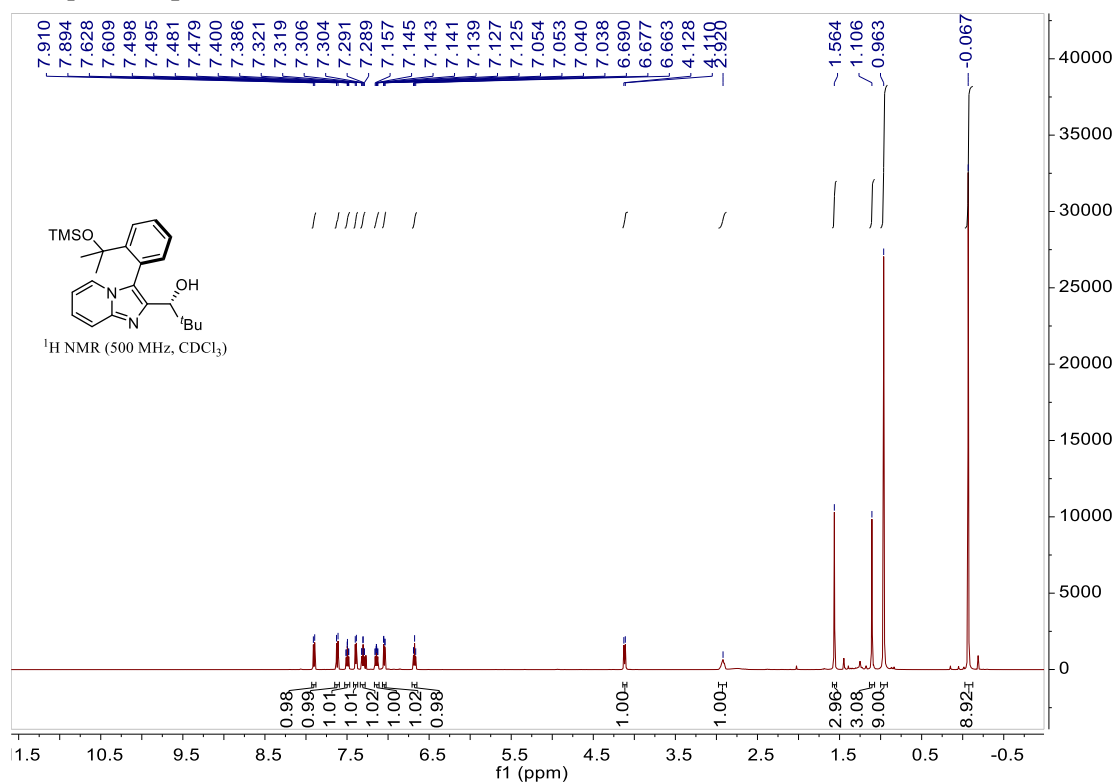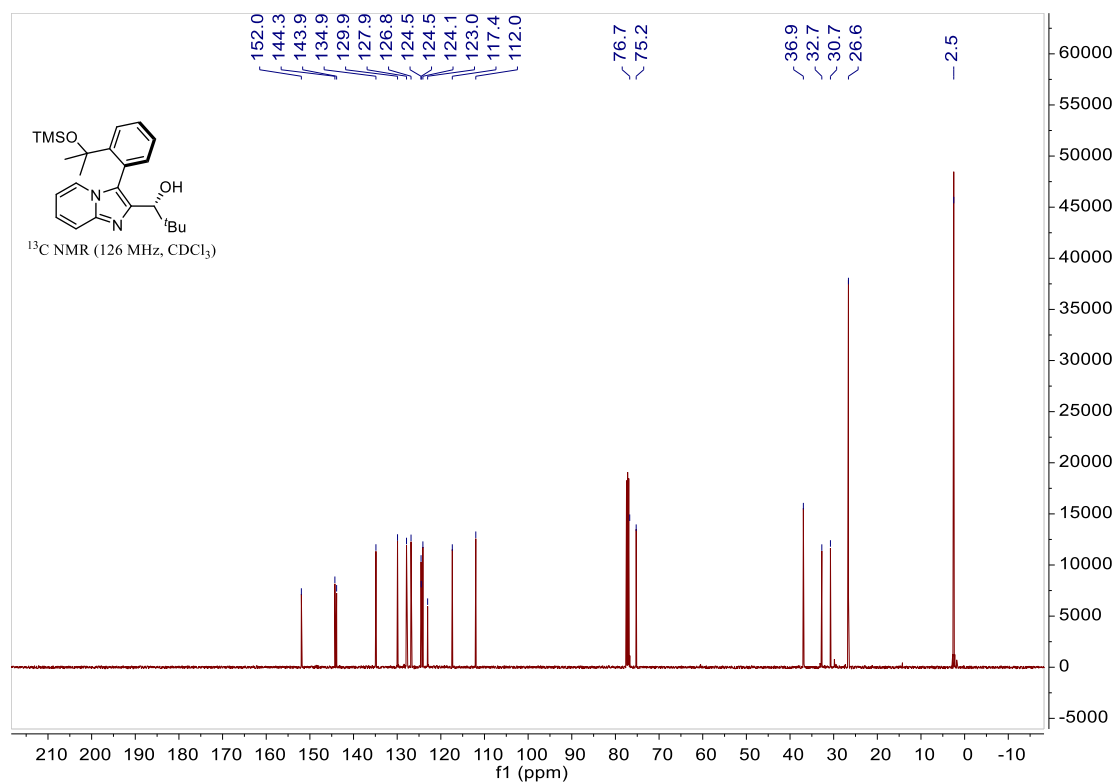

### Compound 3r

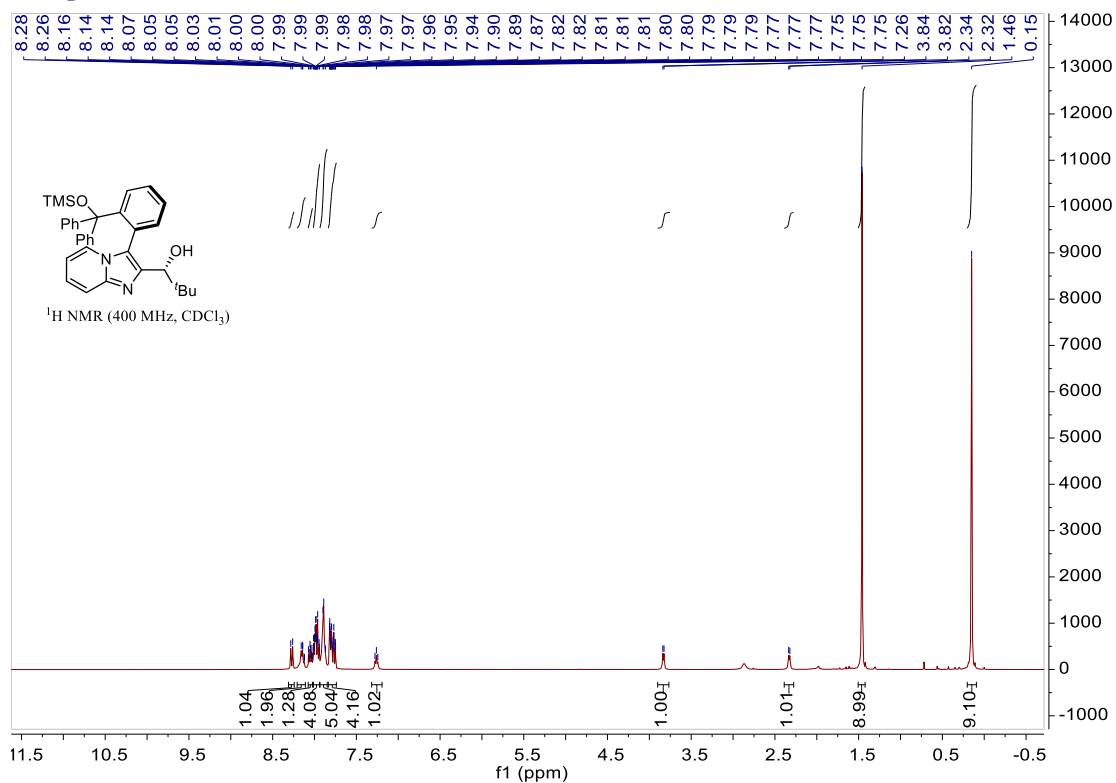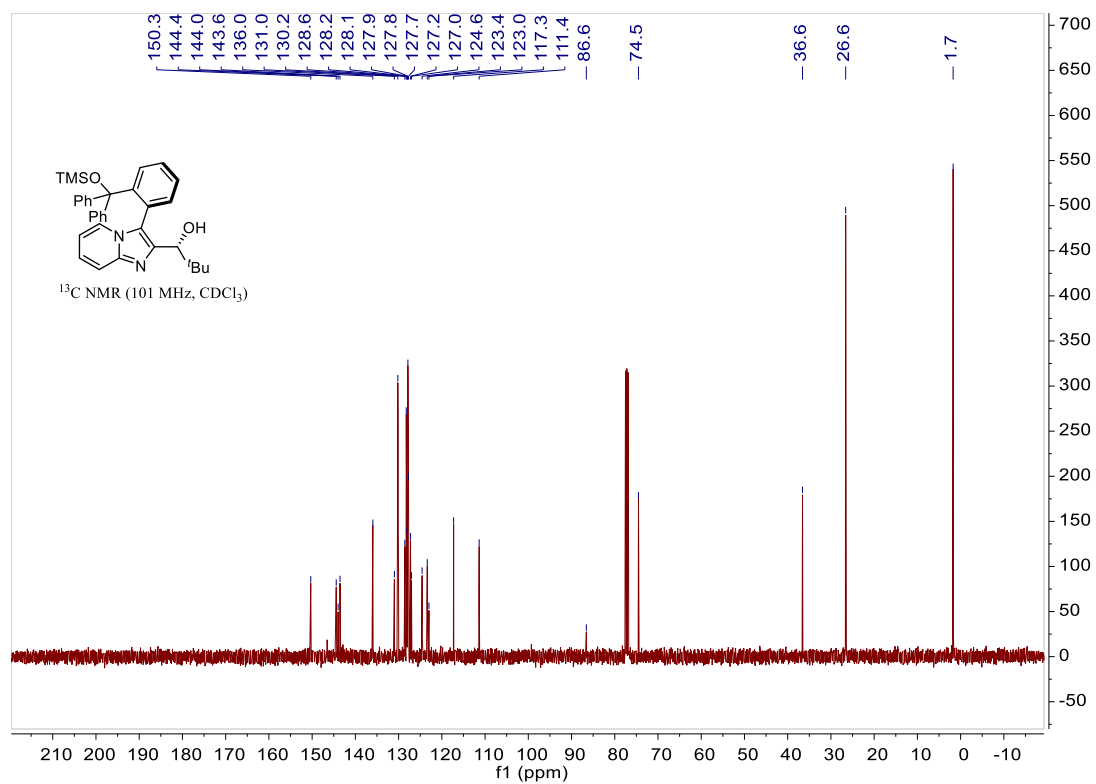



### Compound 3s

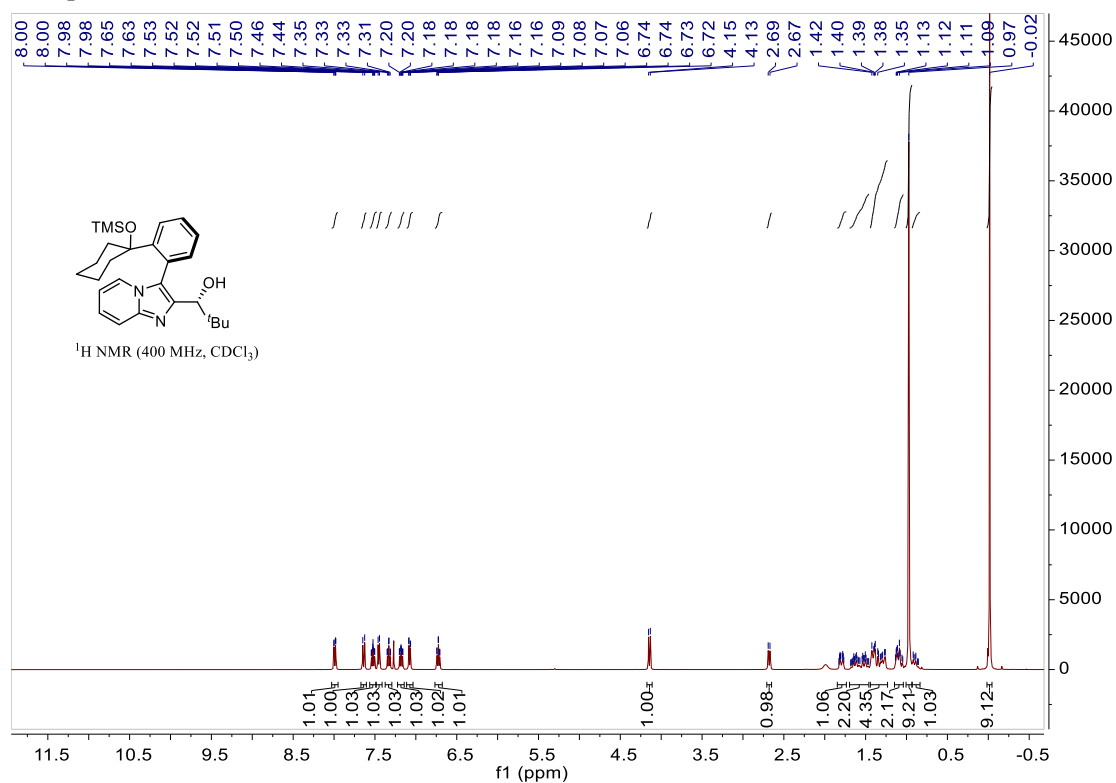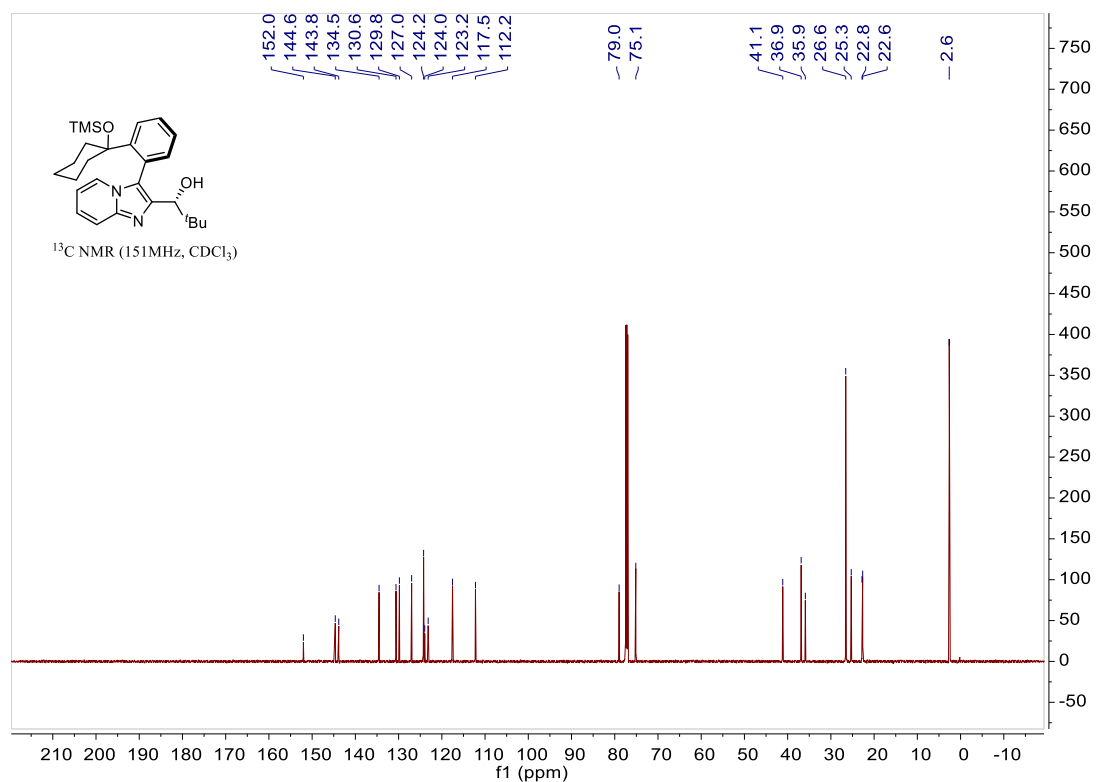

### Compound 3t

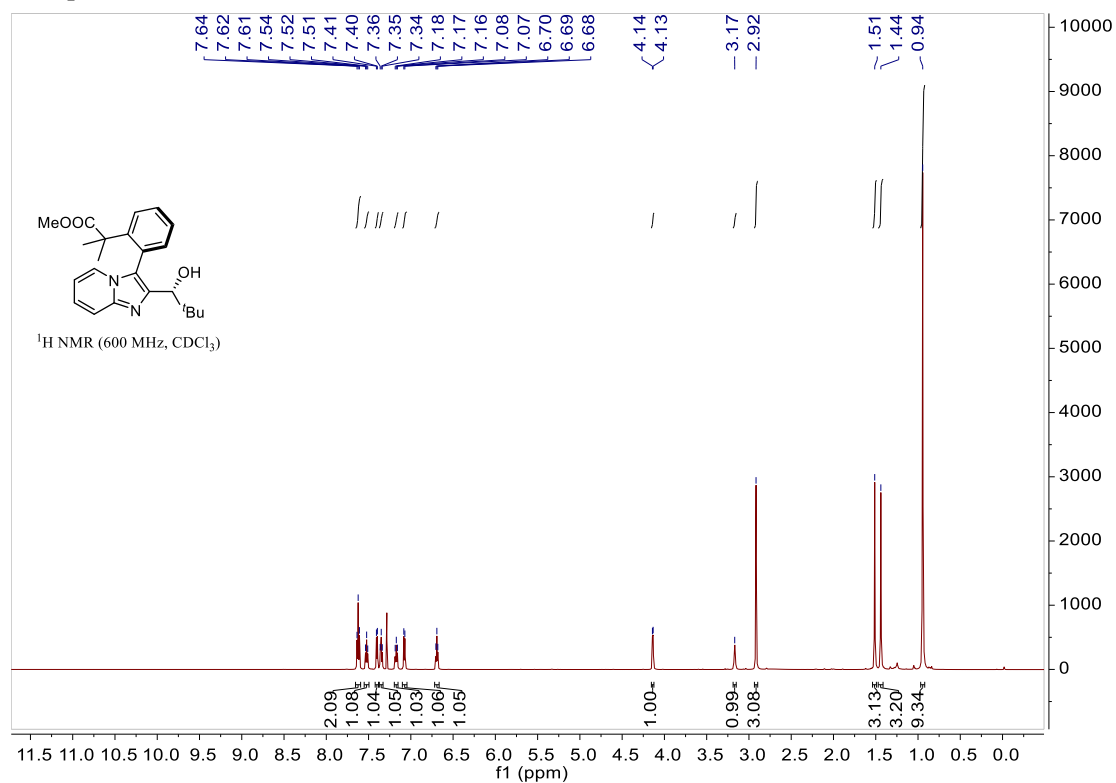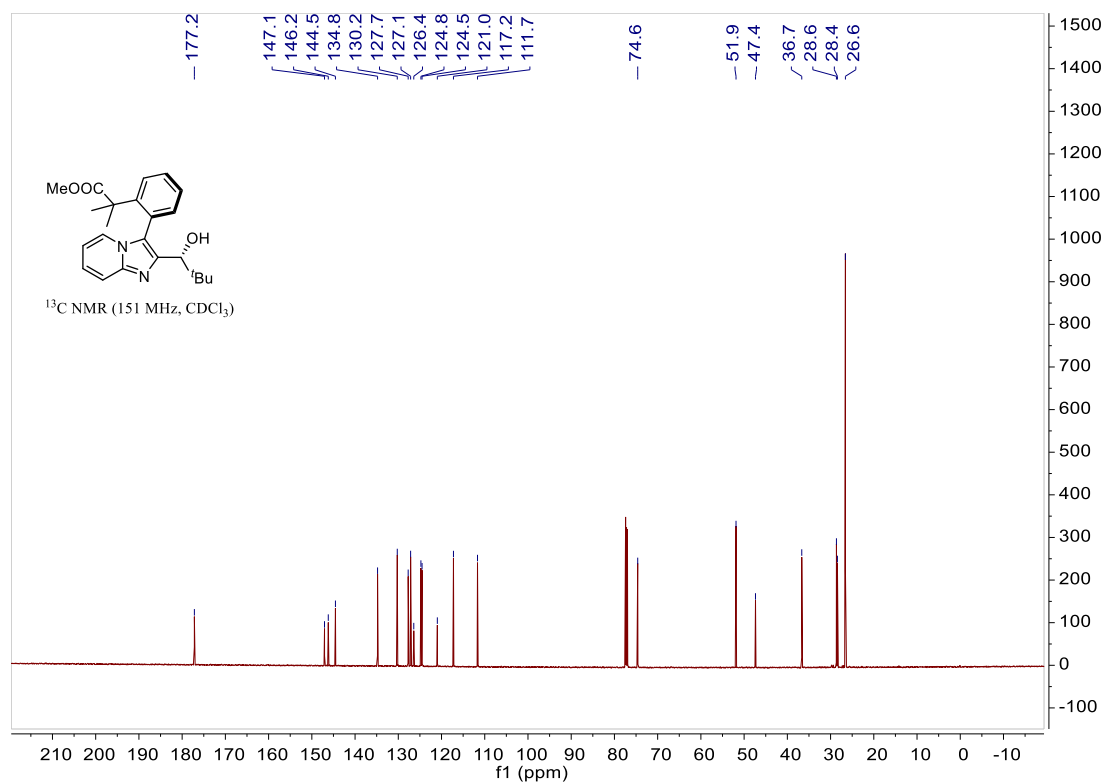

# Compound 3u

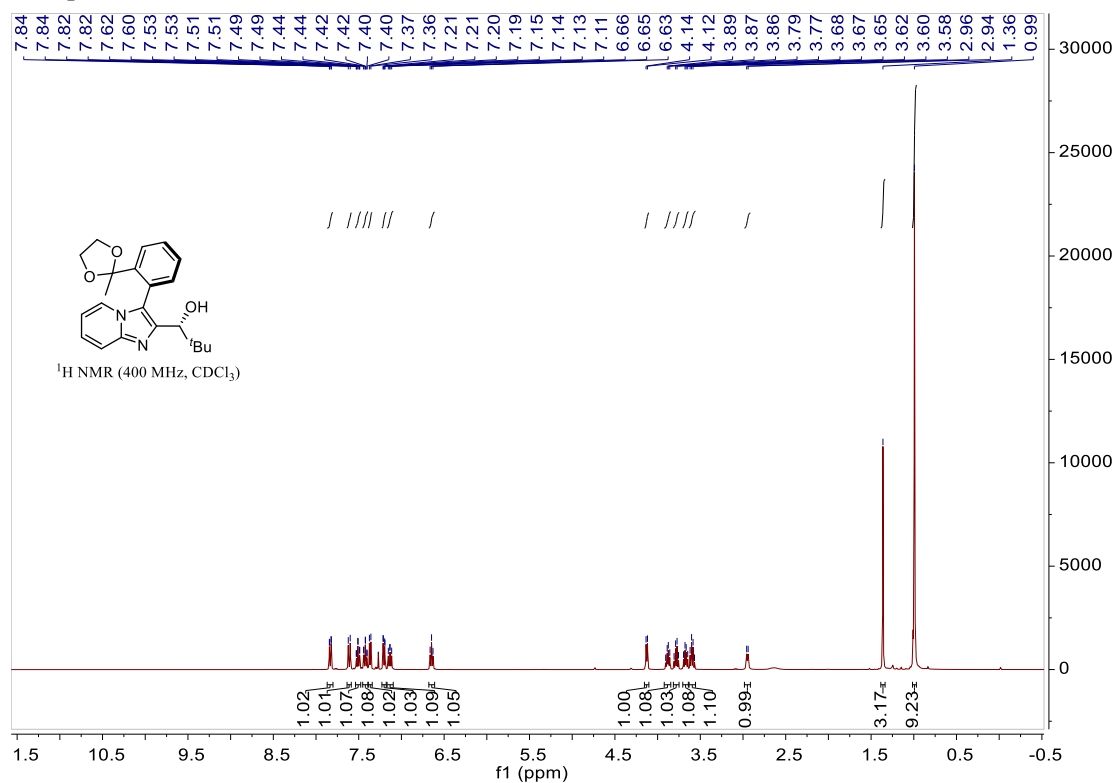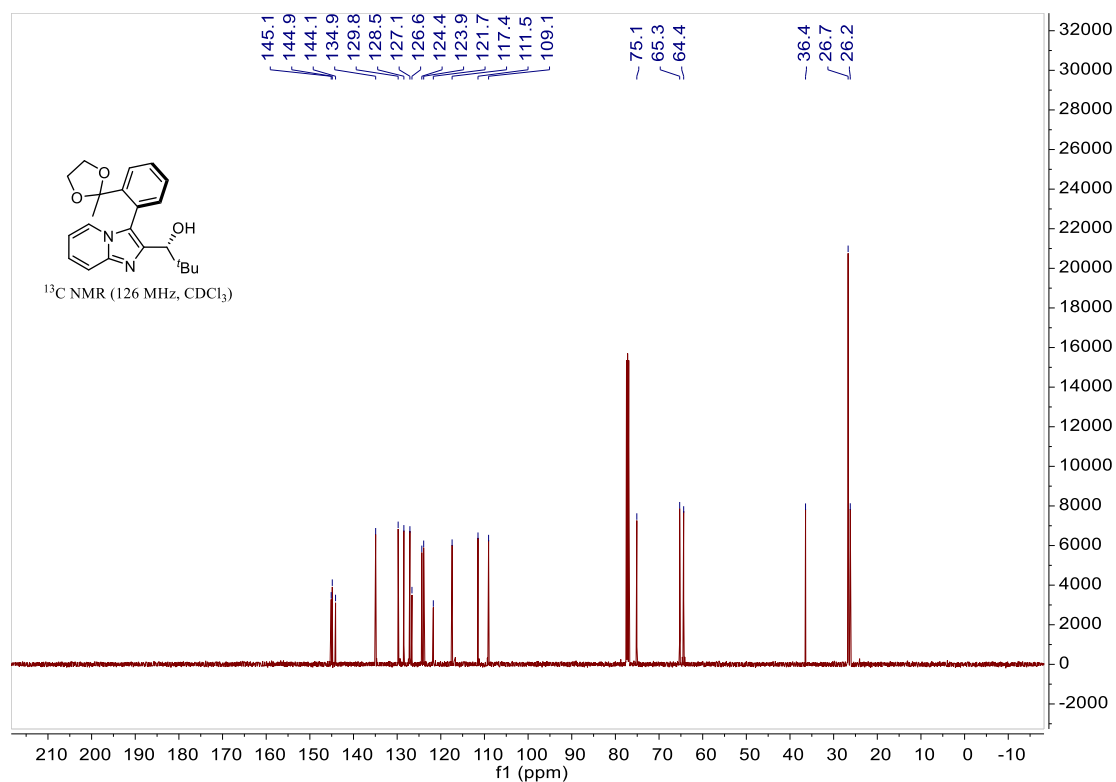

Compound **3v**

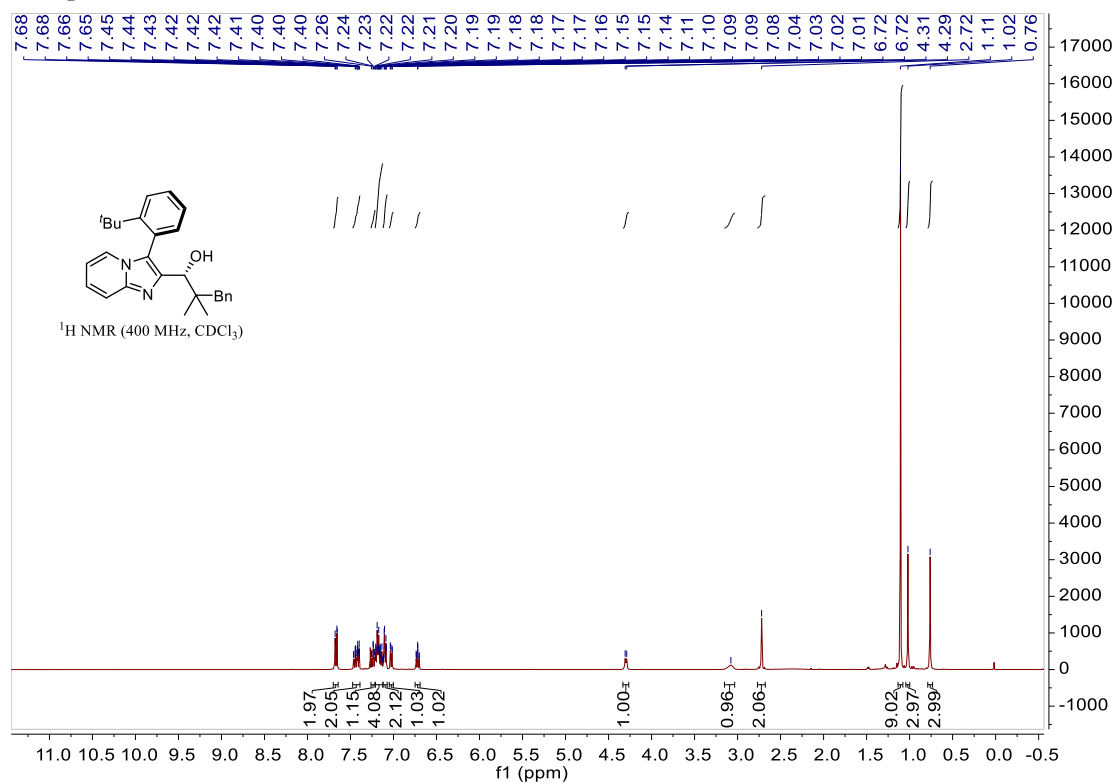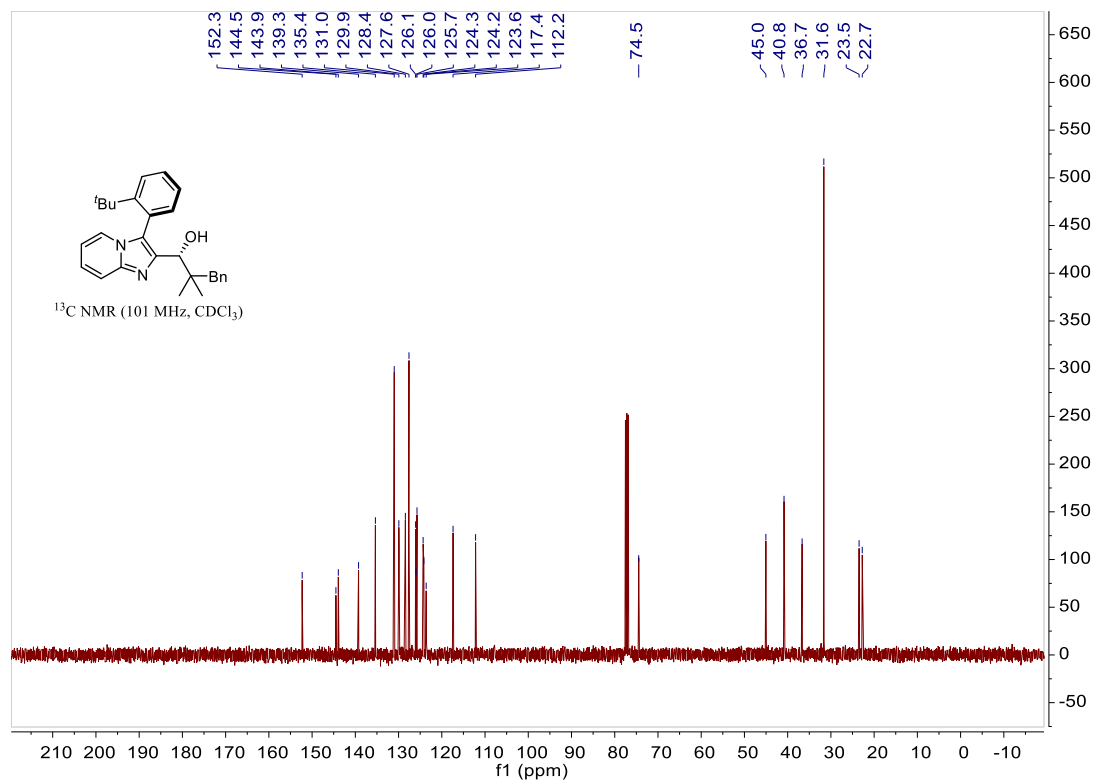

Compound 3w

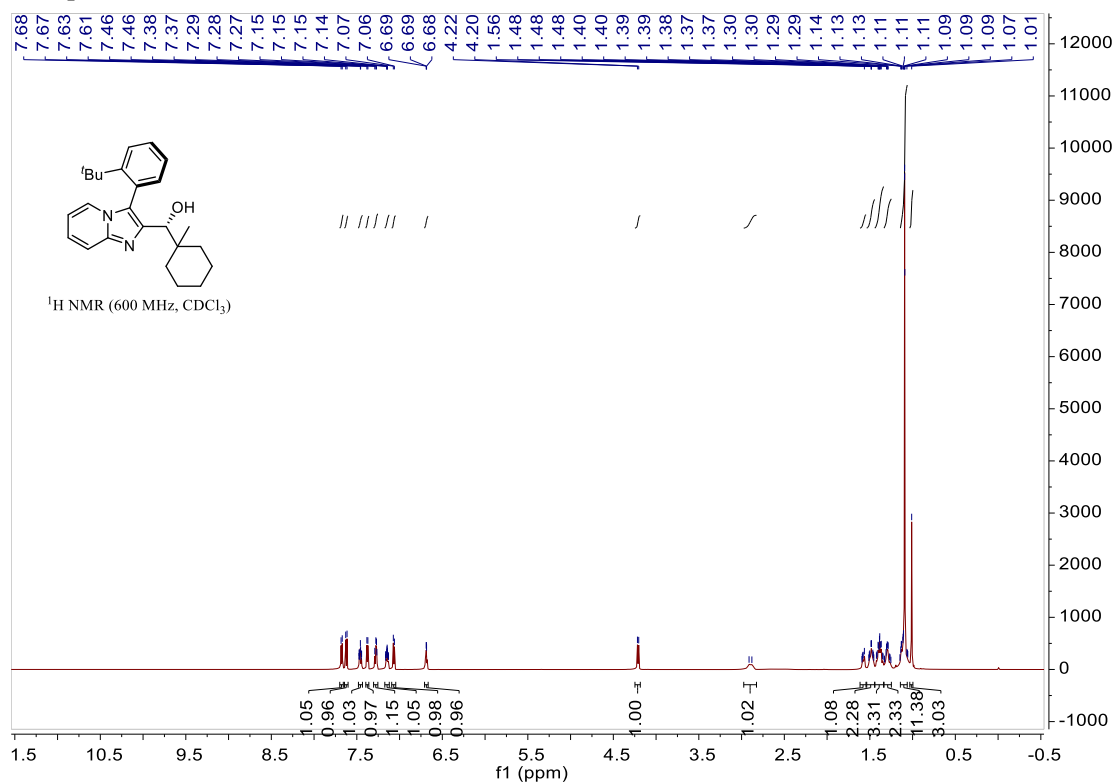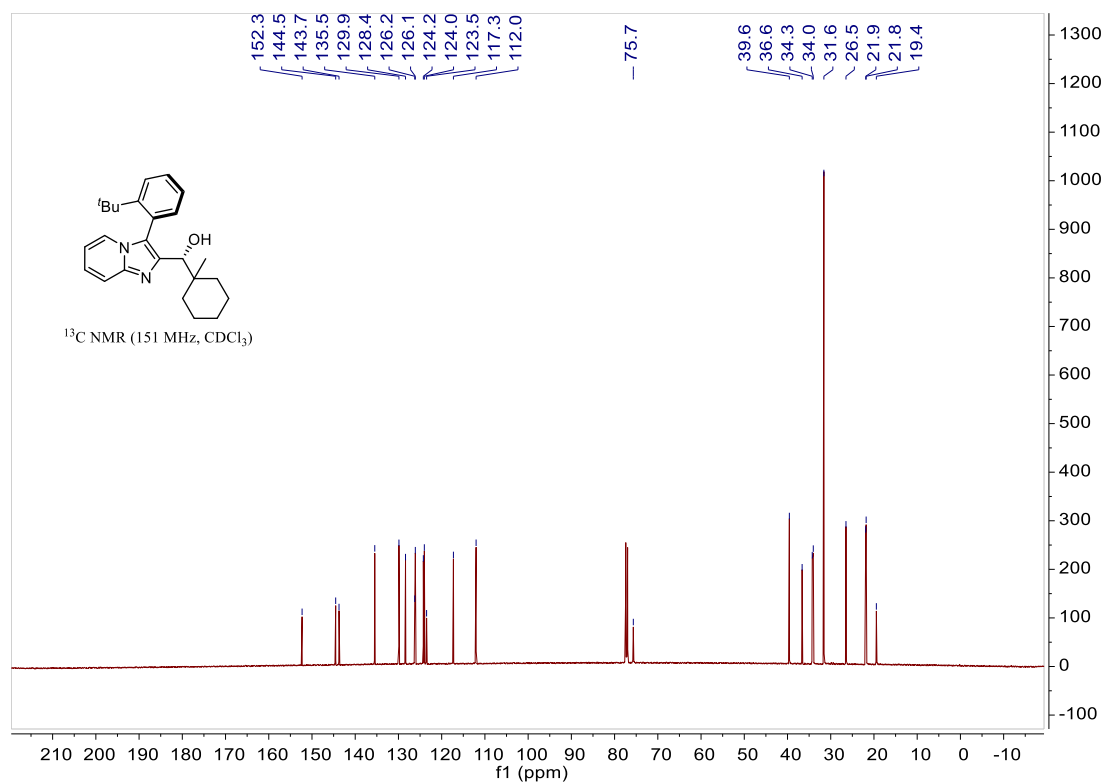

# Compound 2a

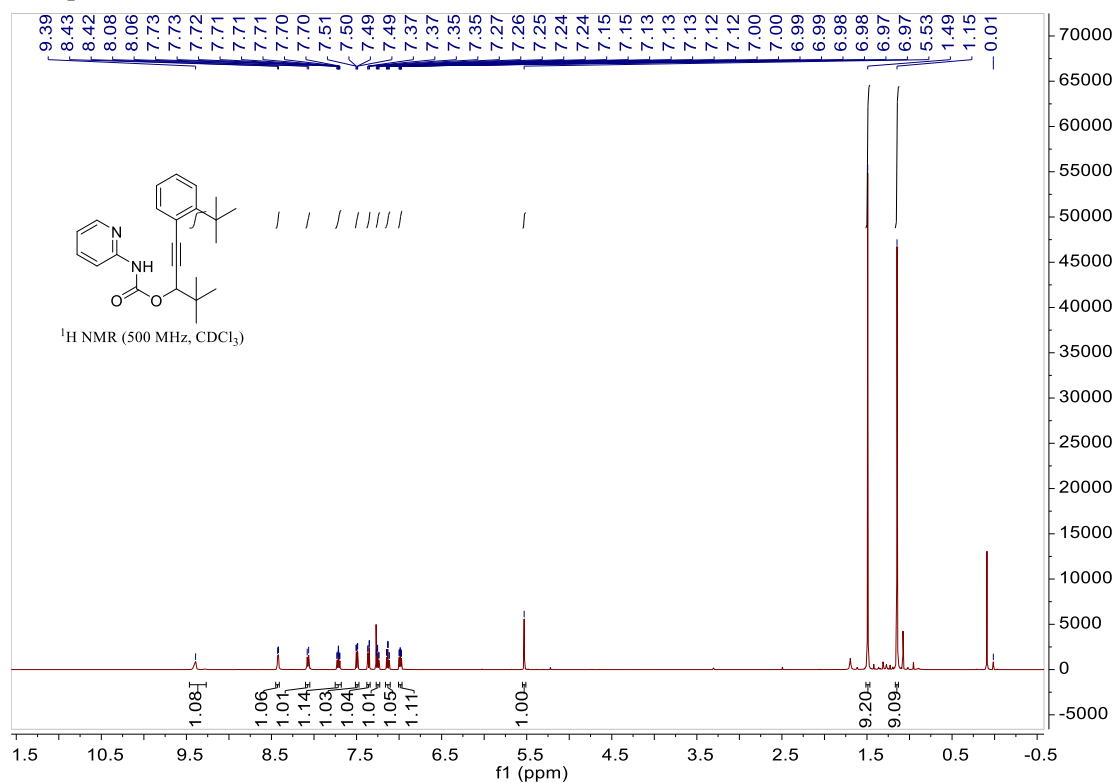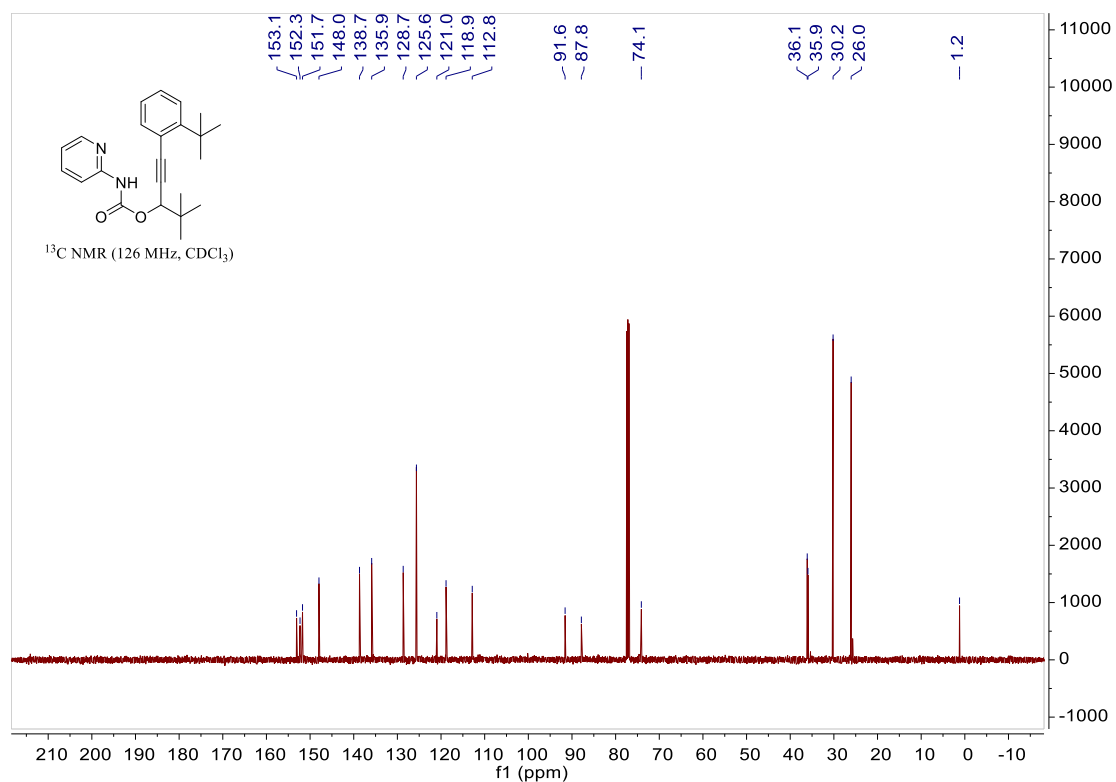

# Compound 2b

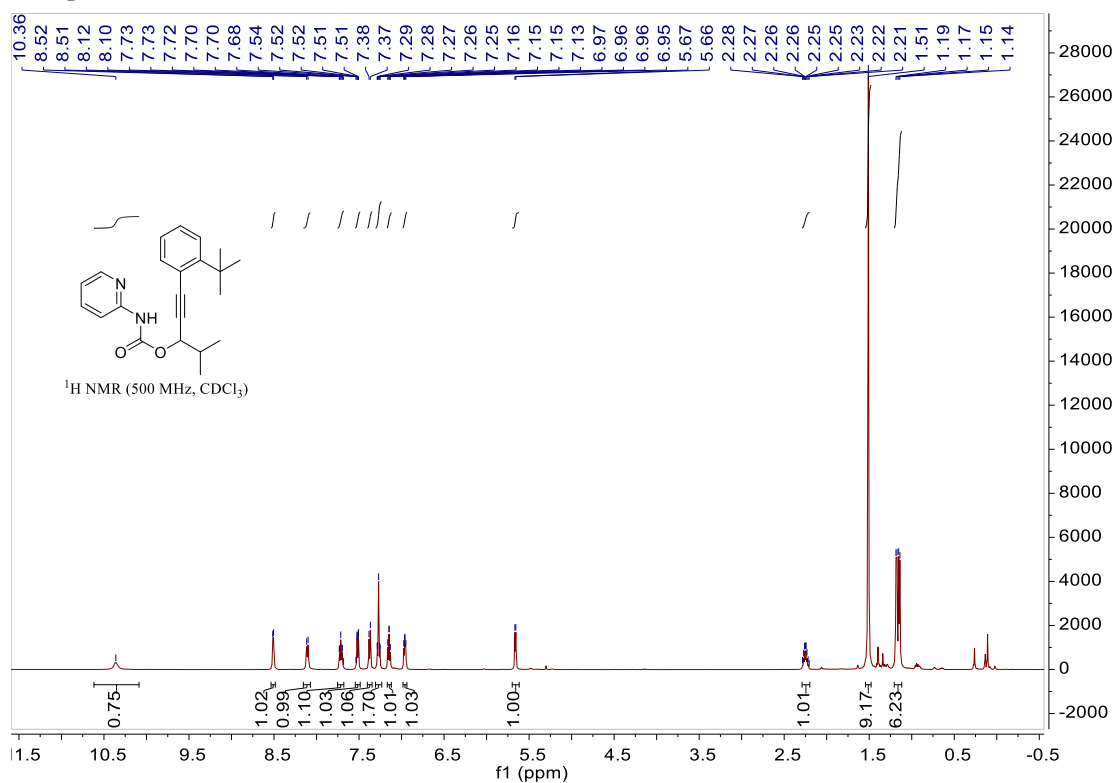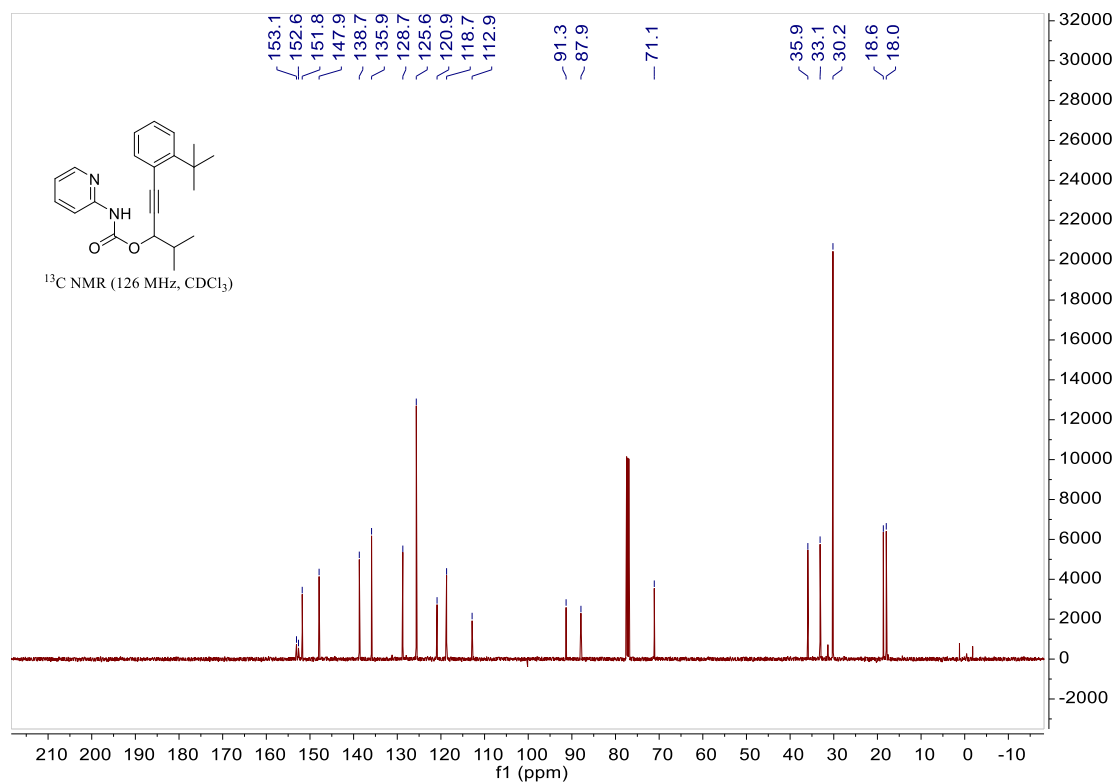

# Compound 2c

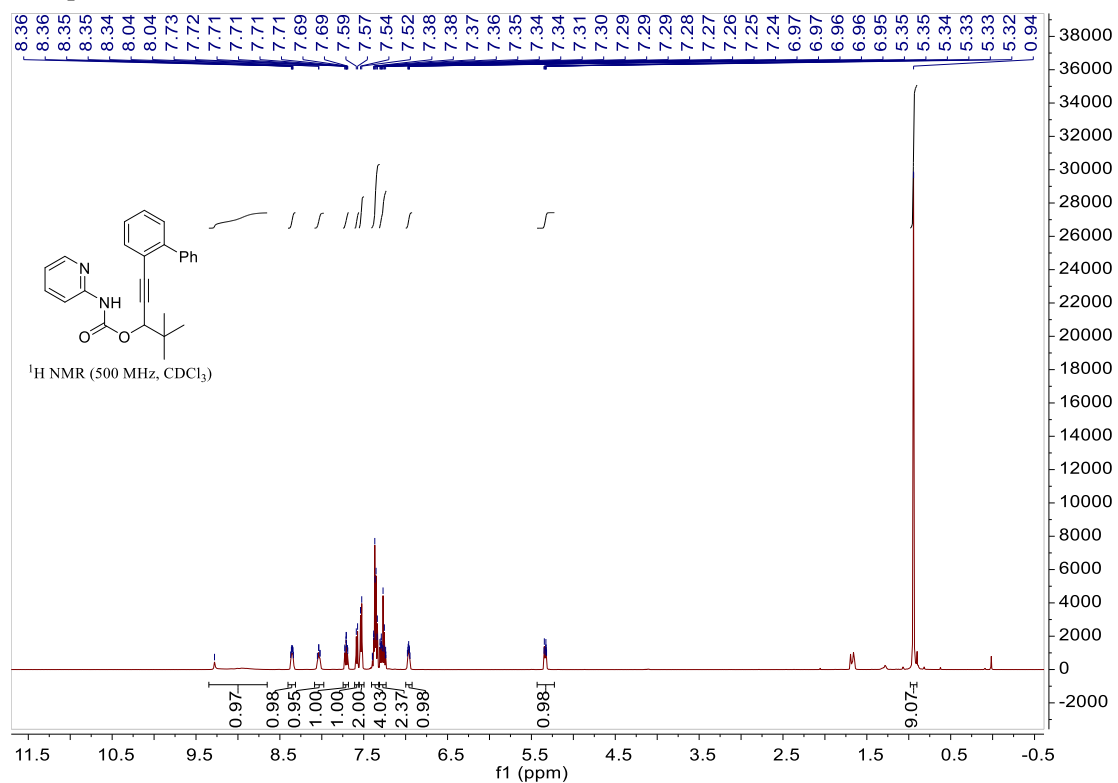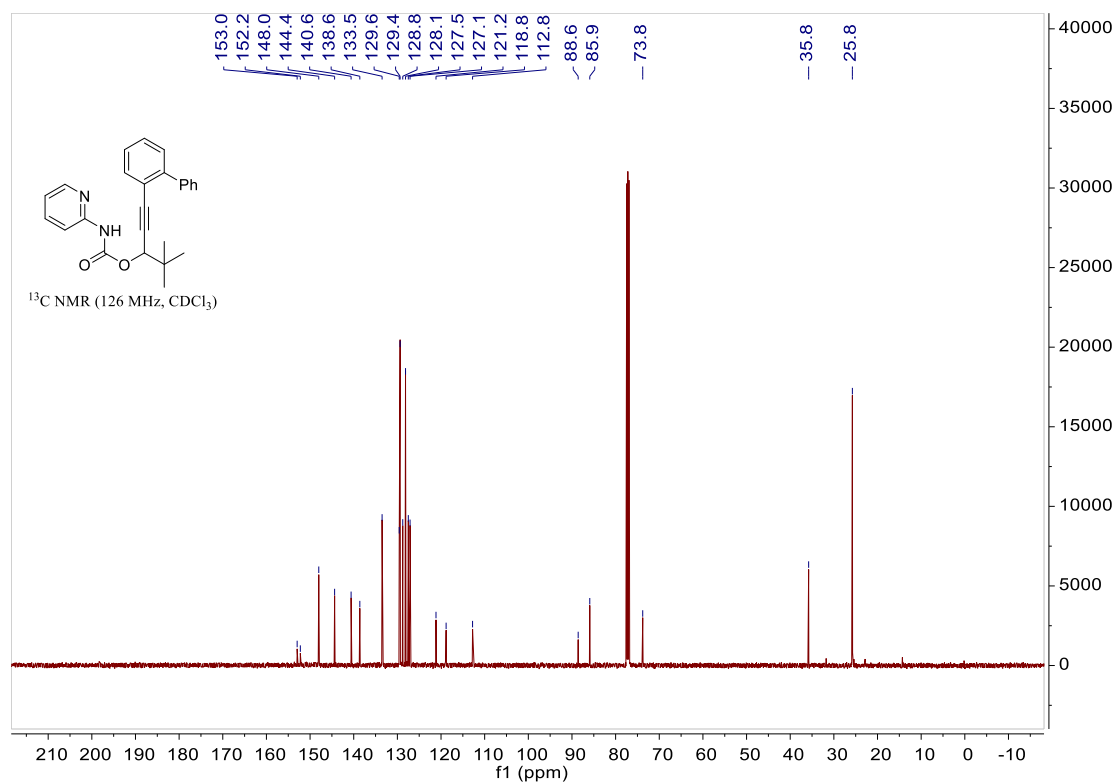



# Compound 2d

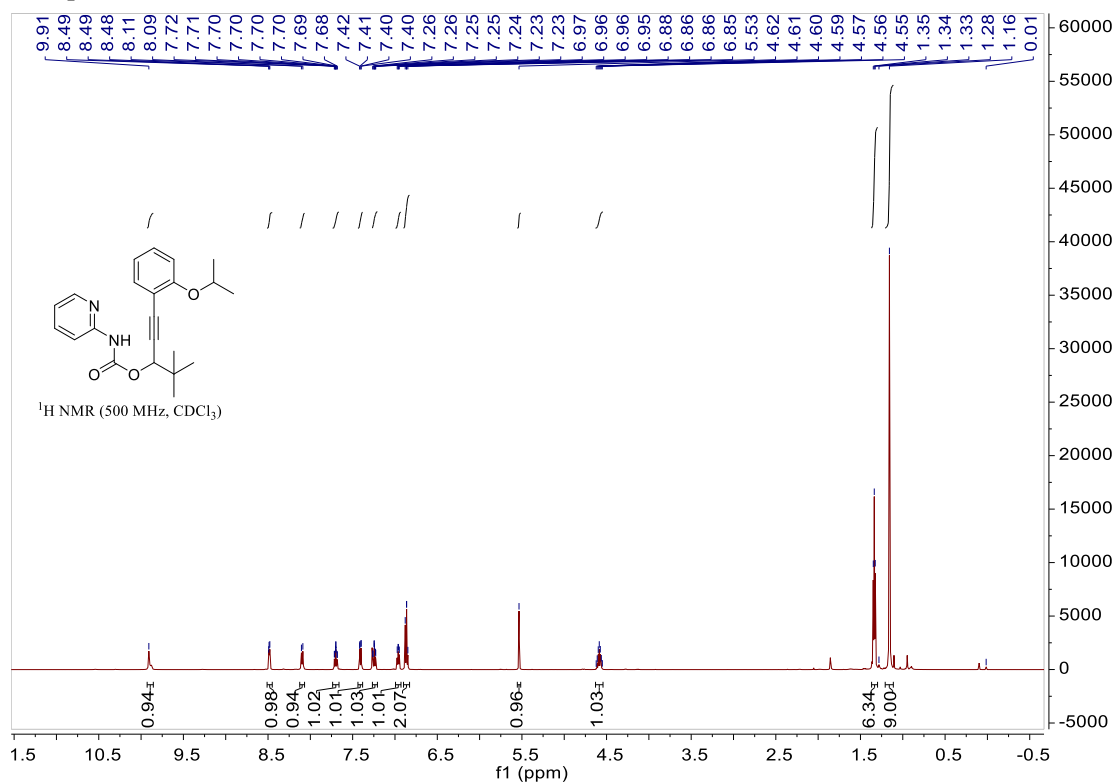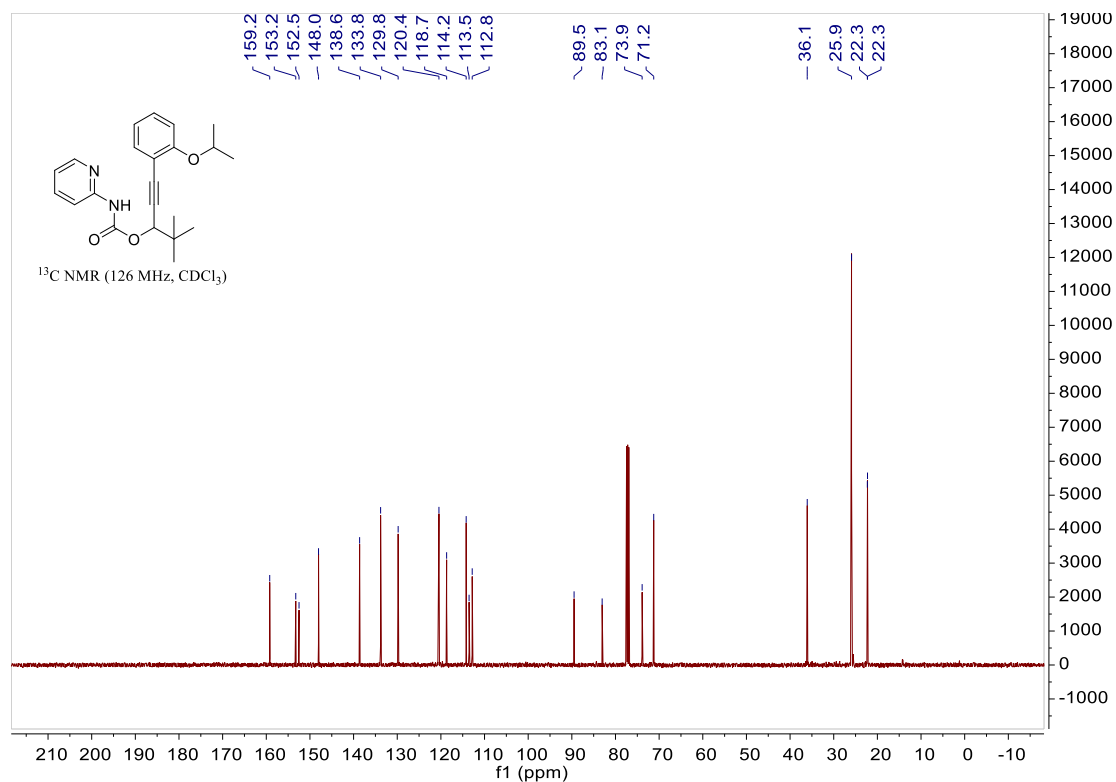

# Compound 2e

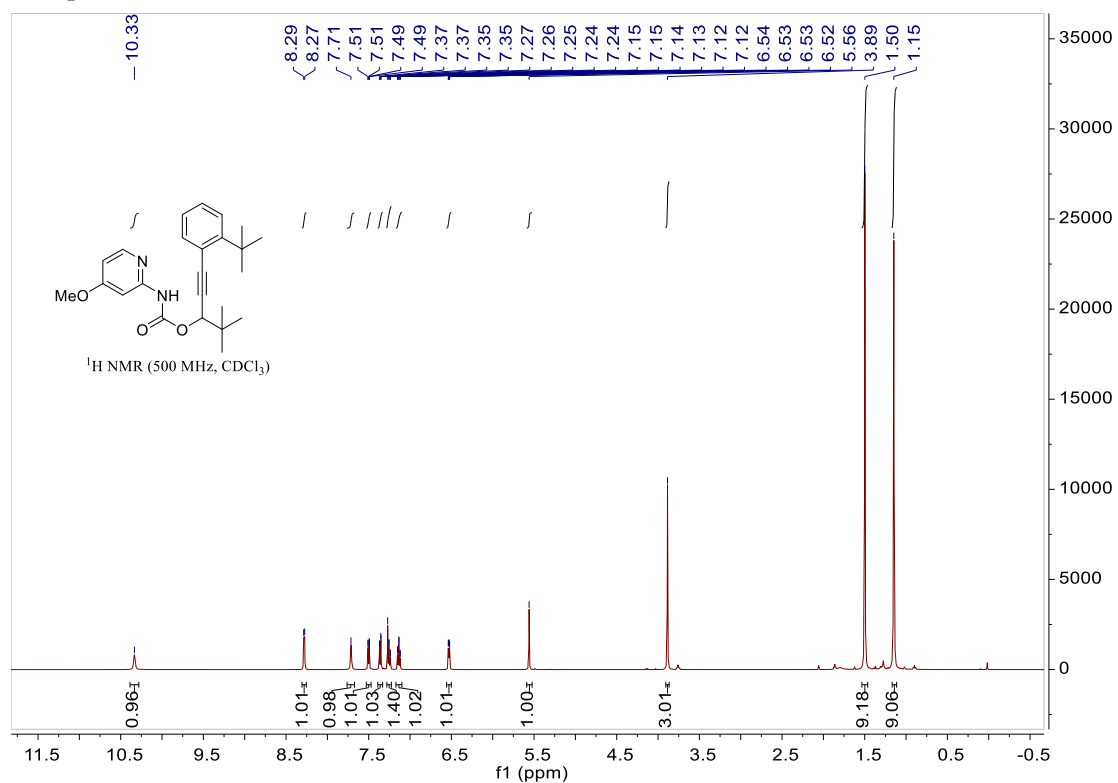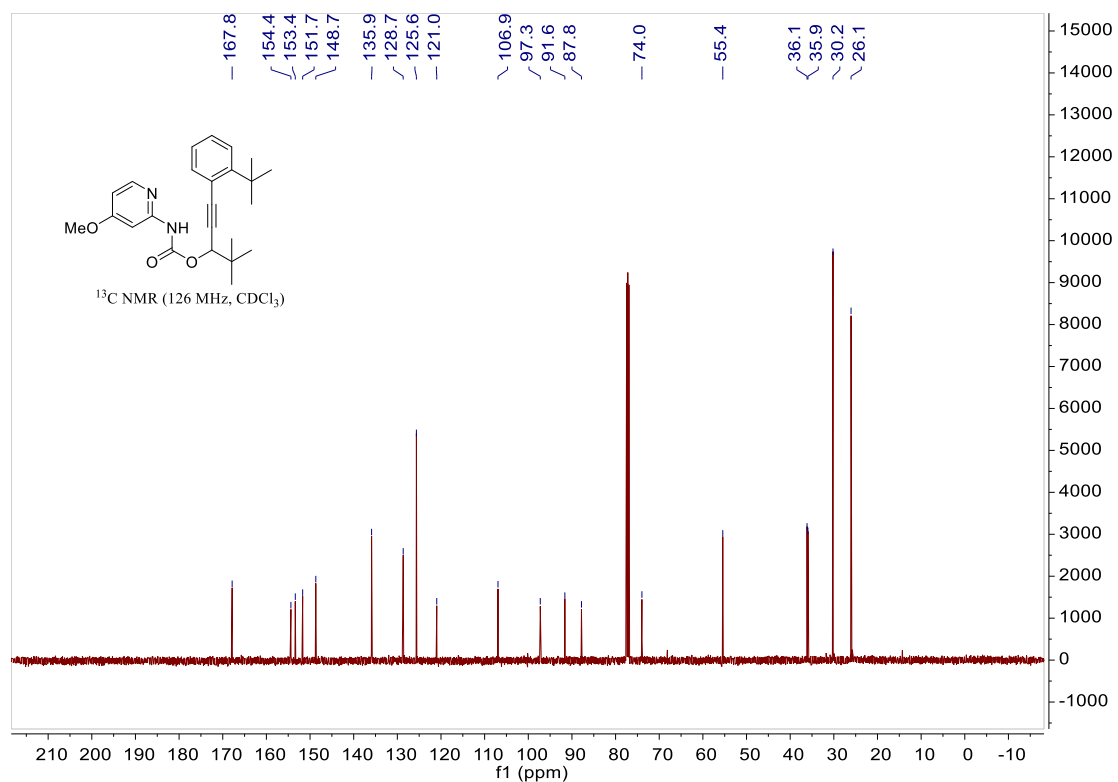

# Compound 2f

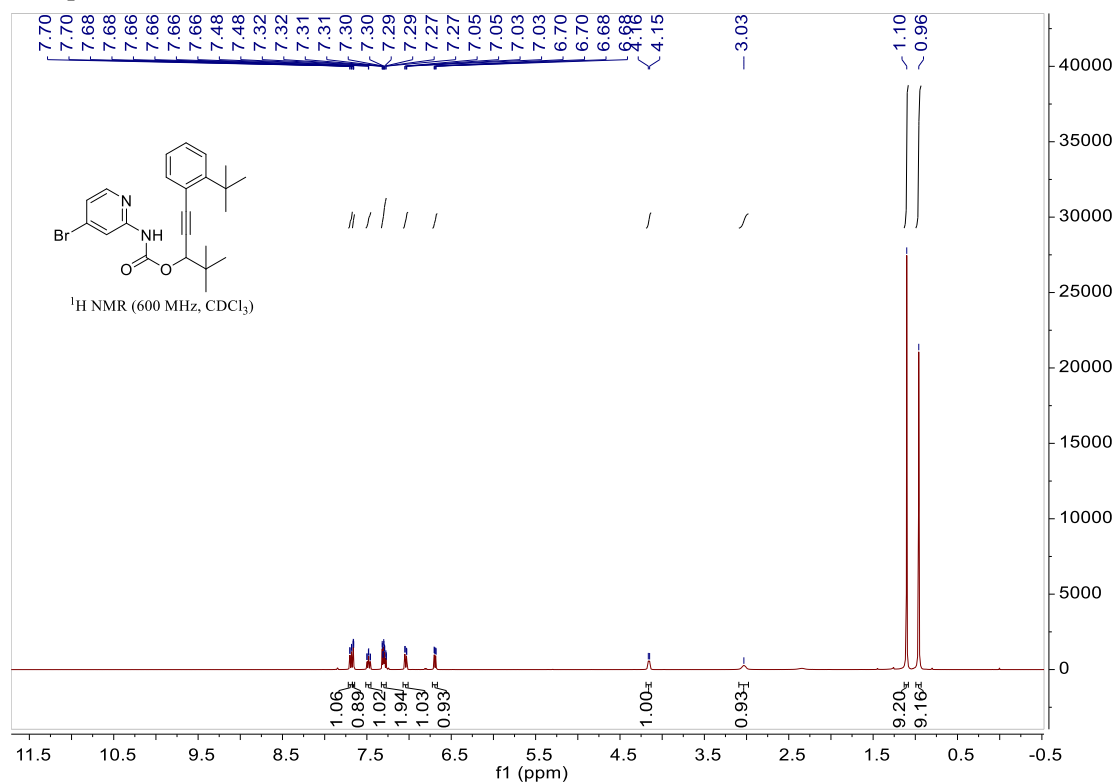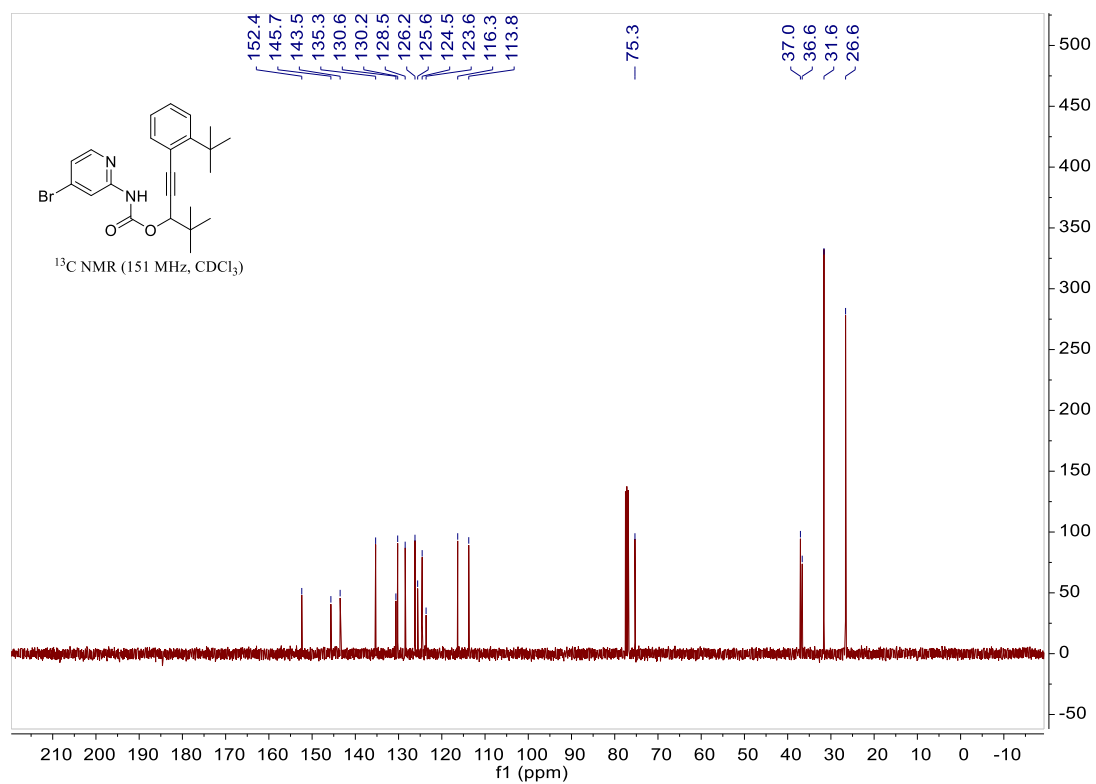

Compound 2g

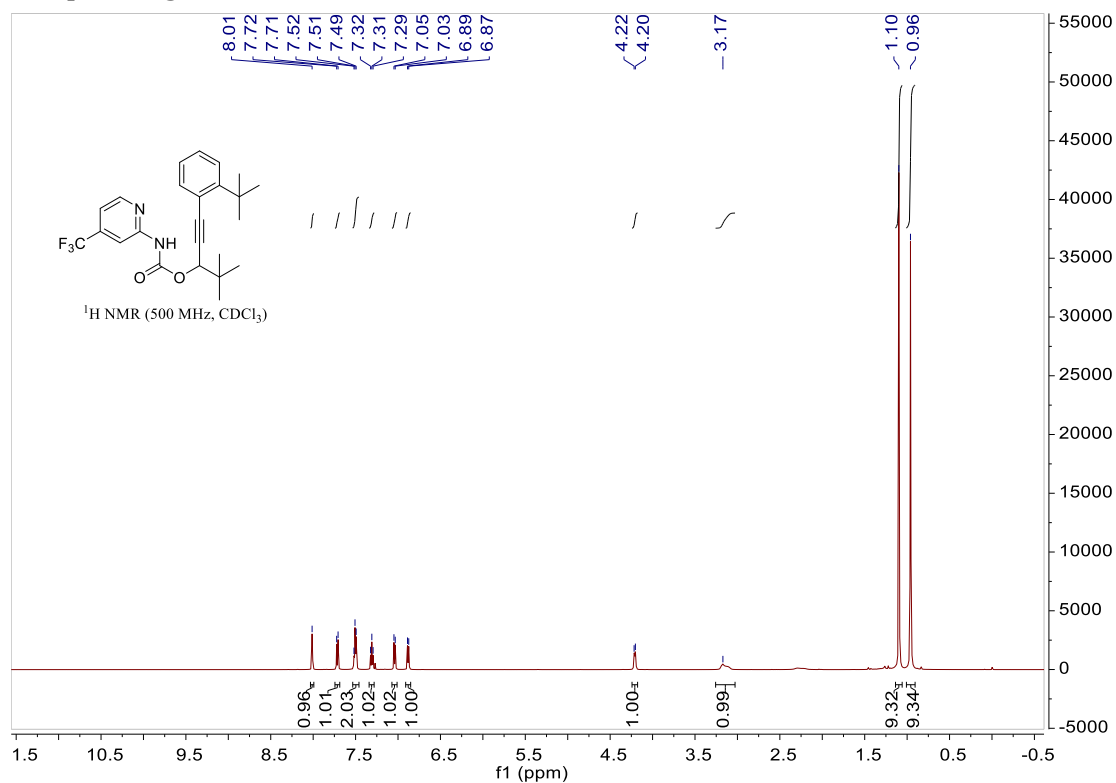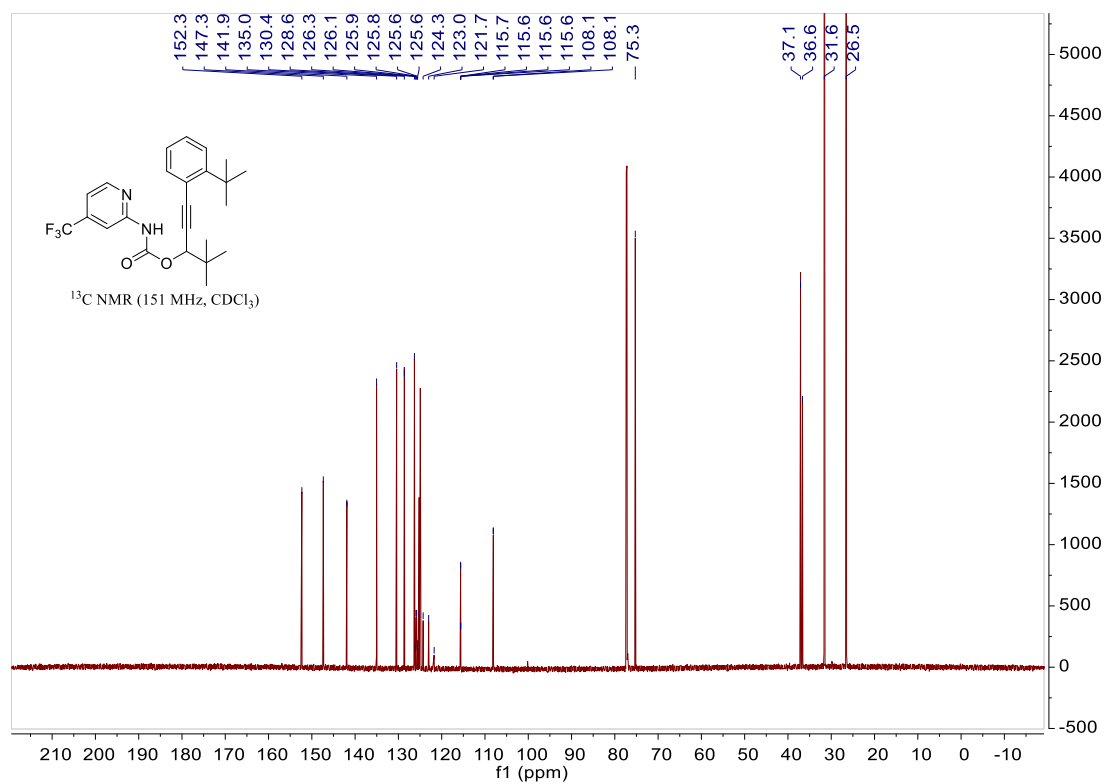

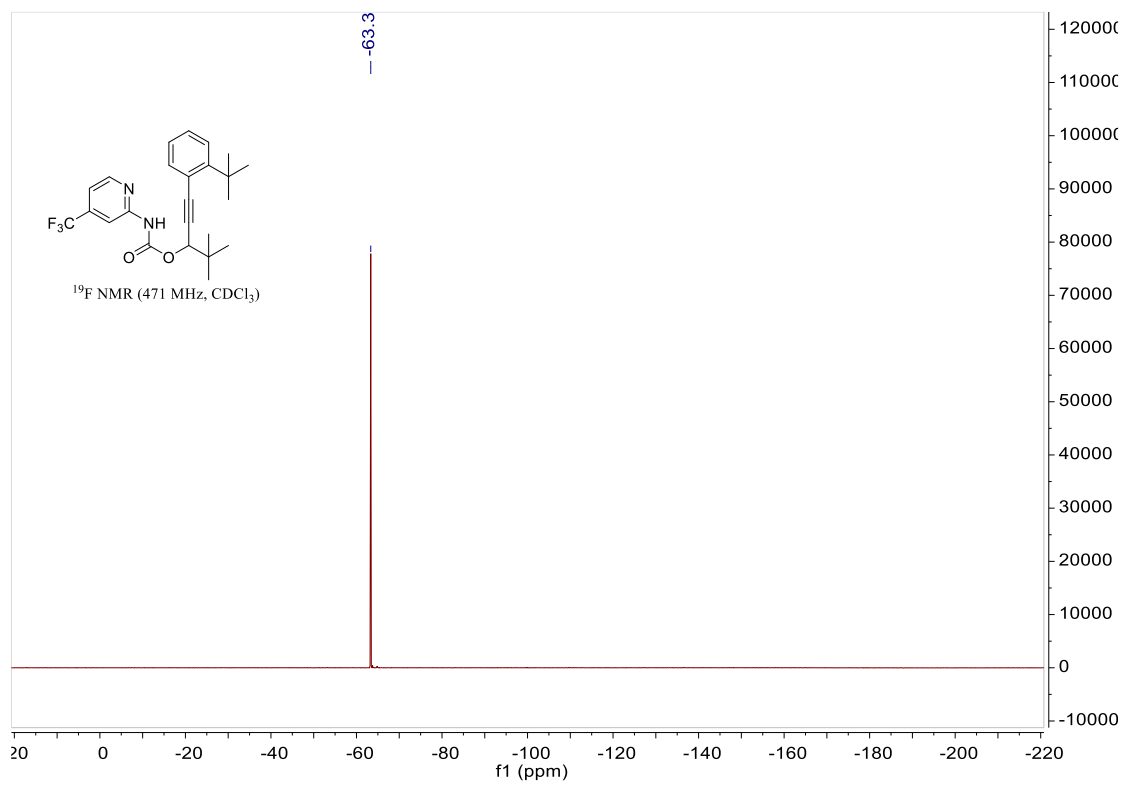

### Compound 2h

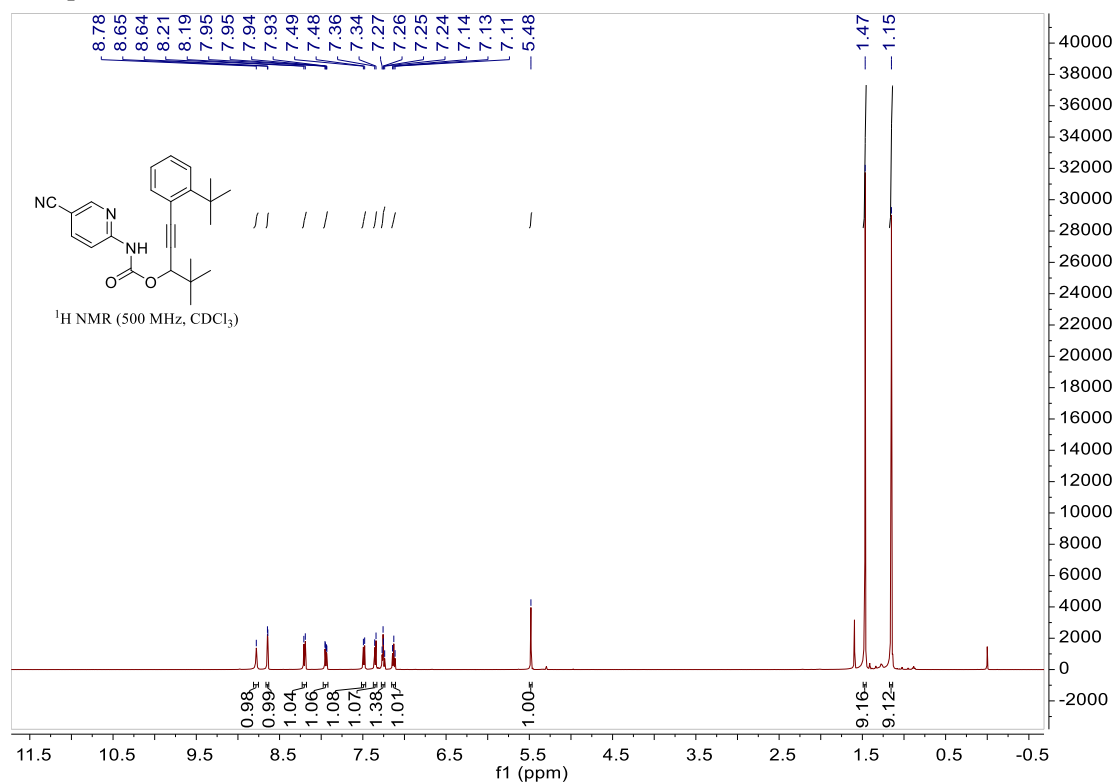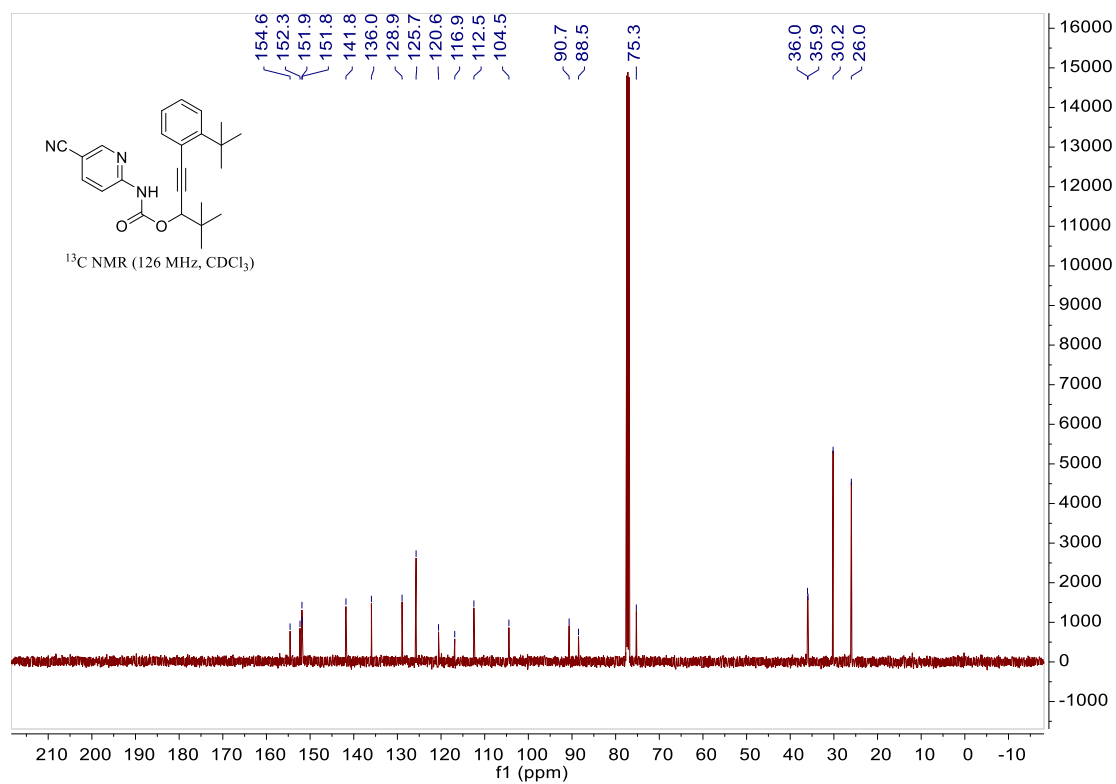

Compound 2i

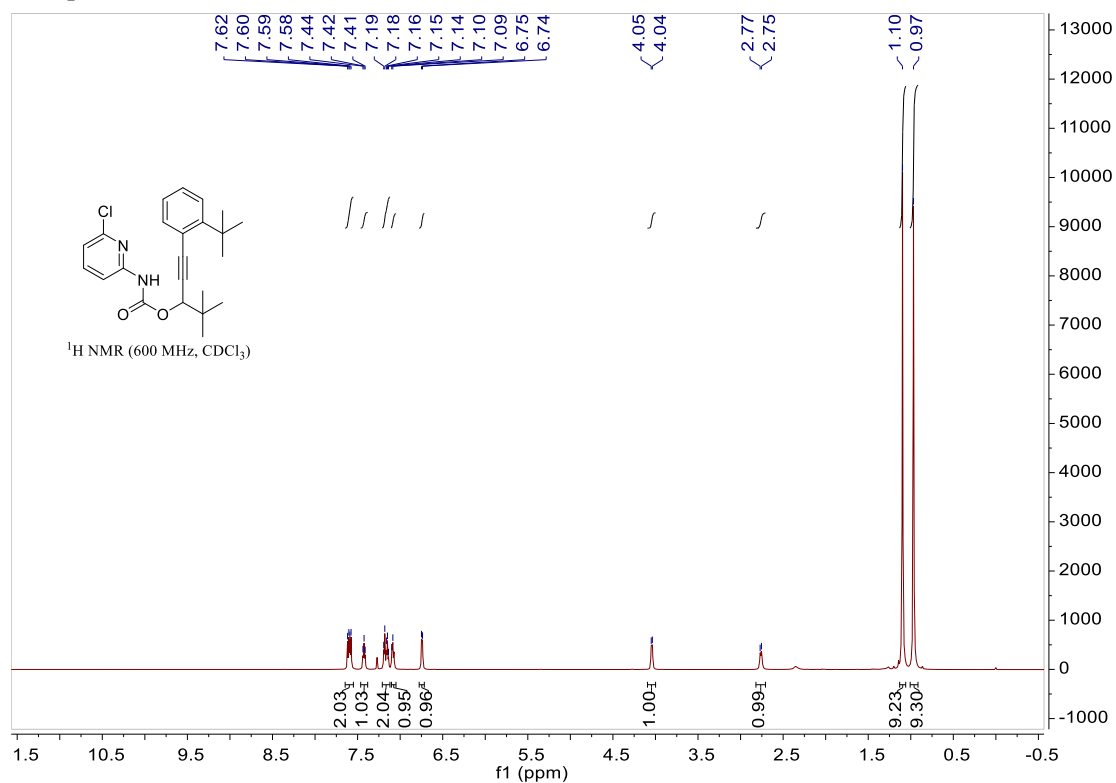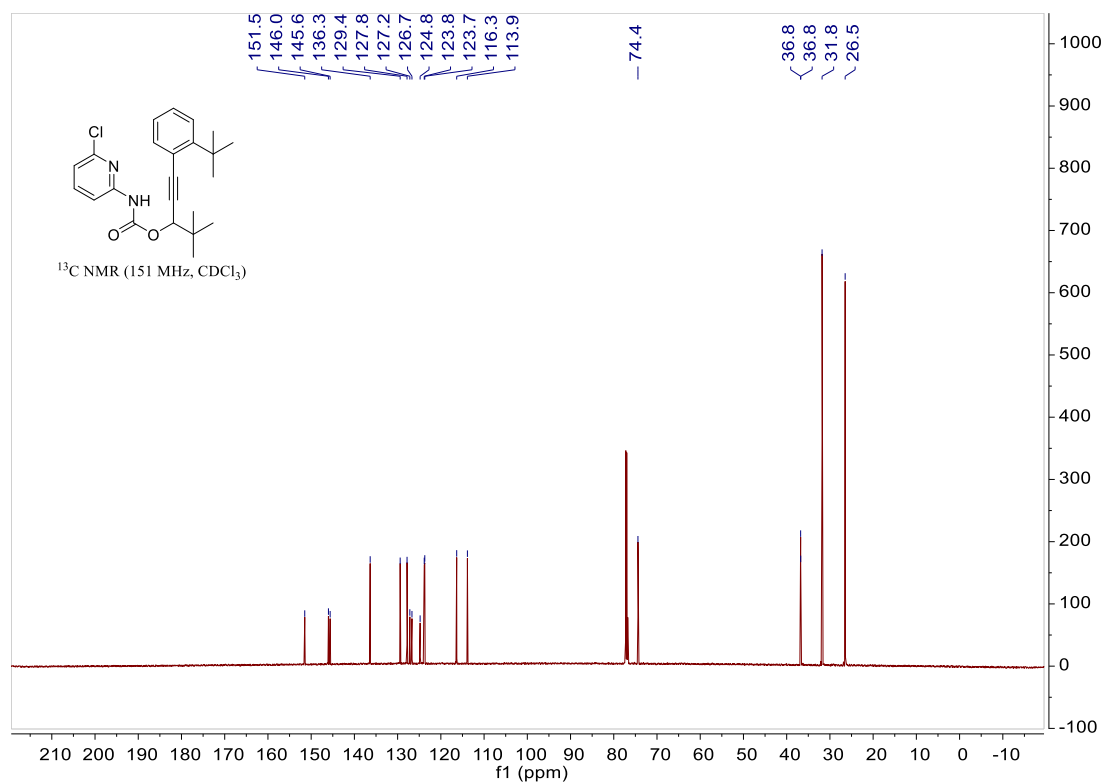

Compound 2j

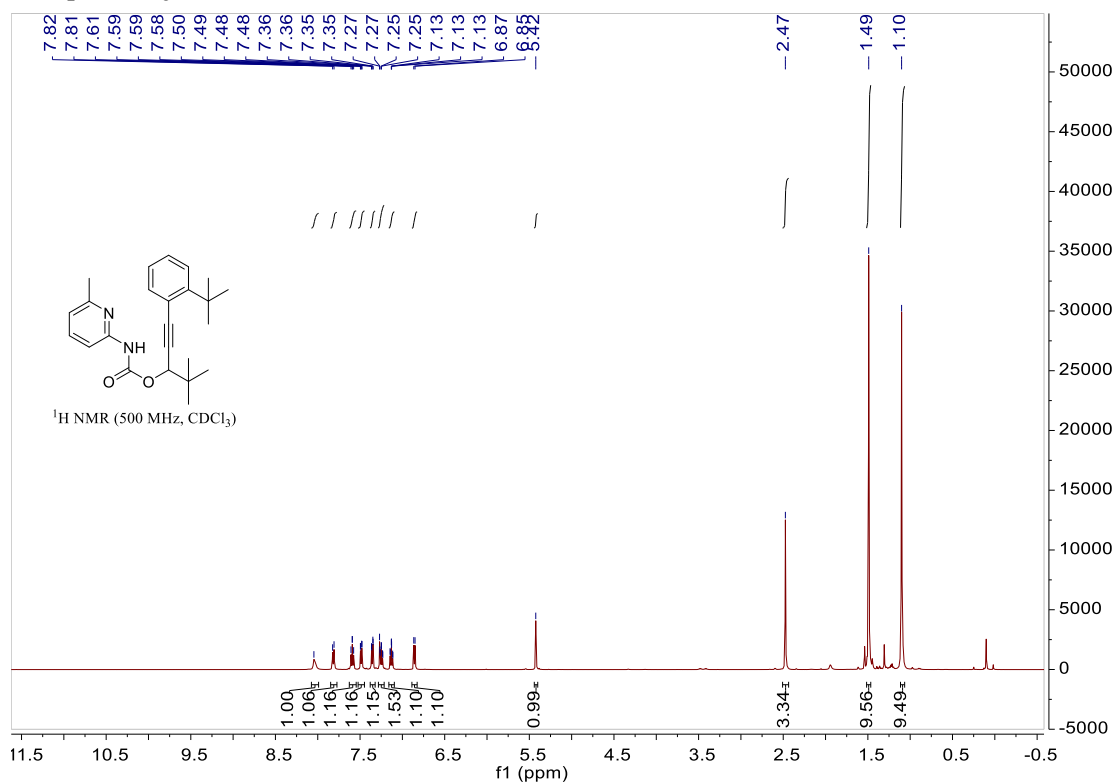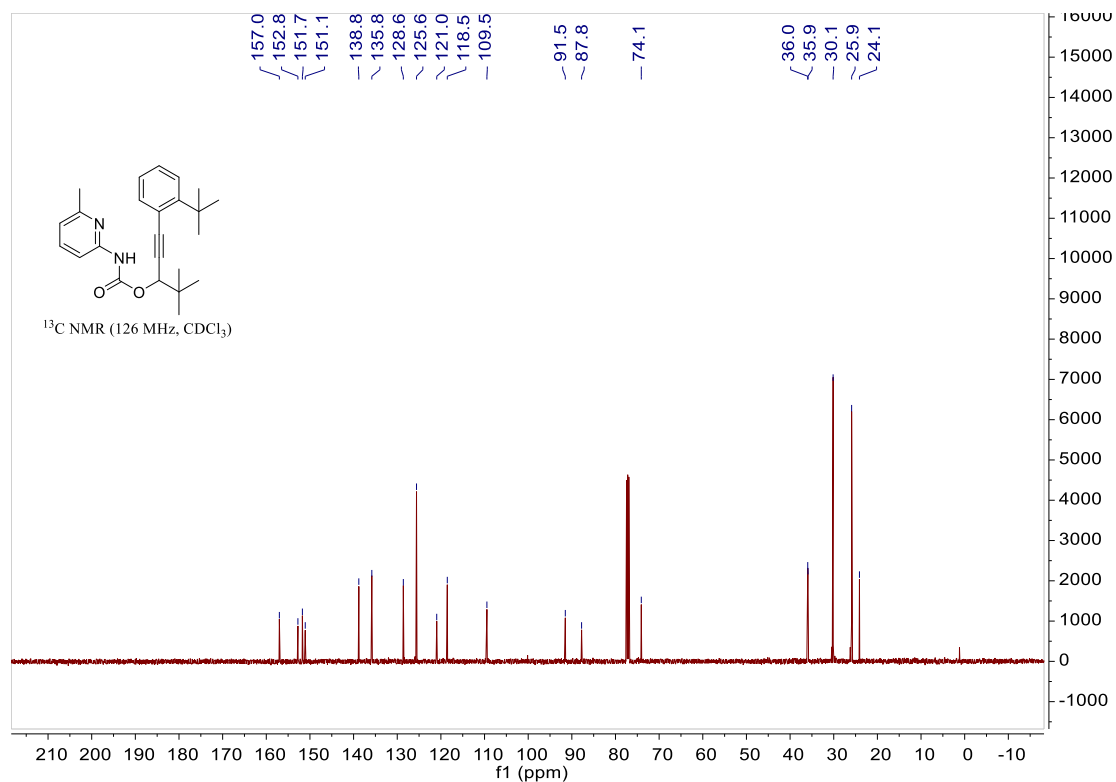



Compound 2k

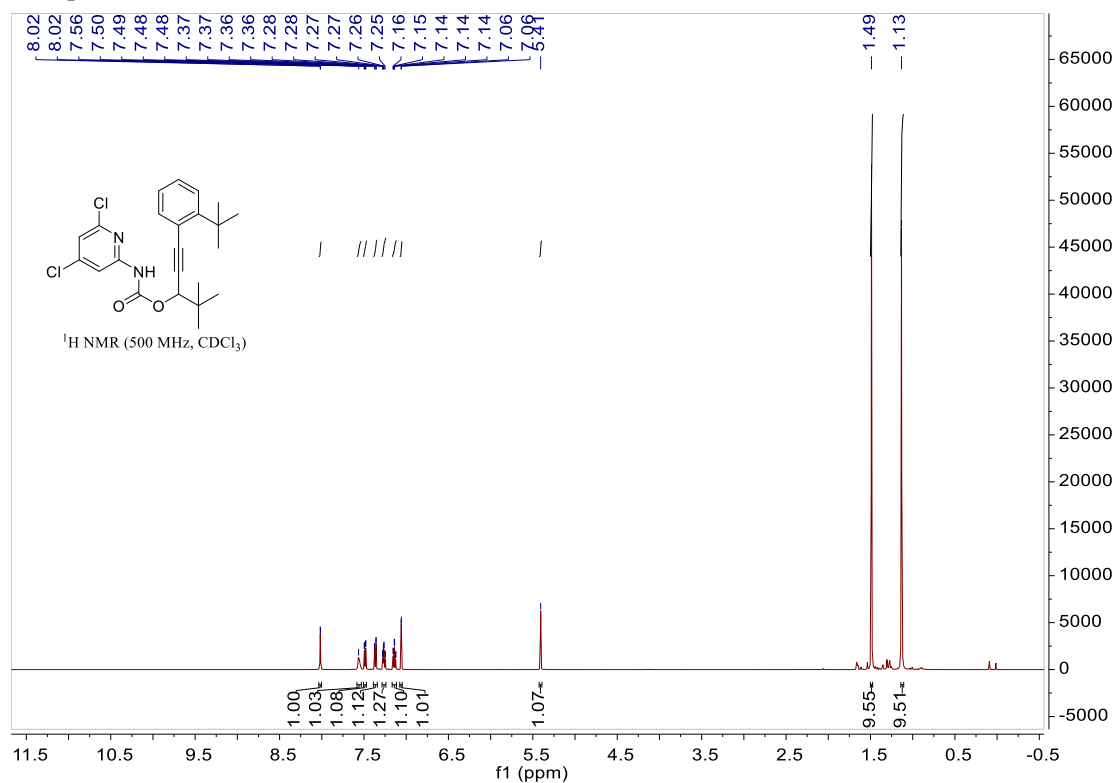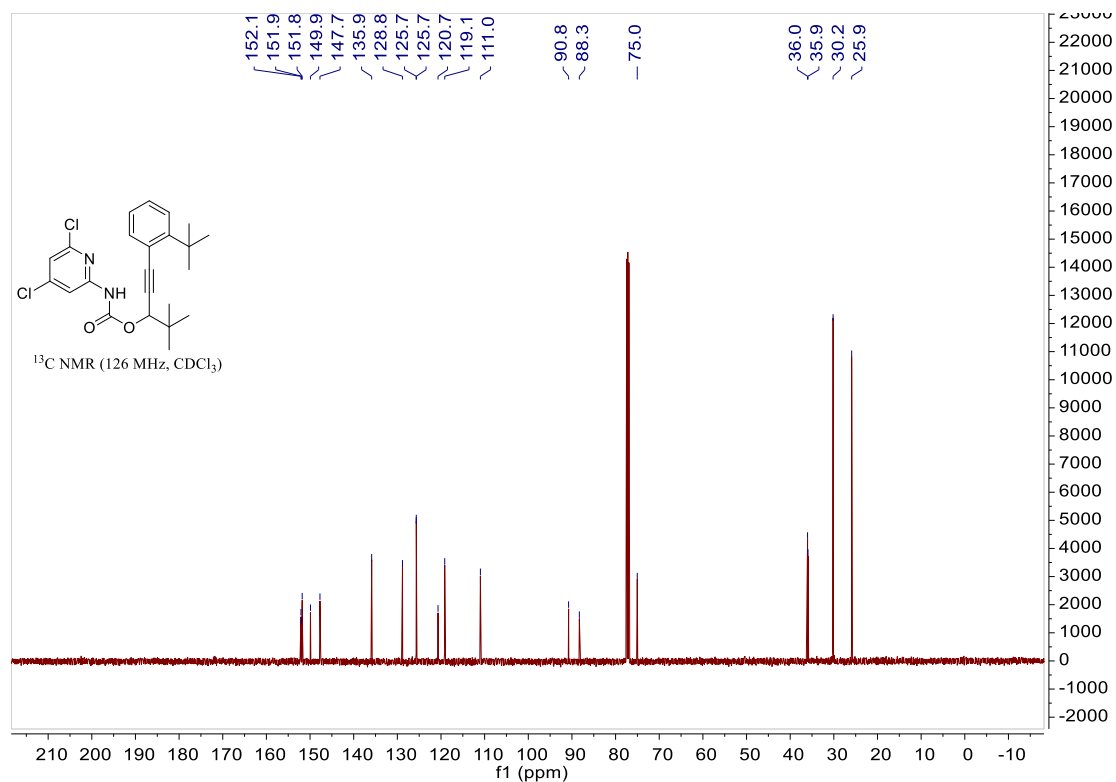

# Compound 21

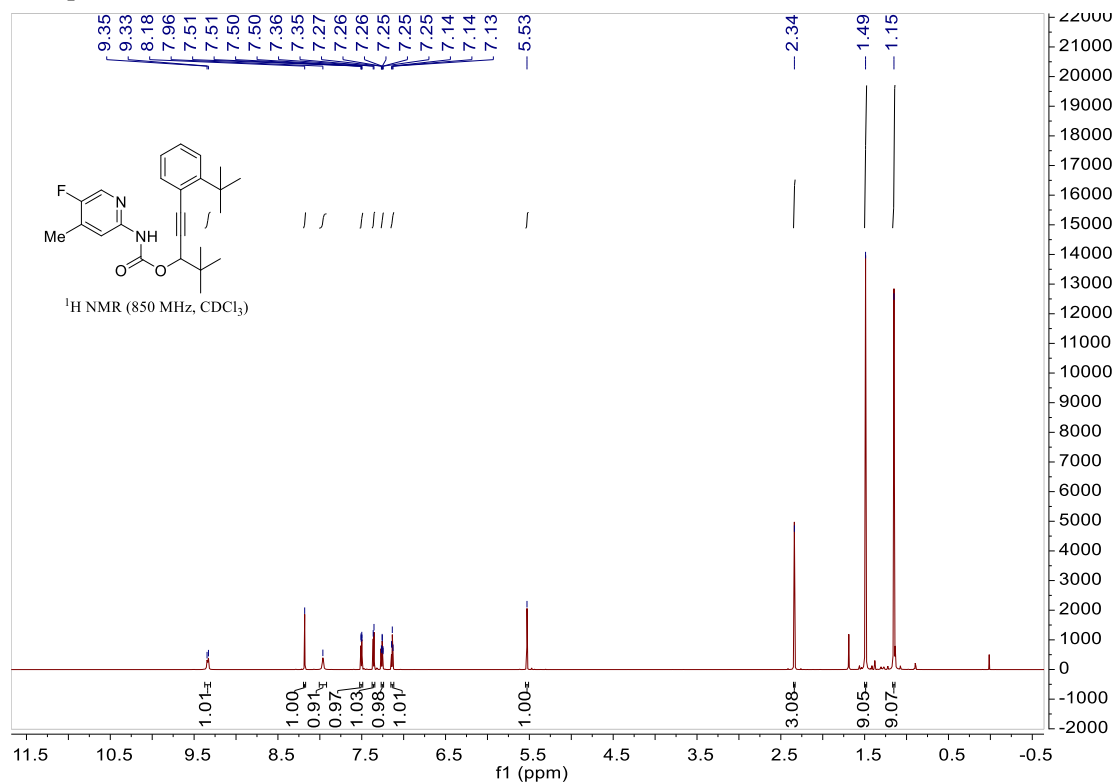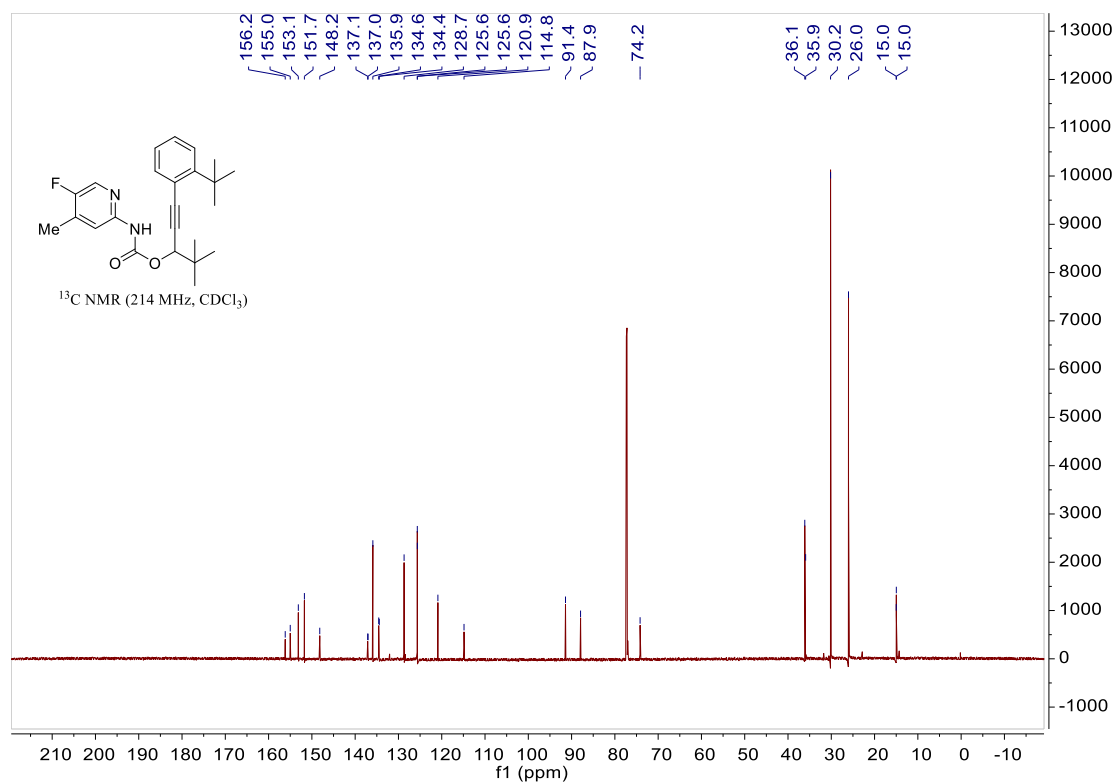

Compound **2m**

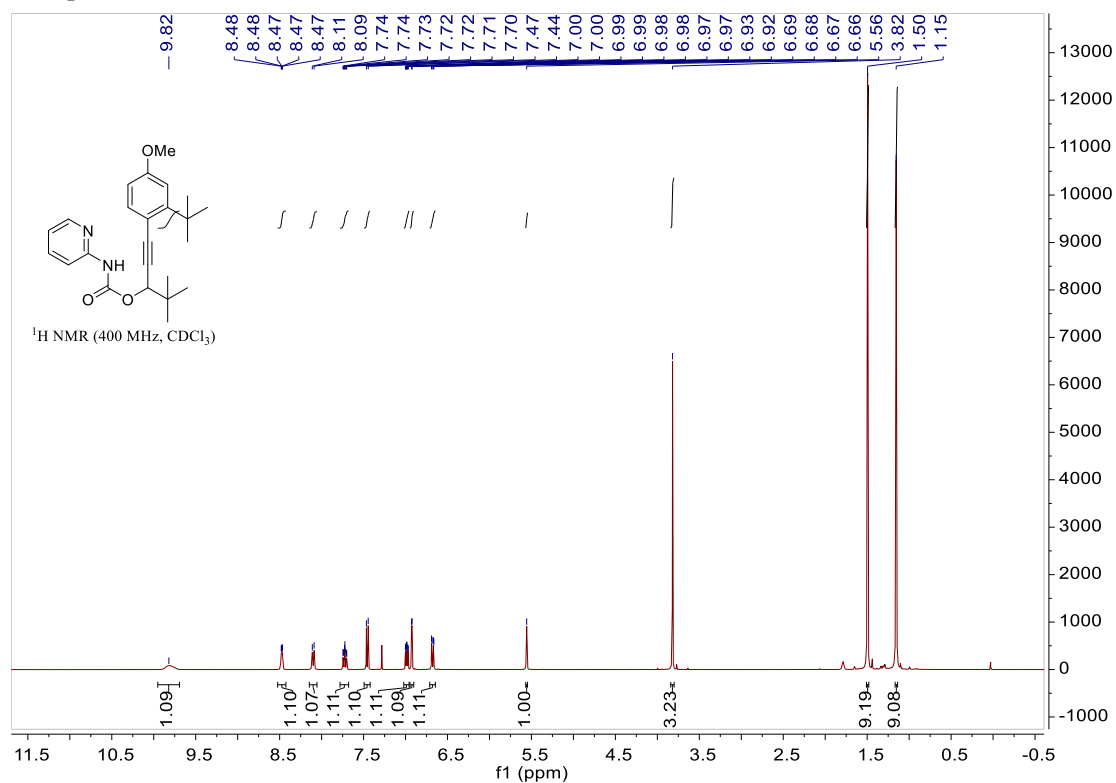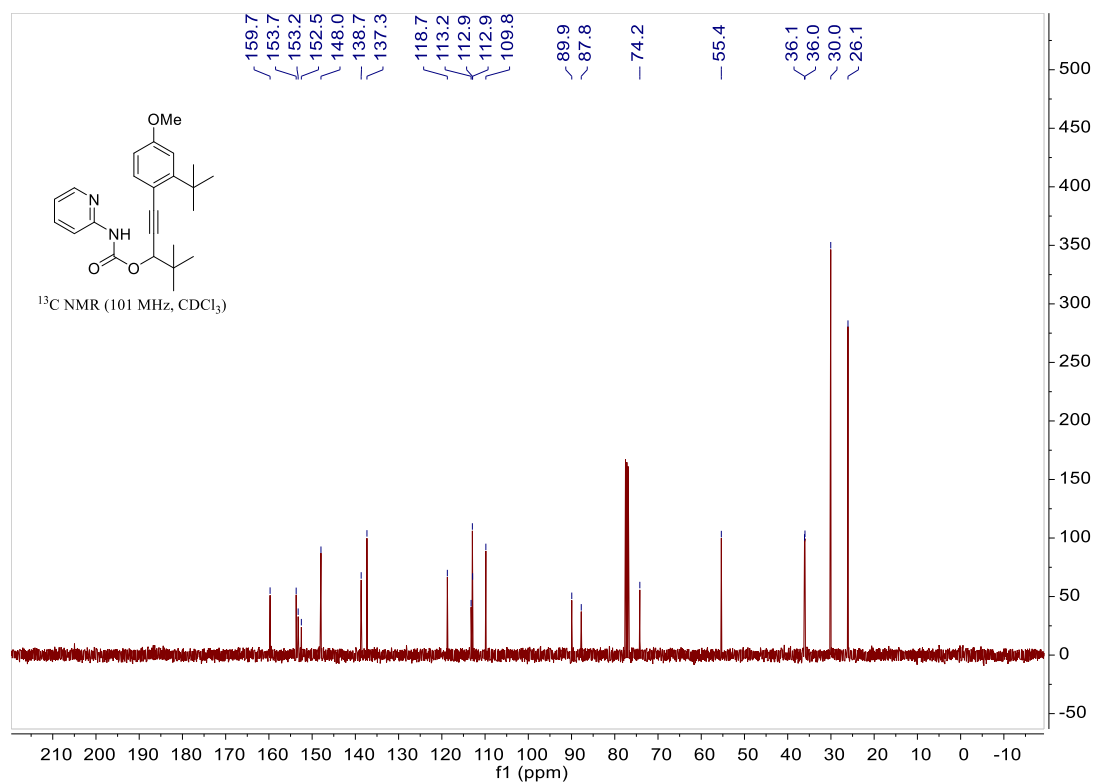

### Compound 2n

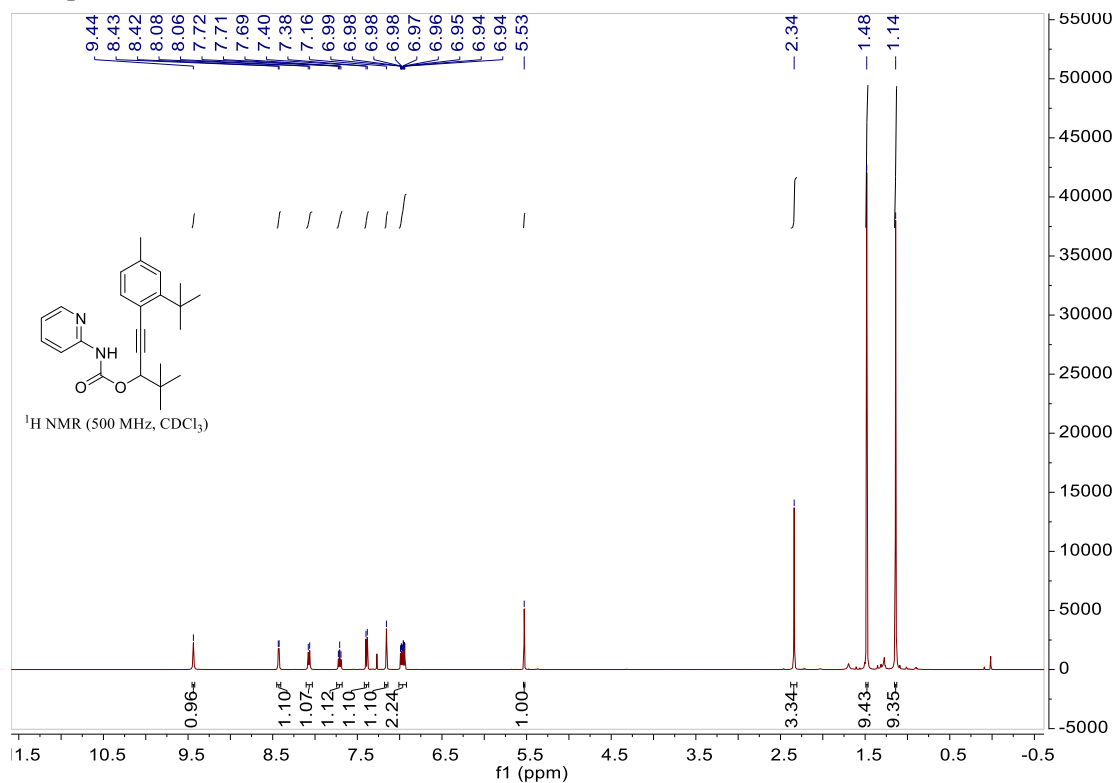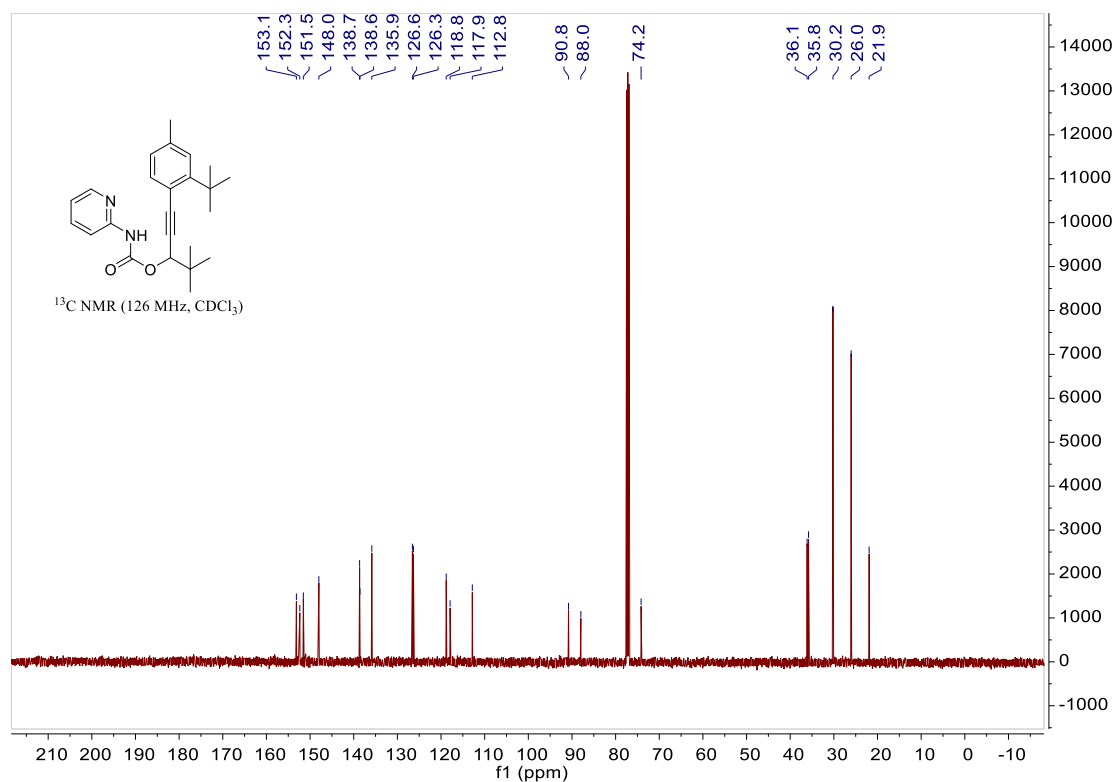

# Compound 20

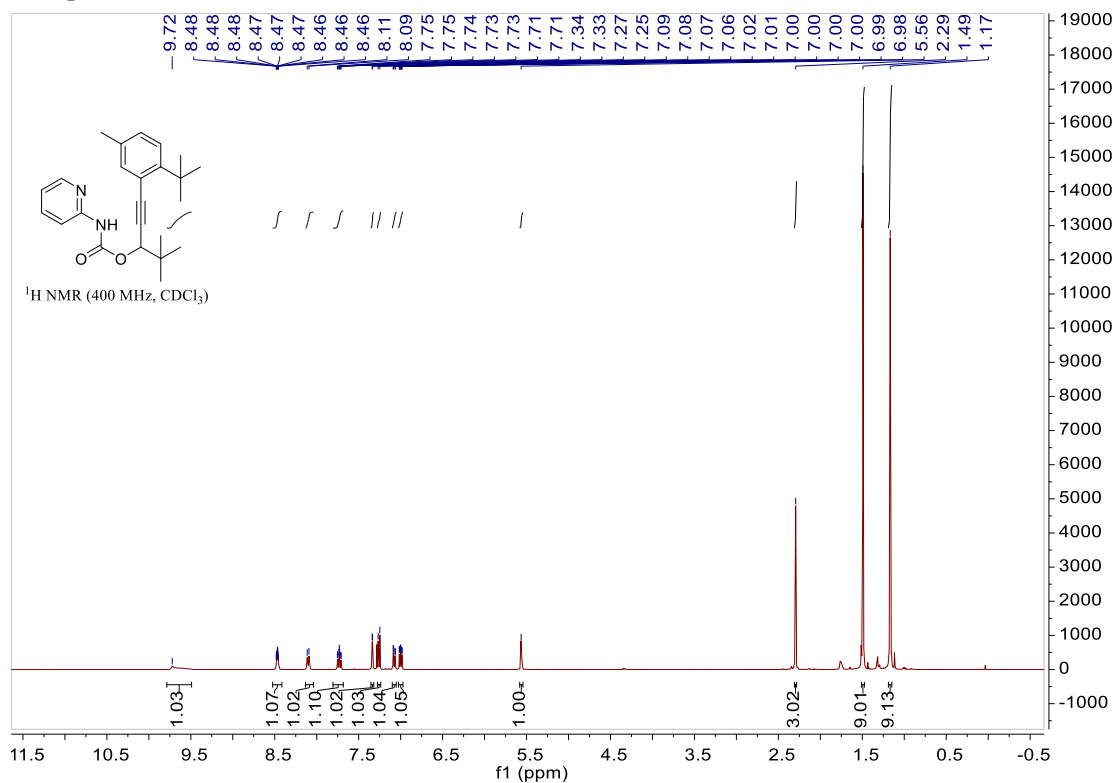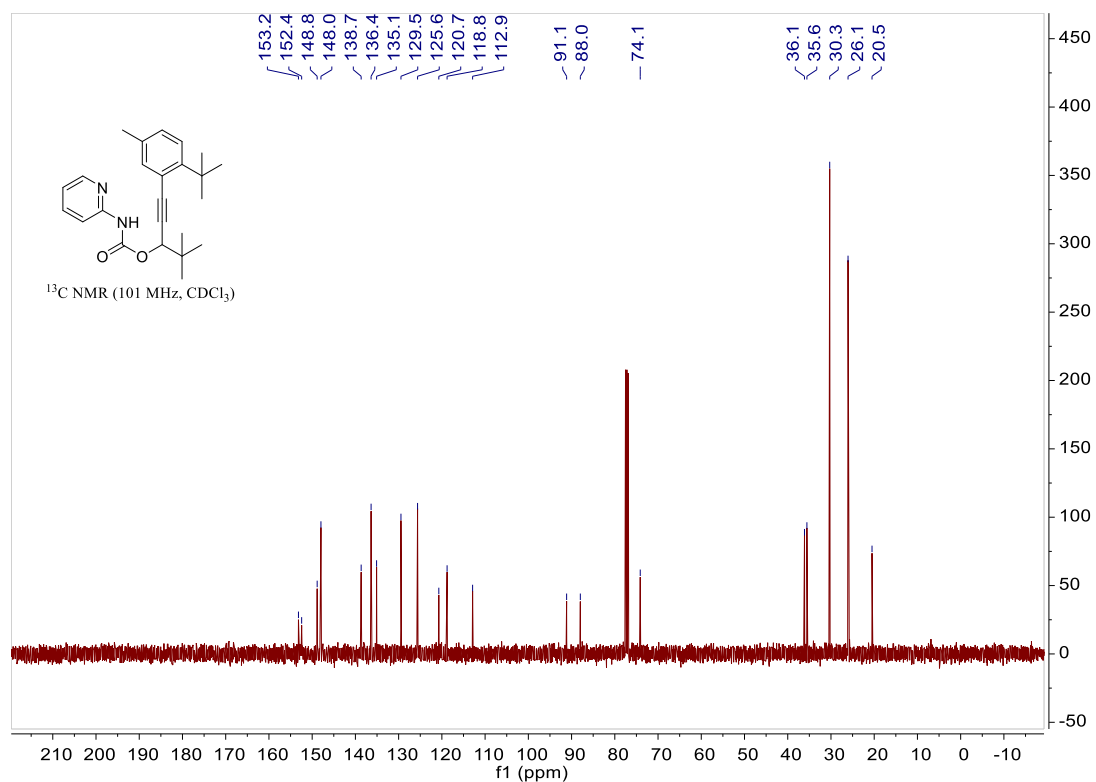

Compound 2p

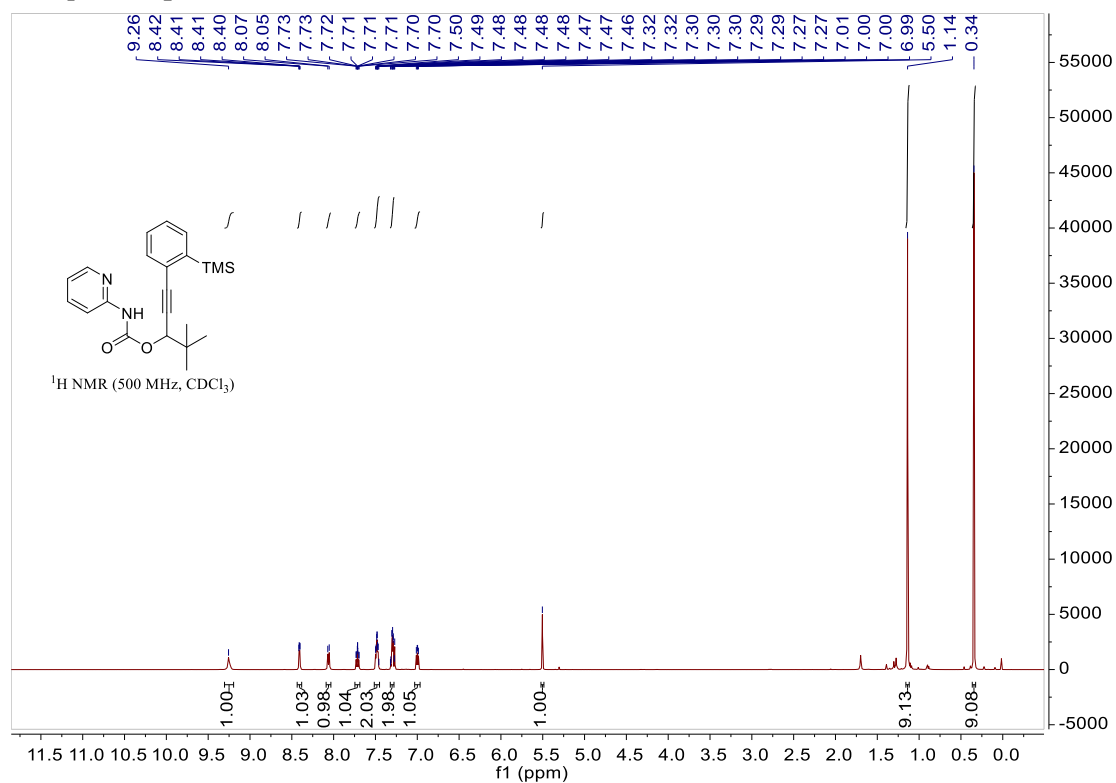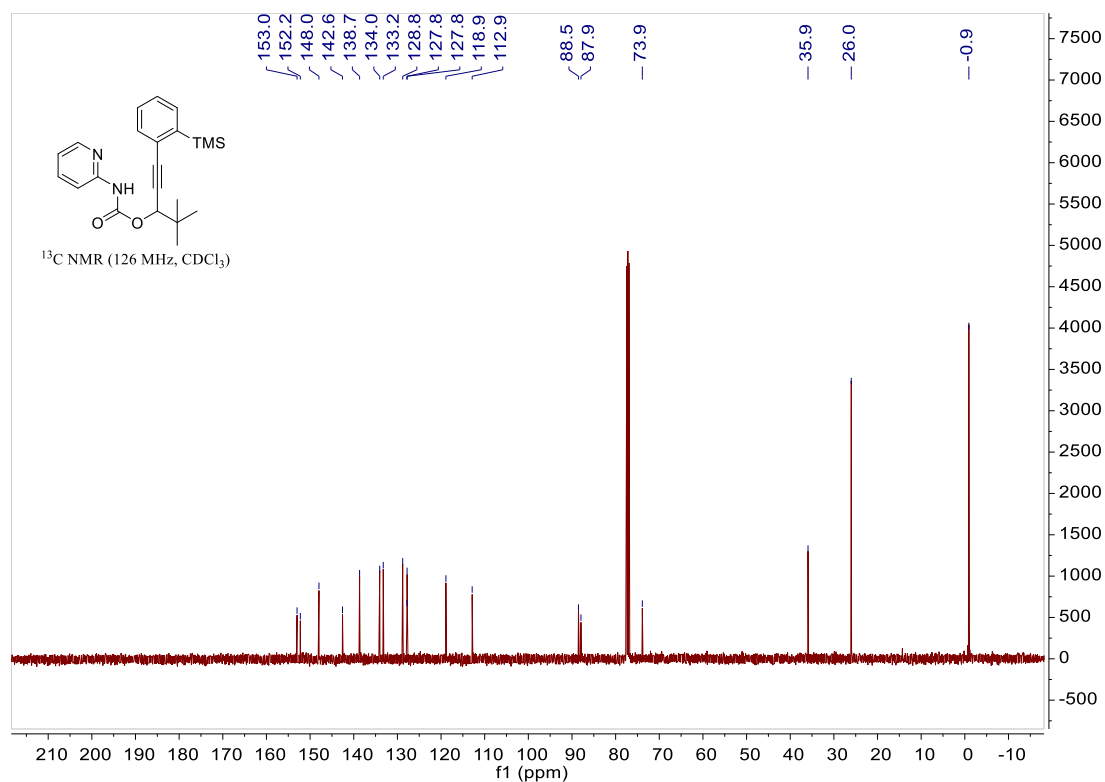



# Compound 2r

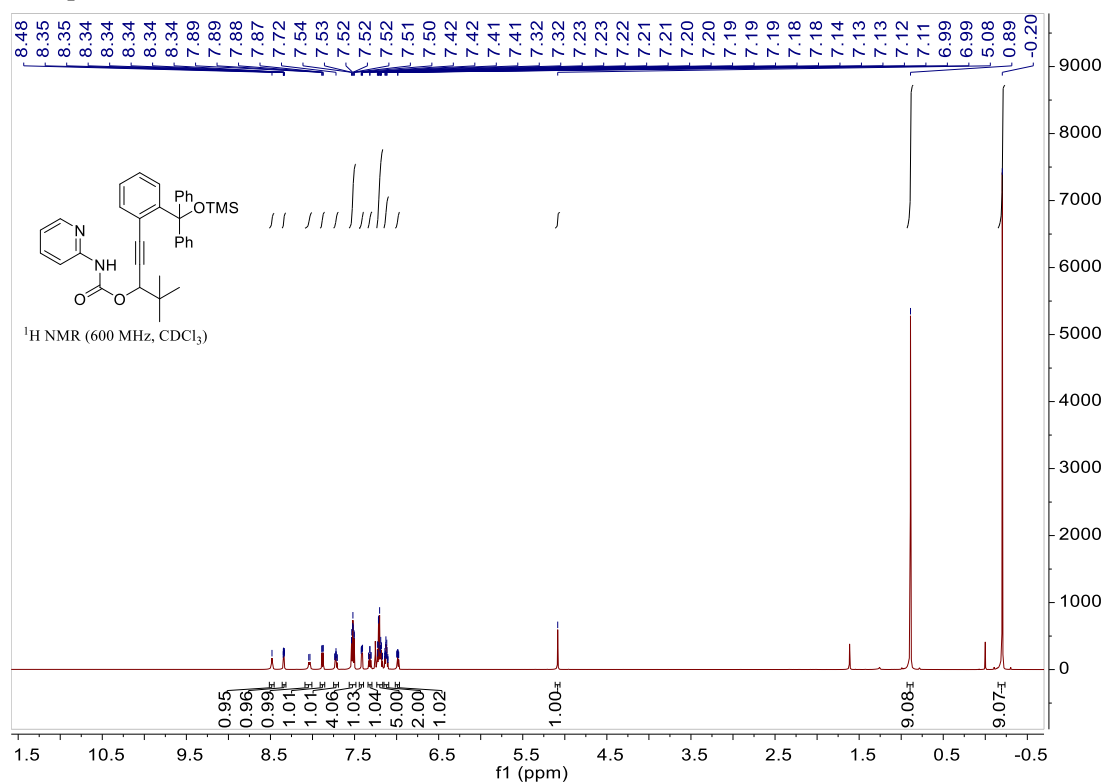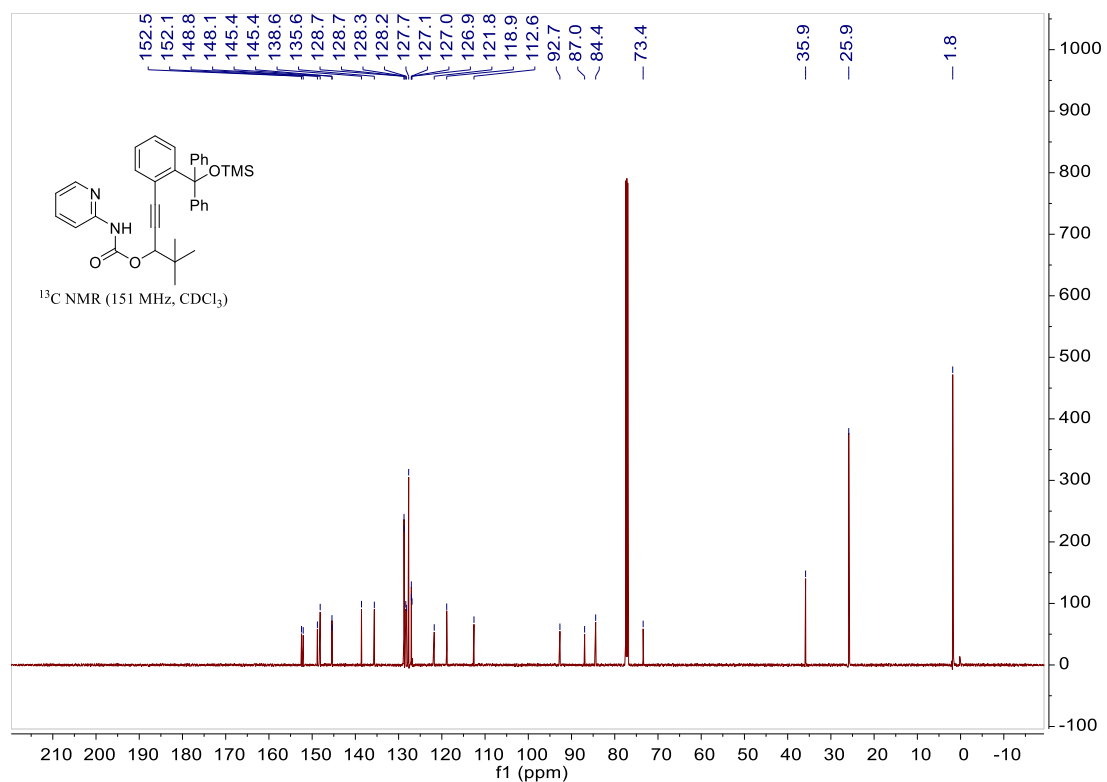



# Compound 2s

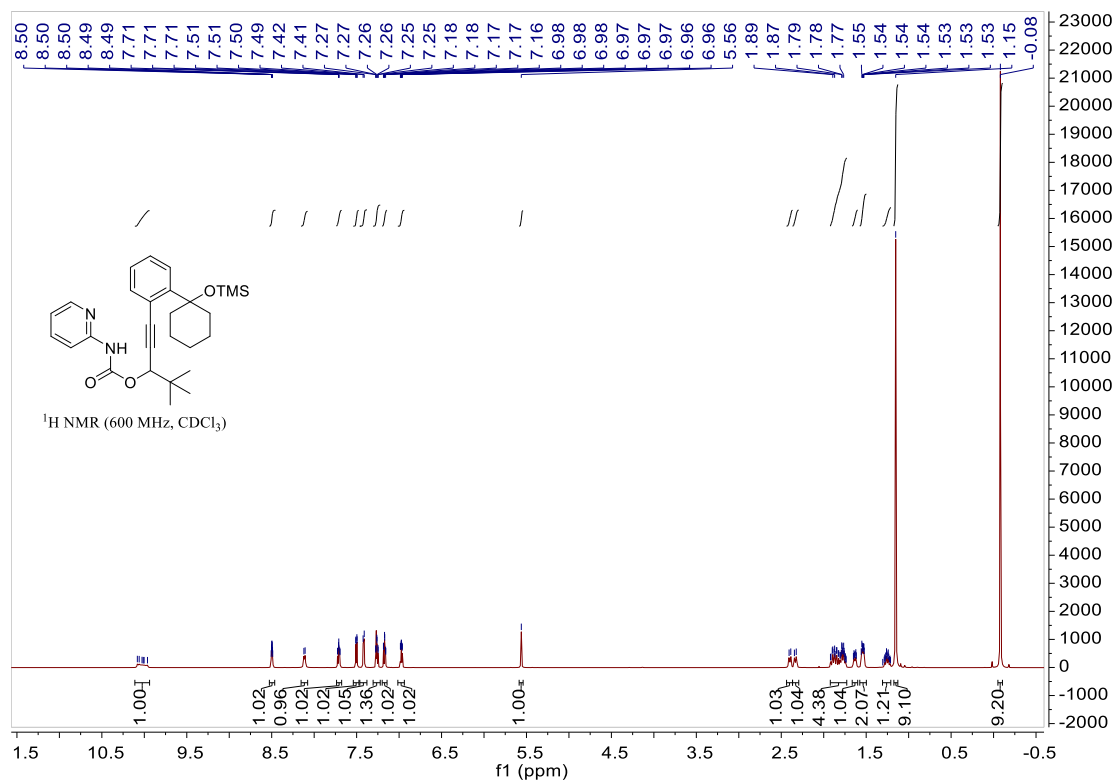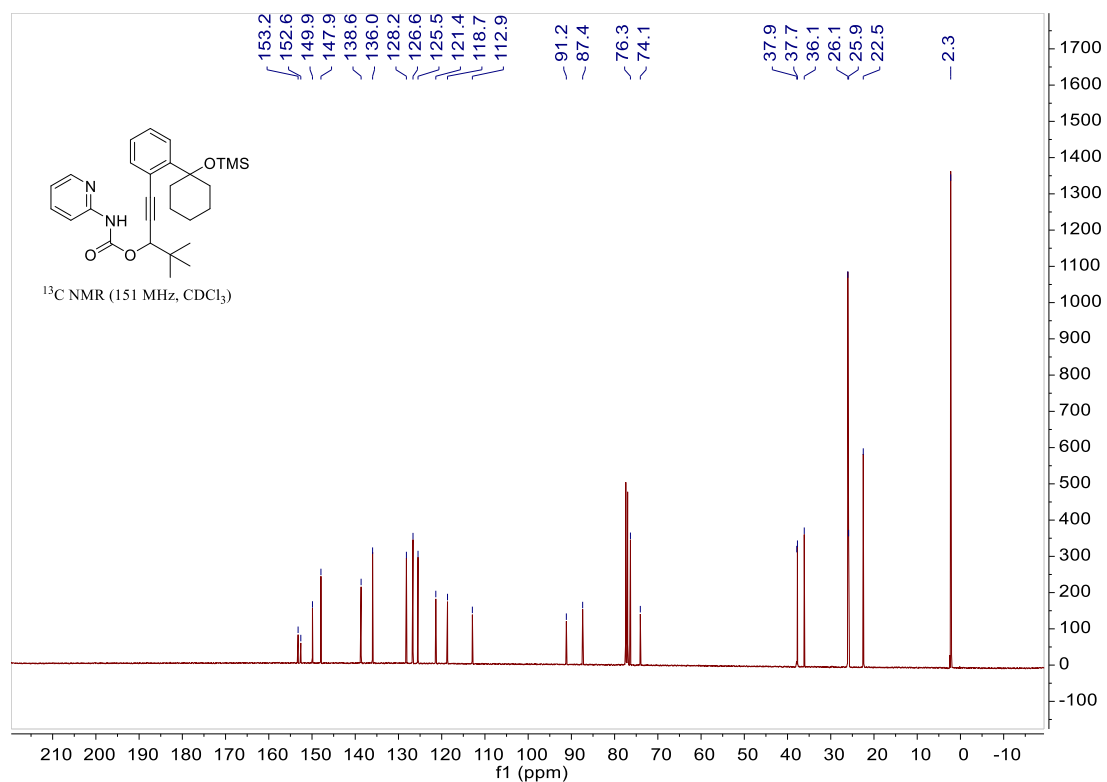

# Compound 2t

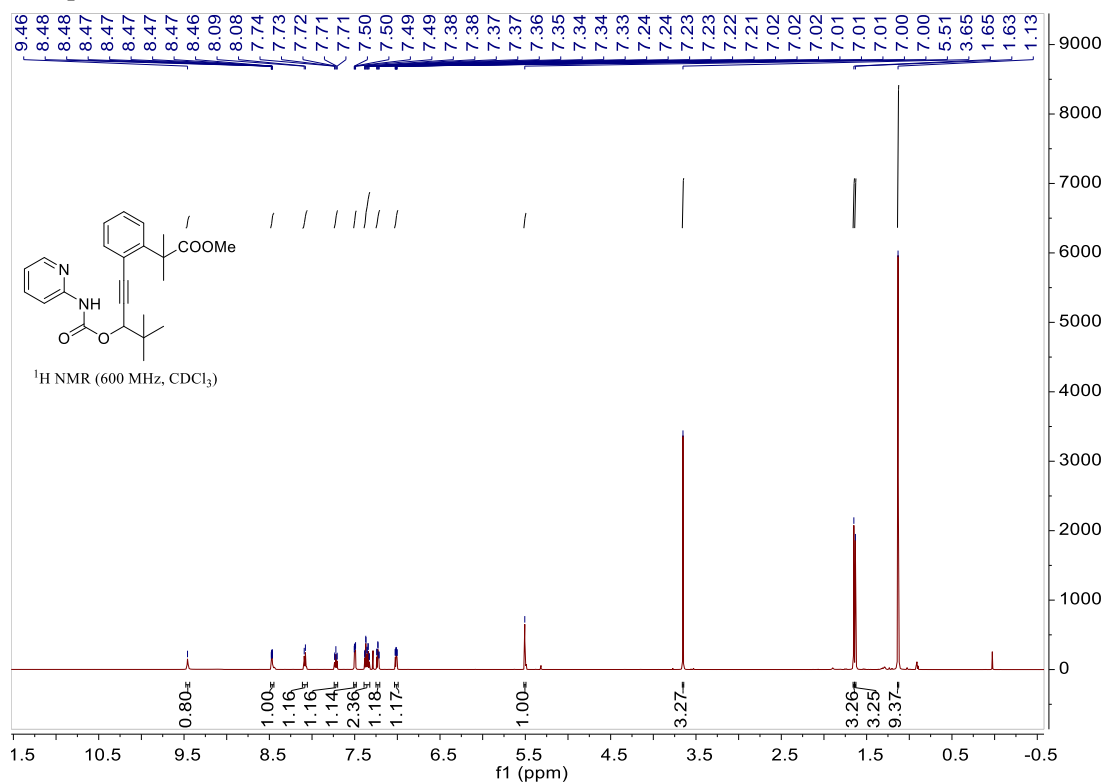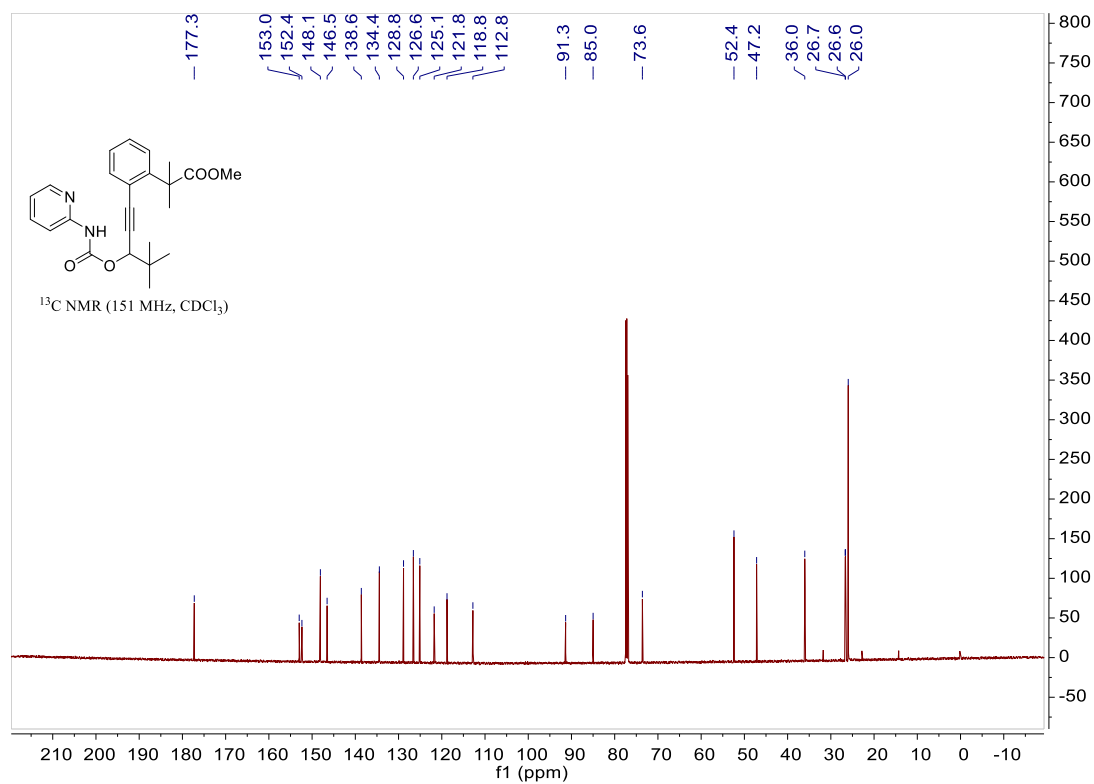



# Compound 2v

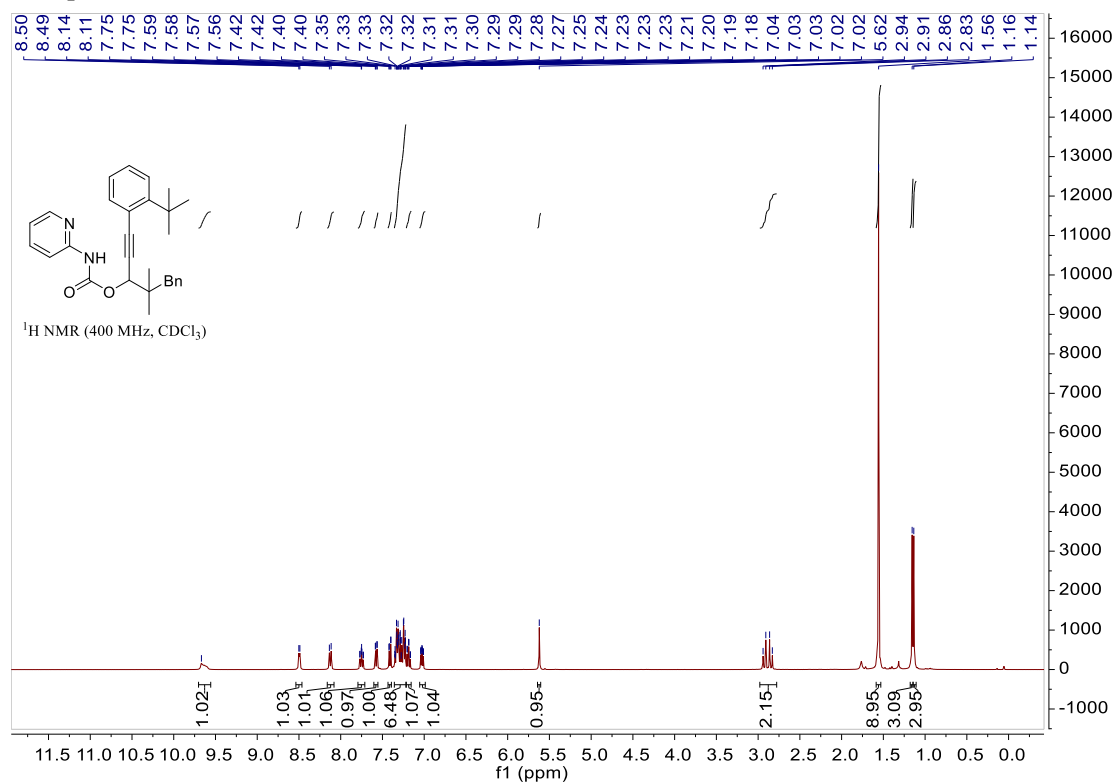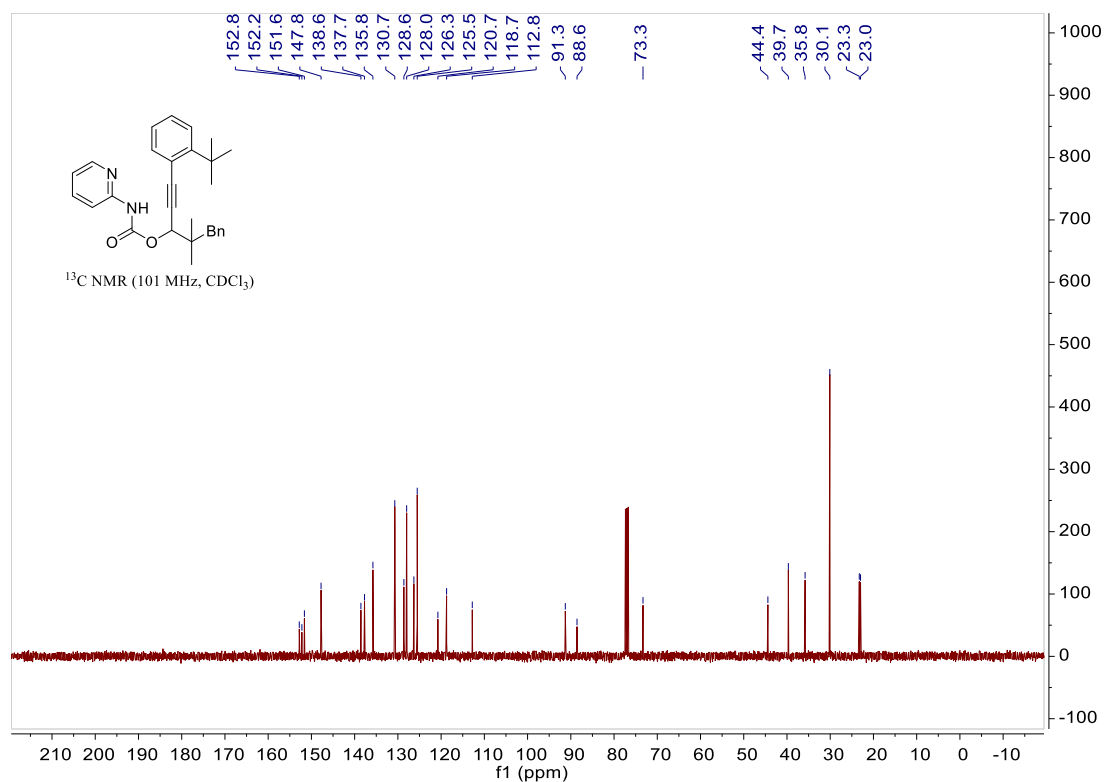

Compound 2w

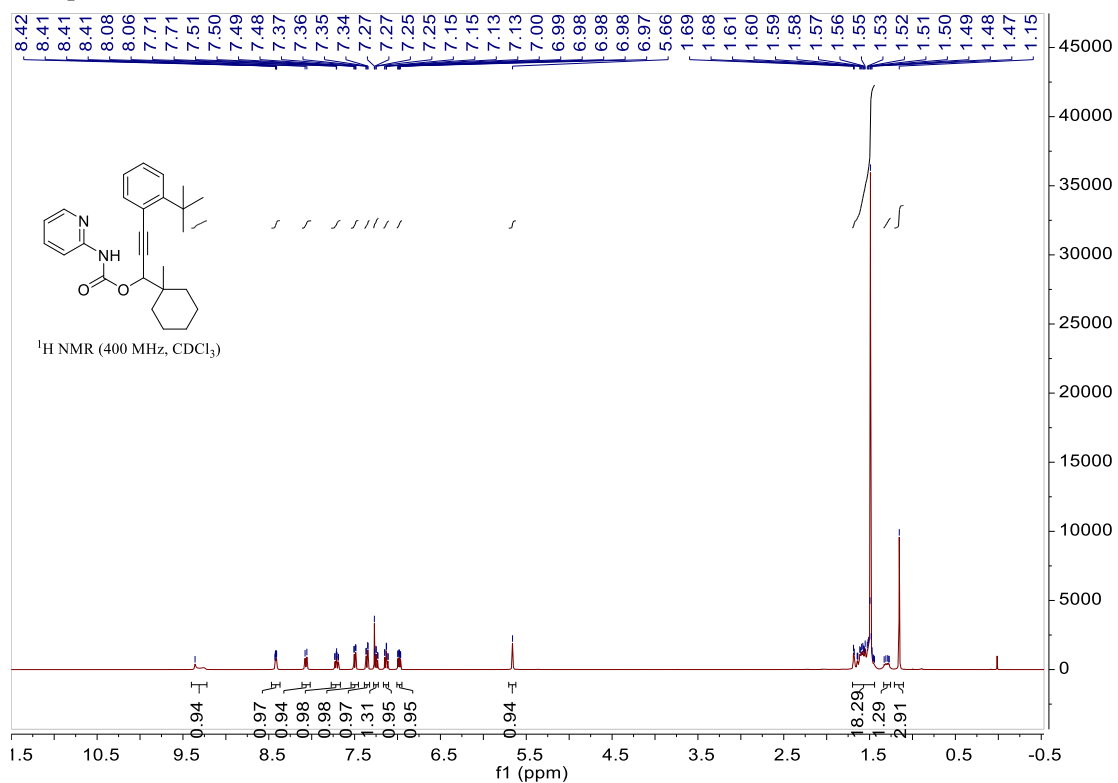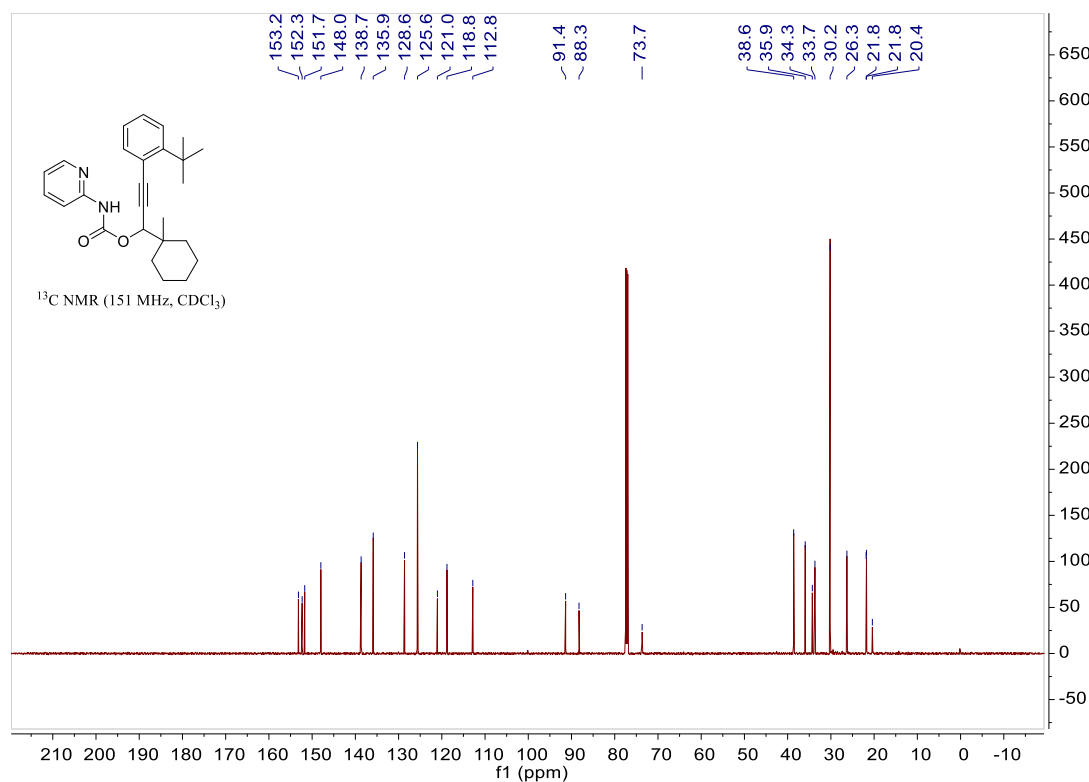

Supplement: Beilstein_J_Org_Chem-15-795-s001.pdf [file Beilstein_J_Org_Chem-15-795-s001.pdf]
